# Supplementary material for: Health facility structure and maternal characteristics related to essential newborn care in Brazil: a cross-sectional study
Source: PubMed Central journal article supplement — BMJ Open. 2018 Dec 31;8(12):e021431. doi: 10.1136/bmjopen-2017-021431 (PMC6318520; doi:10.1136/bmjopen-2017-021431), 2018-12-31
Supplement: bmjopen-2017-021431.draft_revisions.pdf [file bmjopen-2017-021431.draft_revisions.pdf]

# BMJ Open

BMJ Open is committed to open peer review. As part of this commitment we make the peer review history of every article we publish publicly available.

When an article is published we post the peer reviewers' comments and the authors' responses online. We also post the versions of the paper that were used during peer review. These are the versions that the peer review comments apply to.

The versions of the paper that follow are the versions that were submitted during the peer review process. They are not the versions of record or the final published versions. They should not be cited or distributed as the published version of this manuscript.

BMJ Open is an open access journal and the full, final, typeset and author-corrected version of record of the manuscript is available on our site with no access controls, subscription charges or pay-per-view fees (<http://bmjopen.bmj.com>).

If you have any questions on BMJ Open's open peer review process please email [info.bmjopen@bmj.com](mailto:info.bmjopen@bmj.com)

# BMJ Open

## ESSENTIAL NEWBORN CARE IN BRAZIL: COVERAGE AND RELATION WITH HOSPITAL STRUCTURE AND MATERNAL CHARACTERISTICS

|                               |                                                                                                                                                                                                                                                                                                                                                                                                                                                                                                                                         |
|-------------------------------|-----------------------------------------------------------------------------------------------------------------------------------------------------------------------------------------------------------------------------------------------------------------------------------------------------------------------------------------------------------------------------------------------------------------------------------------------------------------------------------------------------------------------------------------|
| Journal:                      | <i>BMJ Open</i>                                                                                                                                                                                                                                                                                                                                                                                                                                                                                                                         |
| Manuscript ID                 | bmjopen-2017-021431                                                                                                                                                                                                                                                                                                                                                                                                                                                                                                                     |
| Article Type:                 | Research                                                                                                                                                                                                                                                                                                                                                                                                                                                                                                                                |
| Date Submitted by the Author: | 28-Dec-2017                                                                                                                                                                                                                                                                                                                                                                                                                                                                                                                             |
| Complete List of Authors:     | MENEZES, MARIA ALEXSANDRA; Universidade Federal de Sergipe, ; Gurgel, Ricardo; Universidade Federal de Sergipe, Postgraduate Programme in Health Science<br>Bittencourt, Sonia; National School of Public Health (ENSP/FIOCRUZ), Department of Epidemiology and Quantitative Methods in Health<br>Pacheco, Vanessa; Escola Nacional de Saude Publica, Postgraduate Programme in Epidemiology and Public Health<br>Leal, Maria do Carmo; Escola Nacional de Saude Publica, Department of Epidemiology and Quantitative Methods in Health |
| Keywords:                     | NEONATOLOGY, EPIDEMIOLOGY, Quality in health care < HEALTH SERVICES ADMINISTRATION & MANAGEMENT, PUBLIC HEALTH                                                                                                                                                                                                                                                                                                                                                                                                                          |
|                               |                                                                                                                                                                                                                                                                                                                                                                                                                                                                                                                                         |

SCHOLARONE™  
Manuscripts

Peer Review Only

1  
2  
3 TITLE PAGE4  
5 ESSENTIAL NEWBORN CARE IN BRAZIL: COVERAGE AND RELATION WITH  
6 HOSPITAL STRUCTURE AND MATERNAL CHARACTERISTICS  
7  
8  
9

10 Corresponding author Maria Aleksandra da Silva Menezes

11 Postgraduate Programme in Health Science – Sergipe Federal University – Aracaju, Brazil

12  
13 Street Boquim, 477, Centro, Aracaju-SE/Brazil14  
15 ZIP Code 49010-28016  
17 [alexsandra.mar@hotmail.com](mailto:alexsandra.mar@hotmail.com)18  
19 55(79) 99142-030520  
21 55 (79) 3221-1598  
22  
23

## 24 Co-authors

25  
26 Ricardo Queiroz Gurgel - Postgraduate Programme in Health Science – Sergipe Federal  
27 University – Aracaju, Brazil  
28  
2930 Sonia Duarte de Azevedo Bittencourt - Department of Epidemiology and Quantitative Methods  
31 in Health, National School of Public Health (ENSP/FIOCRUZ) – Rio de Janeiro, Brazil  
32  
3334 Vanessa Eufrazino Pacheco - Postgraduate Programme in Epidemiology and Public Health –  
35 National School of Public Health (ENSP/FIOCRUZ) – Rio de Janeiro, Brazil  
36  
3738 Maria do Carmo Leal - Department of Epidemiology and Quantitative Methods in Health,  
39 National School of Public Health (ENSP/FIOCRUZ) – Rio de Janeiro, Brazil  
40  
41  
42  
43  
44  
45  
4647 Word Count: 2881 words.  
48  
49  
50  
51  
52  
53  
54  
55  
56  
57  
58  
59  
60

1  
2  
3 ABSTRACT  
4  
5

6 OBJECTIVES: To assess the availability of the Essential Newborn Care (ENC) program  
7 items, and how the non-use of such technologies associates with mothers' characteristics and  
8 hospital structure.  
9  
10

11  
12 SETTING: This is a complementary analysis of the "Birth in Brazil" study, a national  
13 hospital-based survey on postnatal women/newborn babies and of 266 public and private  
14 founding health facilities (secondary and tertiary level of care) of all macro regions in the  
15 country.  
16  
17  
18  
19  
20

21  
22 PARTICIPANTS: Data on 266 hospitals and 23.894 postnatal women and their newborn  
23 babies were analysed and that were representative of their macro-regions.  
24  
25

26  
27 PRIMARY AND SECONDARY OUTCOME MEASURES: The assessment was performed  
28 using six ENC items, interviewing mothers in the first 24 hours after delivery, and health facility  
29 managers. The structure was evaluated by the availability of medicines and equipment for  
30 perinatal care, paediatrician on call 24/7, neonatal intensive care unit (NICU), and kangaroo  
31 mother care. Each ENC item was assessed according to the health facility structure and the  
32 mothers' socio-demographic characteristics.  
33  
34  
35  
36  
37  
38  
39

40 RESULTS: The coverage in terms of the ENC items in Brazil varies depending on the  
41 characteristics of both the mother and the hospital. The factors associated with failures in  
42 pregnant woman reference were: pregnant adolescents (ORa 1.17; 95%CI 1.06-1.29),  $\leq 7$  years  
43 of schooling (ORa 1.47; 95%CI 1.22-1.78), inadequate antenatal care (ORa 1.67; 95%CI 1.47-  
44 1.89). The non-use of corticosteroids was more frequently associated to absence of NICU (ORa  
45 3.93; 95%CI 2.34-6.66), inadequate equipment and medicines (ORa 2.16 95%CI 1.17-4.01).  
46  
47  
48  
49  
50  
51  
52  
53  
54  
55  
56  
57  
58  
59  
60  
There was less partograph use (ORa 4.93; 95%CI 3.77-6.46), early skin-to-skin contact (ORa

1  
2  
3 3.07; 95%CI 3.37-4.90) and breast feeding in the first hour of birth (ORa 2.55; 95%CI 2.21-2.96)  
4  
5 after caesarean deliveries.

6  
7 CONCLUSIONS: The coverage of ENC technologies is low throughout Brazil with  
8  
9 regional differences. The association found between hospital structure and perinatal care  
10  
11 processes points to a need to prioritize interventions in less well-structured facilities.  
12  
13

14 **Keywords:** Essential Newborn Care, Brazil, structure, private health care, public health  
15  
16 care.  
17  
18  
19  
20  
21  
22  
23  
24  
25  
26  
27  
28  
29  
30  
31  
32  
33  
34  
35  
36  
37  
38  
39  
40  
41  
42  
43  
44  
45  
46  
47  
48  
49  
50  
51  
52  
53  
54  
55  
56  
57  
58  
59  
60

1  
2  
3 ARTICLE SUMMARY  
4

5 STRENGTHS AND LIMITATIONS OF THIS STUDY  
6  
7

8 Neonatal care is an international relevance issue. Many avoidable deaths related with  
9 prematurity still occur in high, but mostly in low and middle-income countries like Brazil.  
10  
11  
12

13  
14  
15 This article presents significant information about neonatal care in Brazil, with representative  
16 data of public and private founding health services of all macro regions in the country.  
17  
18  
19

20  
21  
22 The “Birth in Brazil” study was conducted in hospitals type where 80% of childbirths in the  
23 country are born. Smaller hospitals may be less structured, which would result in an  
24 underestimation of the inadequacy of health care.  
25  
26  
27  
28  
29

30  
31  
32 The study data were based on information provided by women early after delivery and by  
33 managers, rather than on observation of performance of the essential care items.  
34  
35  
36  
37  
38  
39  
40  
41  
42  
43  
44  
45  
46  
47  
48  
49  
50  
51  
52  
53  
54  
55  
56  
57  
58  
59  
60

## INTRODUCTION

In Brazil, antenatal care coverage is high and the hospital delivery rate is almost 100%. [1] Nonetheless, neonatal mortality remains high and nearly one quarter of deaths occur in the first 24 hours of life. [2] The main reasons are avoidable causes like complications from preterm births, sepsis, and intrapartum-related asphyxia.[3] This situation reflects economics, social and biological disparities, but may be also linked to the quality of antenatal care, labour, and birth assistance. Almost two decades ago, with a view to reducing neonatal mortality and morbidity, the World Health Organization (WHO) recommended specific care practices outlined in the Essential Newborn Care (ENC) program. These are strategic actions extended from preconception care through postnatal period. [4] Infant mortality tends to be lower in countries where the coverage of these essential interventions is high. [5]

However, no national data are available on public policies, such as antenatal corticosteroid use in managing preterm labour, and on the availability of the kangaroo mother care (KMC) for preterm or low birthweight newborns. [5] Thus, identifying shortcomings in perinatal care in Brazil is an essential stage in conducting interventions in underprivileged groups.

This is a problem that may reach most countries of similar socioeconomic development situation and is visible in different places and with different intensities.[6]

This study aims to evaluate the availability of certain core technologies in caring for mothers and newborns, as defined in the Essential Newborn Care program, as well as the association between the non-use of these technologies and variables relating to hospital structure and characteristics of the mothers.

## METHODS

This study performed a complementary analysis of the “Birth in Brazil” study, [7] a national hospital-based survey conducted between February 2011 and October 2012, including data on mothers’ pregnancy and delivery, their newborn babies, and the structure of health facilities. The sample was selected using three-stage cluster sampling. The first encompassed hospitals with 500 or more deliveries per year, stratified according to Brazil’s five geographical macro-regions (North, Northeast, Southeast, South and Mid-West), location (state capital or not), and type of funding (public and private). The second included days (minimum of seven days of data collection at each hospital) and the third included postnatal women and their newborn babies. The sampling weights for the hospitals were based on the inverse of their probabilities of inclusion in the sample. To ensure that the total estimates were equivalent to the number of hospitals in the sample, a calibration process was used on each stratum of the selection. The results shown are the estimates for the universe of hospitals studied (1402) based on the sample of hospitals visited. In each of these, 90 postnatal women were interviewed. More information on the sample design is available in a prior publication.[8]

Data were collected by interviewing postnatal women in the first 24 hours after delivery and health facility managers, and by consulting the hospital records of the women and babies. In addition, antenatal record cards were photographed for subsequent data extraction. Detailed information on the data collection instruments is reported in Do Carmo Leal et al.[7] and Bittencourt et al. 2014.[9]

In line with WHO recommendations,[4] six essential neonatal care variables were investigated: adequate referral of the pregnant woman during the antenatal period to a specific health facility for delivery; administration of antenatal corticosteroids when indicated[10] to women at risk of preterm birth between 24 and 34 weeks’ gestation (gestational age was calculated using an algorithm that primarily relied upon early ultrasound



1  
2  
3 estimates);[11] continuous social support (a companion at all times during the mother's  
4 hospital stay); use of a partograph during labour; early skin-to-skin contact between mother  
5 and her newborn whilst still in the delivery room; and breast feeding in the first hour of birth.  
6  
7

8  
9  
10 At the hospitals, the following structure-related variables were investigated: existence  
11 of a neonatal intensive care unit (NICU) and use of the KMC, a paediatrician on call round the  
12 clock, availability of equipment for the emergency care of mothers (laryngoscope and  
13 endotracheal tube, self-inflating bag valve mask, and mechanical ventilator) and newborns  
14 (laryngoscope and endotracheal tube, self-inflating bag valve mask, suction device, adapter for  
15 meconium aspirator, mechanical ventilator and warming device), and availability of medicines  
16 for the mothers and newborns (antihypertensives, anxiolytics/hypnotics, corticosteroids,  
17 oxytocics, inhibitors of uterine contractility, coagulants/haemostatics, magnesium sulphate,  
18 surfactant, eye drops for prophylaxis of gonococcal ophthalmia, and anti-D immunoglobulin  
19 for Rh-negative women) as required by Brazilian law.[12] For the set of equipment and  
20 medicines, a degree of adequacy was calculated by taking affirmative responses as a  
21 percentage of total items investigated. Health facilities were classified as adequate if 80% or  
22 more of the items were available and inadequate if less than 80% were available. Equal  
23 weights were attributed to all items studied.  
24  
25  
26  
27  
28  
29  
30  
31  
32  
33  
34  
35  
36  
37  
38  
39

40 The study variables were compared according to type of funding (public or private),  
41 macro-region (North, Northeast, Southeast, South and Mid-West), location (state capital or  
42 not), as well as by the mothers' characteristics, such as age (12 to 19, 20 to 34 and 35 or more  
43 years old), schooling (7 or less, 8 to 10, 11 to 14 and 15 or more years in school), sufficient  
44 number of antenatal care visits (4 or more visits = adequate; fewer than 4 = inadequate), and  
45 delivery route (vaginal or caesarean section). Women who gave birth in public or mixed-  
46 funding hospitals, but who were not covered by private health insurance plans, were classified  
47 as receiving public health care at childbirth. Women whose birth was covered by a private  
48  
49  
50  
51  
52  
53  
54  
55  
56  
57  
58  
59  
60

1  
2  
3 health insurance plan, and those who gave birth in private hospitals regardless of coverage by  
4  
5 a health insurance plan, were classified as receiving private health care at childbirth.

6  
7 For each ENC-related variable, the percentage use was calculated (95% Confidence  
8  
9 Interval-CI) according to variables relating to the health facility structure and the mothers'  
10  
11 socio-demographic characteristics. Simple regression models with robust variance were then  
12  
13 developed to estimate the strength of the associations between the dependent variable (non-  
14  
15 access to each item of essential newborn care – yes/no) and the independent variables listed  
16  
17 above. Crude odds ratios with respective 95% CI were then estimated. In sequence, multiple  
18  
19 regression models were developed with each dependent variable and the independent  
20  
21 variables that proved significant in the first analysis. Independent variables that proved  
22  
23 significant (to a 5% level of significance) in explaining the use or the non-use of each of the  
24  
25 essential care items were retained in the model. The odds ratios were adjusted and 95% CI  
26  
27 were estimated. All results were obtained using IBM® SPSS - Statistical Package for the Social  
28  
29 Sciences, for Windows, version 22.

30  
31  
32 The ethics committee of the Sergio Arouca National School of Public Health, Oswaldo  
33  
34 Cruz Foundation (CEP/ENSP), approved this study under the research protocol  
35  
36 CAAE:0096.0.031.000–10. All hospital directors and postnatal women gave written informed  
37  
38 consent.  
39  
40  
41  
42  
43  
44  
45  
46  
47  
48  
49  
50  
51  
52  
53  
54  
55  
56  
57  
58  
59  
60

## RESULTS

Data on 23,894 postnatal women and their newborn babies were analysed at 266 hospitals that provided childbirth care in Brazil and that were representative of their macro-regions and respective strata, about the type of funding and location.

Tables 1 and 2 show coverage of the ENC items investigated according to location, type of funding, health facility structural variables, and mothers' characteristics. Pregnant women were referred to a specific health facility during the antenatal period in 58.7% of cases; this increased to 70.8% in privately funded facilities. Antenatal corticosteroids were used in 41% of cases where this was indicated; this declined to 20% in the North and Mid-West and rose to 63.1% at private facilities. Labour monitoring using a partograph had been done in only 48.5% of the deliveries (65.8% in the Southeast region). Continuous social support during the hospital stay was provided to 19.9% of women; the percentage was higher (40.3%) in cases where the mother had 15 or more years of schooling. Early skin-to-skin contact occurred in 26.3% of births and in 39.7% of vaginal deliveries. 59.1% of all newborns were breastfed in their first hour of birth, increasing to 73.4% in the North region.

In the logistic regression analyses, the factors highly associated with failures in referring pregnant woman to health facilities during the antenatal period were: maternities located in the Northern region, pregnant adolescents, seven or less years of schooling, and inadequate antenatal care. Women hospitalised in private facilities and those who underwent caesarean delivery were more likely to have a prior reference to the health facility (Tables 3 to 5).

In cases where the use of corticosteroids was indicated, the factors most associated with their non-use were health facility in the Mid-West region, inadequate equipment and medicines, and lacking a NICU or paediatrician on call 24/7. The lack of NICU beds and inadequate equipment and medicines maintained the association in the adjusted analysis.

1  
2  
3 Private funding and caesarean delivery were protective factors even in the adjusted model  
4  
5 (Tables 3 to 5).  
6  
7  
8  
9  
10  
11  
12  
13  
14  
15  
16  
17  
18  
19  
20  
21  
22  
23  
24  
25  
26  
27  
28  
29  
30  
31  
32  
33  
34  
35  
36  
37  
38  
39  
40  
41  
42  
43  
44  
45  
46  
47  
48  
49  
50  
51  
52  
53  
54  
55  
56  
57  
58  
59  
60

For peer review only

1  
2  
3  
4  
5  
6  
7  
8  
9  
10  
11  
12  
13  
14  
15  
16  
17  
18  
19  
20  
21  
22  
23  
24  
25  
26  
27  
28  
29  
30  
31  
32  
33  
34  
35  
36  
37  
38  
39  
40  
41  
42  
43  
44  
45  
46  
47

**Table 1 – Number and percentage (confidence interval) of Essential Newborn Care items according to geographical location, type of funding and structural variables (Brazil, 2011-2012)**

| Variables                          | Reference to health facility<br>(n=23.851) |      |             | Antenatal corticosteroids used<br>appropriately<br>(n=1.126) |      |             | Partograph used<br>(n=13.458) |      |             | Continuous social support<br>(n=23.879) |      |             | Early skin-to-skin contact<br>(n=23.894) |      |             | Breast feeding in first<br>hour of birth<br>(n=22.919) |      |             |
|------------------------------------|--------------------------------------------|------|-------------|--------------------------------------------------------------|------|-------------|-------------------------------|------|-------------|-----------------------------------------|------|-------------|------------------------------------------|------|-------------|--------------------------------------------------------|------|-------------|
|                                    | N                                          | %    | 95%CI       | N                                                            | %    | 95%CI       | n                             | %    | 95%CI       | n                                       | %    | 95%CI       | N                                        | %    | 95%CI       | n                                                      | %    | 95%CI       |
| <b>Macro-region</b>                |                                            |      |             |                                                              |      |             |                               |      |             |                                         |      |             |                                          |      |             |                                                        |      |             |
| North                              | 1,132                                      | 49.4 | [43.7,55.2] | 34                                                           | 24.2 | [13.3,40.1] | 325                           | 22.4 | [11.8,38.3] | 277                                     | 12.1 | [7.5,18.9]  | 589                                      | 25.7 | [19.1,33.5] | 1,511                                                  | 73.4 | [69.0,77.4] |
| Northeast                          | 3,770                                      | 54.7 | [51.4,58.0] | 160                                                          | 42.4 | [28.4,57.8] | 1,359                         | 33.1 | [24.7,42.7] | 1,017                                   | 14.7 | [10.5,20.3] | 1,857                                    | 26.9 | [22.3,32.0] | 3,353                                                  | 57.1 | [52.8,61.4] |
| Southeast                          | 6,271                                      | 61.8 | [58.7,64.9] | 196                                                          | 47.6 | [36.4,59.0] | 3,631                         | 65.8 | [59.3,71.8] | 2,517                                   | 24.8 | [19.6,30.8] | 2,561                                    | 25.2 | [21.2,29.7] | 4,868                                                  | 54.6 | [49.2,59.9] |
| South                              | 1,906                                      | 64.0 | [56.3,71.0] | 55                                                           | 47.8 | [39.8,55.9] | 880                           | 55.1 | [44.9,64.8] | 684                                     | 22.9 | [16.8,30.5] | 910                                      | 30.5 | [24.7,36.9] | 1,719                                                  | 64.1 | [56.0,71.4] |
| Mid-West                           | 925                                        | 59.7 | [53.0,66.1] | 13                                                           | 20.0 | [12.0,31.4] | 329                           | 42.0 | [28.4,57.0] | 261                                     | 16.8 | [11.1,24.7] | 376                                      | 24.2 | [16.8,33.5] | 923                                                    | 65.6 | [59.9,70.8] |
| <b>Brazil</b>                      | 14,004                                     | 58.7 | [56.7,60.7] | 458                                                          | 41.0 | [34.2,48.0] | 6,524                         | 48.5 | [43.8,53.1] | 4,756                                   | 19.9 | [17.0,23.1] | 6,293                                    | 26.3 | [23.9,29.0] | 12,374                                                 | 59.1 | [56.3,61.9] |
| <b>Location</b>                    |                                            |      |             |                                                              |      |             |                               |      |             |                                         |      |             |                                          |      |             |                                                        |      |             |
| Non-capital                        | 8,661                                      | 57.9 | [55.3,60.6] | 190                                                          | 36.5 | [30.1,43.3] | 3,514                         | 42.5 | [37.5,47.6] | 2,290                                   | 15.3 | [12.5,18.6] | 3,388                                    | 22.6 | [20.1,25.4] | 7,795                                                  | 58.9 | [55.1,62.6] |
| Capital                            | 5,342                                      | 60.0 | [57.0,62.9] | 268                                                          | 45.6 | [34.3,57.3] | 3,010                         | 58.1 | [49.6,66.1] | 2,466                                   | 27.7 | [22.0,34.1] | 2,905                                    | 32.6 | [27.6,37.9] | 4,579                                                  | 59.5 | [55.4,63.4] |
| <b>Funding</b>                     |                                            |      |             |                                                              |      |             |                               |      |             |                                         |      |             |                                          |      |             |                                                        |      |             |
| Public                             | 11,501                                     | 56.6 | [54.5,58.7] | 385                                                          | 38.8 | [31.3,46.8] | 6,375                         | 49.3 | [44.5,54.2] | 3,391                                   | 16.7 | [13.7,20.2] | 5,431                                    | 26.7 | [23.9,29.6] | 11,268                                                 | 63.4 | [60.4,66.4] |
| Private                            | 2,502                                      | 70.8 | [65.5,75.5] | 73                                                           | 63.1 | [52.4,72.7] | 149                           | 27.6 | [17.7,40.4] | 1,365                                   | 38.7 | [30.0,48.0] | 862                                      | 24.3 | [19.3,30.2] | 1,106                                                  | 34.9 | [27.8,42.7] |
| <b>Material resources &gt; 80%</b> |                                            |      |             |                                                              |      |             |                               |      |             |                                         |      |             |                                          |      |             |                                                        |      |             |
| No                                 | 920                                        | 56.2 | [48.7,63.4] | 8                                                            | 17.3 | [10.1,28.0] | 173                           | 17.3 | [7.4,35.2]  | 88                                      | 5.4  | [3.5,8.1]   | 331                                      | 20.2 | [11.8,32.5] | 890                                                    | 56.8 | [43.1,69.5] |

|                                   |        |      |             |     |      |             |       |      |             |       |      |             |       |      |             |        |      |             |
|-----------------------------------|--------|------|-------------|-----|------|-------------|-------|------|-------------|-------|------|-------------|-------|------|-------------|--------|------|-------------|
| Yes                               | 13,083 | 58.9 | [56.8,61]   | 453 | 42   | [35.1,49.3] | 6,351 | 51   | [46.2,55.8] | 4,668 | 21   | [17.9,24.4] | 5,962 | 26.8 | [24.2,29.5] | 11,484 | 53.8 | [50.8,56.7] |
| <b>Paediatrician on call 24/7</b> |        |      |             |     |      |             |       |      |             |       |      |             |       |      |             |        |      |             |
| No                                | 3,737  | 58.9 | [55.6,62.8] | 64  | 27.9 | [20.1,37.4] | 1,252 | 35.3 | [26.9,44.7] | 895   | 14.1 | [10.6,18.5] | 1,733 | 27.3 | [23.1,31.9] | 3,603  | 58.8 | [53.3,64.1] |
| Yes                               | 10,266 | 58.6 | [56.2,61.1] | 398 | 44.3 | [36.2,52.7] | 5,272 | 53.2 | [47.6,58.7] | 3,861 | 22   | [18.4,26.1] | 4,560 | 26   | [23,29.2]   | 8,771  | 52.2 | [48.7,55.8] |
| <b>Neonatal ICU</b>               |        |      |             |     |      |             |       |      |             |       |      |             |       |      |             |        |      |             |
| No                                | 5,015  | 56.7 | [52.8,60.5] | 29  | 14.8 | [10.2,20.8] | 1,284 | 33.3 | [26.5,40.9] | 1,135 | 12.9 | [9.4,17.1]  | 2,038 | 23.0 | [19.4,27.0] | 4,997  | 58.9 | [53.9,63.7] |
| Yes                               | 8,987  | 59.9 | [57.5,62.2] | 433 | 46.4 | [38.7,54.4] | 4,699 | 58.9 | [52.7,64.9] | 3,621 | 24.1 | [20.1,28.7] | 4,255 | 28.3 | [25.0,31.9] | 7,377  | 51.1 | [47.4,54.8] |
| <b>Kangaroo mother care</b>       |        |      |             |     |      |             |       |      |             |       |      |             |       |      |             |        |      |             |
| No                                | 9,739  | 58.3 | [55.8,60.8] | 203 | 33.8 | [28.1,40]   | 3,785 | 41.9 | [36.5,47.6] | 3,051 | 18.3 | [15.6,21.3] | 3,991 | 23.9 | [21.2,26.8] | 8,447  | 52.8 | [49.3,56.3] |
| Yes                               | 4,263  | 59.5 | [55.8,63.2] | 259 | 49.1 | [36.9,61.5] | 2,739 | 61.8 | [52.5,70.3] | 1,705 | 23.8 | [17.5,31.5] | 2,302 | 32.1 | [27.3-37.2] | 3,927  | 56.8 | [51.1,62.3] |

1  
2  
3  
4  
5  
6  
7  
8  
9  
10  
11  
12  
13  
14  
15  
16  
17  
18  
19  
20  
21  
22  
23  
24  
25  
26  
27  
28  
29  
30  
31  
32  
33  
34  
35  
36  
37  
38  
39  
40  
41  
42  
43  
44  
45  
46  
47

**Table 2 – Number and percentage (confidence interval) of Essential Newborn Care items, according to the mothers’ socio-economic variables (Brazil, 2011-2012)**

| Variables                        | Reference to health facility<br>(n=23.851) |      |             | Antenatal corticosteroids used<br>appropriately<br>(n=1.126) |      |             | Partograph used<br>(n=13.458) |      |             | Continuous social support<br>(n=23.879) |      |             | Early skin-to-skin contact<br>(n=23.894) |      |             | Breast feeding during<br>first hour of birth<br>(n=22.919) |      |             |
|----------------------------------|--------------------------------------------|------|-------------|--------------------------------------------------------------|------|-------------|-------------------------------|------|-------------|-----------------------------------------|------|-------------|------------------------------------------|------|-------------|------------------------------------------------------------|------|-------------|
|                                  | N                                          | %    | 95%CI       | n                                                            | %    | 95%CI       | n                             | %    | 95%CI       | n                                       | %    | 95%CI       | n                                        | %    | 95%CI       | n                                                          | %    | 95%CI       |
| <b>Mother’s age (years)</b>      |                                            |      |             |                                                              |      |             |                               |      |             |                                         |      |             |                                          |      |             |                                                            |      |             |
| 12 to 19                         | 2,385                                      | 52.3 | [49.5,55.1] | 88                                                           | 31.8 | [22.5,42.9] | 1,656                         | 49.5 | [44,54.9]   | 813                                     | 17.8 | [14.7,21.3] | 1,212                                    | 26.5 | [23.4,29.9] | 2,593                                                      | 59.8 | [56.5,63]   |
| 20 to 34                         | 10,065                                     | 60   | [57.9,62]   | 301                                                          | 42.8 | [35.9,50]   | 4,417                         | 48.6 | [44.1,53.3] | 3,315                                   | 19.7 | [16.8,23.1] | 4,434                                    | 26.4 | [23.9,29.1] | 8,739                                                      | 54   | [51.1,57]   |
| 35 or more                       | 1,549                                      | 61.9 | [58.6,65.1] | 73                                                           | 50.7 | [40.4,60.8] | 448                           | 43.6 | [37.9,49.5] | 624                                     | 24.9 | [20.9,29.3] | 645                                      | 25.7 | [22.6,29.1] | 1,042                                                      | 43.4 | [39.5,47.4] |
| <b>Mother’s years’ schooling</b> |                                            |      |             |                                                              |      |             |                               |      |             |                                         |      |             |                                          |      |             |                                                            |      |             |
| ≤ 7                              | 3,285                                      | 52.1 | [49.3,54.9] | 135                                                          | 37.9 | [28.2,48.6] | 1,939                         | 43.2 | [37.9,48.6] | 868                                     | 13.7 | [11.2,16.7] | 1,826                                    | 28.9 | [25.6,32.4] | 3,552                                                      | 60   | [56.9,63.1] |
| 8 to 10                          | 3,421                                      | 56.3 | [53.4,59.1] | 91                                                           | 33.7 | [25.1,43.6] | 2,047                         | 52   | [47,57]     | 1,016                                   | 16.7 | [13.3,20.7] | 1,614                                    | 26.5 | [23.4,29.9] | 3,464                                                      | 59.3 | [56,62.5]   |
| 11 to 14                         | 5,751                                      | 62.2 | [59.8,64.5] | 190                                                          | 45.9 | [37.6,54.5] | 2,355                         | 51.8 | [46.3,57.2] | 1,993                                   | 21.5 | [18,25.5]   | 2,261                                    | 24.4 | [22.1,26.9] | 4,525                                                      | 50.4 | [46.9,53.8] |
| 15 or more                       | 1,490                                      | 70.8 | [66.7,74.6] | 44                                                           | 53.1 | [40,65.7]   | 167                           | 38.7 | [31.7,46.1] | 848                                     | 40.3 | [34.2,46.8] | 565                                      | 26.8 | [21.1,33.4] | 774                                                        | 37.4 | [33.1,41.8] |
| <b>Antenatal care</b>            |                                            |      |             |                                                              |      |             |                               |      |             |                                         |      |             |                                          |      |             |                                                            |      |             |
| Adequate                         | 1,876                                      | 45.5 | [42.4,48.7] | 165                                                          | 35.1 | [26.2,45.3] | 1,261                         | 42.8 | [36.9,49.1] | 538                                     | 13   | [10.7,15.8] | 1,119                                    | 27.1 | [23.5,31]   | 2,257                                                      | 57.7 | [53.6,61.6] |
| Inadequate                       | 11,849                                     | 61.5 | [59.4,63.6] | 283                                                          | 44.9 | [37.6,52.3] | 5,148                         | 50.2 | [45.7,54.8] | 4,141                                   | 21.5 | [18.3,25]   | 5,067                                    | 26.3 | [23.8,28.9] | 9,874                                                      | 53.2 | [50.2,56.1] |
| <b>Type of delivery</b>          |                                            |      |             |                                                              |      |             |                               |      |             |                                         |      |             |                                          |      |             |                                                            |      |             |
| Vaginal/forceps                  | 6,215                                      | 54.1 | [51.7,56.5] | 158                                                          | 30.4 | [23.6,38.2] | 6,142                         | 53.4 | [48.4,58.4] | 2,382                                   | 20.7 | [16.8,25.3] | 4,564                                    | 39.7 | [36.1,43.4] | 7,478                                                      | 67.6 | [64.6,70.5] |
| Caesarean                        | 7,788                                      | 63   | [60.7,65.1] | 303                                                          | 50   | [41.4,58.5] | 382                           | 19.5 | [16,23.5]   | 2,374                                   | 19.2 | [16.3,22.4] | 1,729                                    | 13.9 | [12,16.2]   | 4,896                                                      | 41.3 | [38,44.6]   |

**Table 3 – Simple odds ratios (confidence interval) for non-use of Essential Newborn Care items, according to geographical location, type of funding and structural variables (Brazil, 2011-2012)**

|                                    | No reference to health facility | Antenatal<br>Corticosteroids not used | Partograph not used | No continuous social support | No early skin-to-skin contact | No breast feeding in first hour of birth |
|------------------------------------|---------------------------------|---------------------------------------|---------------------|------------------------------|-------------------------------|------------------------------------------|
|                                    | Simple OR (95%CI)               | Simple OR (95%CI)                     | Simple OR (95%CI)   | Simple OR (95%CI)            | Simple OR (95%CI)             | Simple OR (95%CI)                        |
| <b>Macro-region</b>                |                                 |                                       |                     |                              |                               |                                          |
| North                              | 1.65 [1.27,2.16]                | 2.85 [1.21,6.72]                      | 6.66 [2.95,15.02]   | 2.40 [1.30,4.41]             | 0.98 [0.63,1.52]              | 0.44 [0.32,0.59]                         |
| Northeast                          | 1.34 [1.11,1.61]                | 1.23 [0.57,2.63]                      | 3.90 [2.38,6.40]    | 1.91 [1.17,3.11]             | 0.92 [0.66,1.28]              | 0.90 [0.68,1.19]                         |
| South                              | 0.91 [0.64,1.29]                | 0.97 [0.56,1.68]                      | 1.57 [0.97,2.54]    | 1.11 [0.68,1.80]             | 0.77 [0.53,1.11]              | 0.67 [0.45,1.01]                         |
| Mid-West                           | 1.09 [0.81,1.47]                | 3.63 [1.75,7.52]                      | 2.65 [1.35,5.21]    | 1.63 [0.92,2.90]             | 1.06 [0.63,1.76]              | 0.63 [0.46,0.88]                         |
| Southeast                          | 1 (-)                           | 1 (-)                                 | 1 (-)               | 1 (-)                        | 1 (-)                         | 1 (-)                                    |
| <b>Location</b>                    |                                 |                                       |                     |                              |                               |                                          |
| Not capital                        | 1.09 [0.92,1.28]                | 1.45 [0.84,2.49]                      | 1.88 [1.26,2.79]    | 2.12 [1.45,3.10]             | 1.65 [1.25,2.18]              | 1.02 [0.82,1.28]                         |
| Capital                            | 1 (-)                           | 1 (-)                                 | 1 (-)               | 1 (-)                        | 1 (-)                         | 1 (-)                                    |
| <b>Type of funding</b>             |                                 |                                       |                     |                              |                               |                                          |
| Private                            | 0.54 [0.42,0.70]                | 0.38 [0.22,0.65]                      | 2.55 [1.39,4.68]    | 0.32 [0.20,0.50]             | 1.13 [0.81,1.57]              | 3.24 [2.28,4.60]                         |
| Public                             | 1 (-)                           | 1 (-)                                 | 1 (-)               | 1 (-)                        | 1 (-)                         | 1 (-)                                    |
| <b>Material resources &gt; 80%</b> |                                 |                                       |                     |                              |                               |                                          |



1  
2  
3  
4  
5  
6  
7  
8  
9  
10  
11  
12  
13  
14  
15  
16  
17  
18  
19  
20  
21  
22  
23  
24  
25  
26  
27  
28  
29  
30  
31  
32  
33  
34  
35  
36  
37  
38  
39  
40  
41  
42  
43  
44  
45  
46  
47

|                                   |                  |                  |                   |                  |                  |                  |
|-----------------------------------|------------------|------------------|-------------------|------------------|------------------|------------------|
| Adequate                          | 1.12 [0.81,1.54] | 3.46 [1.76,6.82] | 4.99 [1.85,13.45] | 4.69 [2.87,7.67] | 1.44 [0.75,2.79] | 0.93 [0.52,1.66] |
| Inadequate                        | 1 (-)            | 1 (-)            | 1 (-)             | 1 (-)            | 1 (-)            | 1 (-)            |
| <b>Paediatrician on call 24/7</b> |                  |                  |                   |                  |                  |                  |
| No                                | 0.99 [0.81,1.21] | 2.06 [1.16,3.64] | 2.09 [1.31,3.32]  | 1.72 [1.16,2.56] | 0.94 [0.71,1.24] | 0.81 [0.60,1.09] |
| Yes                               | 1 (-)            | 1 (-)            | 1 (-)             | 1 (-)            | 1 (-)            | 1 (-)            |
| <b>Kangaroo mother care</b>       |                  |                  |                   |                  |                  |                  |
| No                                | 1.05 [0.86,1.28] | 1.89 [1.08,3.32] | 2.24 [1.39,3.59]  | 1.40 [0.92,2.12] | 1.51 [1.15,1.97] | 1.35 [0.99,1.83] |
| Yes                               | 1 (-)            | 1 (-)            | 1 (-)             | 1 (-)            | 1 (-)            | 1 (-)            |
| <b>Neonatal ICU beds</b>          |                  |                  |                   |                  |                  |                  |
| No                                | 1.14 [0.94,1.38] | 5.00 [2.97,8.43] | 2.88 [1.88,4.41]  | 2.17 [1.43,3.27] | 1.32 [1.01,1.74] | 0.82 [0.62,1.08] |
| Yes                               | 1 (-)            | 1 (-)            | 1 (-)             | 1 (-)            | 1 (-)            | 1 (-)            |

**Table 4 – Simple odds ratios (confidence interval) of non-use of Essential Newborn Care items, according to the mothers' socio-economic variables (Brazil, 2011-2012)**

|                                  | No reference to health facility | Antenatal<br>Corticosteroids not used | Partograph not used | No continuous social support | No early skin-to-skin contact | No breast feeding in first hour of birth |
|----------------------------------|---------------------------------|---------------------------------------|---------------------|------------------------------|-------------------------------|------------------------------------------|
|                                  | Simple OR (95%CI)               | Simple OR (95%CI)                     | Simple OR (95%CI)   | Simple OR (95%CI)            | Simple OR (95%CI)             | Simple OR (95%CI)                        |
| <b>Mother's age (years)</b>      |                                 |                                       |                     |                              |                               |                                          |
| 12 to 19                         | 1.37 [1.23,1.52]                | 1.60 [1.08,2.38]                      | 0.97 [0.86,1.09]    | 1.14 [0.96,1.34]             | 0.99 [0.89,1.11]              | 0.76 [0.68,0.86]                         |
| 20 to 34                         | 1 (-)                           | 1 (-)                                 | 1 (-)               | 1 (-)                        | 1 (-)                         | 1 (-)                                    |
| 35 or more                       | 0.92 [0.82,1.04]                | 0.73 [0.50,1.05]                      | 1.23 [1.03,1.45]    | 0.74 [0.65,0.85]             | 1.04 [0.91,1.18]              | 1.45 [1.28,1.64]                         |
| <b>Mother's years' schooling</b> |                                 |                                       |                     |                              |                               |                                          |
| ≤ 7                              | 2.23 [1.81,2.75]                | 1.85 [0.99-3.48]                      | 0.83 [0.60,1.16]    | 4.24 [3.05,5.89]             | 0.90 [0.64,1.27]              | 0.34 [0.27,0.42]                         |
| 8 to 10                          | 1.89 [1.53,2.32]                | 2.22 [1.14,4.31]                      | 0.58 [0.41,0.81]    | 3.37 [2.40,4.73]             | 1.01 [0.73,1.42]              | 0.38 [0.30,0.47]                         |
| 11 to 14                         | 1.48 [1.23,1.77]                | 1.33 [0.71,2.48]                      | 0.59 [0.42,0.81]    | 2.46 [1.88,3.24]             | 1.13 [0.84,1.54]              | 0.54 [0.46,0.65]                         |
| 15 or more                       | 1 (-)                           | 1 (-)                                 | 1 (-)               | 1 (-)                        | 1 (-)                         | 1 (-)                                    |
| <b>Antenatal care</b>            |                                 |                                       |                     |                              |                               |                                          |
| Adequate                         | 1.91 [1.68,2.18]                | 1.50 [1.00,2.26]                      | 1.34 [1.13,1.60]    | 1.83 [1.51,2.21]             | 0.96 [0.82,1.13]              | 0.68 [0.5,0.78]                          |
| Inadequate                       | 1 (-)                           | 1 (-)                                 | 1                   | 1 (-)                        | 1 (-)                         | 1 (-)                                    |
| <b>Type of delivery</b>          |                                 |                                       |                     |                              |                               |                                          |

1  
2  
3  
4  
5  
6  
7  
8  
9  
10  
11  
12  
13  
14  
15  
16  
17  
18  
19  
20  
21  
22  
23  
24  
25  
26  
27  
28  
29  
30  
31  
32  
33  
34  
35  
36  
37  
38  
39  
40  
41  
42  
43  
44  
45  
46  
47

|           |                  |                  |                  |                  |                  |                  |
|-----------|------------------|------------------|------------------|------------------|------------------|------------------|
| Caesarean | 0.69 [0.63,0.77] | 0.44 [0.29,0.65] | 4.74 [3.59,6.25] | 1.10 [0.85,1.42] | 4.06 [3.38,4.88] | 3.04 [2.62,3.53] |
| Vaginal   | 1 (-)            | 1 (-)            | 1 (-)            | 1 (-)            | 1 (-)            | 1 (-)            |

---

For peer review only

**Table 5 – Adjusted odds ratios (confidence interval) for non-use of Essential Newborn Care items, according to geographical location, type of funding, structural variables and mothers' socio-economic variables (Brazil, 2011-2012)**

|                                 | No reference to health facility | Antenatal Corticosteroids not used | Partograph not used | No continuous social support | No early skin-to-skin contact | No breast feeding in first hour of birth |
|---------------------------------|---------------------------------|------------------------------------|---------------------|------------------------------|-------------------------------|------------------------------------------|
|                                 | Adjusted OR (95%CI)             | Adjusted OR (95%CI)                | Adjusted OR (95%CI) | Adjusted OR (95%CI)          | Adjusted OR (95%CI)           | Adjusted OR (95%CI)                      |
| <b>Macro-region</b>             |                                 |                                    |                     |                              |                               |                                          |
| North                           | X                               | X                                  | 6.94 [2.89,16.82]   | 2.14 [1.14,4.02]             | X                             | 0.48 [0.35,0.65]                         |
| Northeast                       | X                               | X                                  | 3.58 [2.15,5.95]    | 1.97 [1.17,3.31]             | X                             | 0.92 [0.69,1.23]                         |
| South                           | X                               | X                                  | 1.42 [0.83,2.45]    | 1.06 [0.64,1.76]             | X                             | 0.64 [0.42,0.97]                         |
| Mid-West                        | X                               | X                                  | 2.82 [1.52,5.22]    | 2.27 [1.21,4.29]             | X                             | 0.56 [0.37,0.84]                         |
| Southeast                       | X                               | X                                  | 1                   | 1                            | X                             | 1                                        |
| <b>Location</b>                 |                                 |                                    |                     |                              |                               |                                          |
| No capital                      | X                               | X                                  | 1.62 [1.01,2.60]    | 2.25 [1.47,3.46]             | 1.66 [1.23,2.22]              | X                                        |
| Capital                         | X                               | X                                  | 1                   | 1                            | 1                             | X                                        |
| <b>Type of funding</b>          |                                 |                                    |                     |                              |                               |                                          |
| Private                         | 0.71 [0.55,0.93]                | 0.55 [0.31,0.97]                   | 3.36 [1.75,6.49]    | 0.42 [0.26,0.67]             | X                             | 1.87 [1.28,2.74]                         |
| Public                          | 1                               | 1                                  | 1                   | 1                            | X                             | 1                                        |
| <b>Material resources ≥ 80%</b> |                                 |                                    |                     |                              |                               |                                          |
| Adequate                        | X                               | 2.16 [1.17,4.01]                   | X                   | 3.77 [2.13,6.68]             | X                             | X                                        |
| Inadequate                      | X                               | 1                                  | X                   | 1                            | X                             | X                                        |

1  
2  
3  
4  
5  
6  
7  
8  
9  
10  
11  
12  
13  
14  
15  
16  
17  
18  
19  
20  
21  
22  
23  
24  
25  
26  
27  
28  
29  
30  
31  
32  
33  
34  
35  
36  
37  
38  
39  
40  
41  
42  
43  
44  
45  
46  
47

**Neonatal ICU beds**

|     |   |                  |                  |   |   |   |
|-----|---|------------------|------------------|---|---|---|
| No  | X | 3.93 [2.34,6.66] | 2.08 [1.24,3.48] | x | X | X |
| Yes | X | 1                | 1                | x | X | X |

**Mother's age (years)**

|            |                  |   |                  |                  |   |                  |
|------------|------------------|---|------------------|------------------|---|------------------|
| 12 to 19   | 1.17 [1.06,1.29] |   | 0.85 [0.74,0.97] | 0.76 [0.65,0.90] |   | 1.07 [0.95,1.20] |
| 20 to 34   | 1                | X | 1                | 1                | X | 1                |
| 35 or more | 1.00 [0.88,1.13] | X | 1.30 [1.07,1.58] | 0.94 [0.81,1.08] | x | 1.20 [1.05,1.36] |

**Mother's years' schooling**

|            |                  |   |   |                  |   |                  |
|------------|------------------|---|---|------------------|---|------------------|
| ≤ 7        | 1.47 [1.22,1.78] | X | X | 2.34 [1.81,3.02] | x | 0.76 [0.62,0.95] |
| 8 to 10    | 1.32 [1.10,1.60] | X | X | 2.33 [1.81,3.00] | x | 0.79 [0.64,0.97] |
| 11 to 14   | 1.20 [1.01,1.42] | X | X | 1.89 [1.54,2.32] | x | 0.90 [0.75,1.08] |
| 15 or more | 1                | X | X | 1                | x | 1                |

**Antenatal care**

|            |                  |   |                  |                  |   |                  |
|------------|------------------|---|------------------|------------------|---|------------------|
| Adequate   | 1.67 [1.47,1.89] | X | 1.25 [1.04,1.49] | 1.42 [1.16,1.73] | x | 0.96 [0.84,1.09] |
| Inadequate | 1                | X | 1                | 1                | x | 1                |

**Type of delivery**

|           |                  |                  |                  |   |                  |                  |
|-----------|------------------|------------------|------------------|---|------------------|------------------|
| Caesarean | 0.84 [0.77,0.91] | 0.55 [0.36,0.84] | 4.93 [3.77,6.46] | X | 3.07 [3.37,4.90] | 2.55 [2.21,2.96] |
| Vaginal   | 1                | 1                | 1                | X | 1                | 1                |

Items filled with x are variables excluded from the model.

1  
2  
3 Factors associated with the non-use of a partograph in the adjusted analysis were  
4 private funding, a caesarean delivery, and an absence of NICU beds (Tables 3 to 5).  
5  
6

7  
8 The factors most involved in the absence of continuous social support were: health  
9 facilities outside of a state capital, having less than 7 years of schooling, and inadequate  
10 antenatal care, while private funding was a protective factor (Tables 3 to 5).  
11  
12  
13

14  
15 The absence of early skin-to-skin contact was most associated with a caesarean  
16 delivery and health facilities without KMC or NICU beds; the association with a caesarean  
17 delivery persisted, even after an adjusted analysis (Tables 3 to 5).  
18  
19  
20

21  
22 Breast feeding in the first hour of birth was less frequent in private maternities,  
23 maternal age  $\geq 35$  years, and a caesarean delivery; these factors continued to be associated in  
24 the adjusted analysis. Mothers having less schooling breastfed more, even in the adjusted  
25 analysis (Tables 3 to 5).  
26  
27  
28  
29  
30  
31  
32  
33  
34  
35  
36  
37  
38  
39  
40  
41  
42  
43  
44  
45  
46  
47  
48  
49  
50  
51  
52  
53  
54  
55  
56  
57  
58  
59  
60

## DISCUSSION

In Brazil, neonatal morbidity and mortality remains high despite universal antenatal care availability and hospital delivery, highlighting a possible low quality in delivery and birth assistances. The widespread availability of ENC items can contribute effectively to change this scenario.

This is not the case, because our study has pointed out that coverage of the ENC items in Brazil is low and varies depending on the characteristics of both the mother and the health facility where the delivery occurs.

The requirement for pregnant women to be enrolled with a referral health facility during the antenatal period has been regulated in Brazil since 2007.[13] However, the percentage of pregnant women informed of the referral maternity, where they will be admitted to give birth is still small, indicating insufficient integration between antenatal services and childbirth care facilities. This may lead pregnant women in labour to peregrinate in search of a bed for admission and may contribute to the fact that only 10% of high-risk births occur in public maternities considered adequate for neonatal care in Brazil. This situation was highlighted by a prior study using data from the "Birth in Brazil" survey.[14] Such situations certainly place women's health at risk, in addition to increasing the likelihood of neonatal death.[2]

Antenatal corticosteroids were used in only 41% of indicated cases and is another marked deficiency in the quality of antenatal care offered in Brazil. Every year, thousands of preterm babies are exposed to neonatal respiratory distress syndrome and to the risk of death from causes considered reducible if women receive adequate care during pregnancy.[15][10]. Corticosteroid use can avert 20 to 40% of neonatal deaths related to complications from preterm birth.[16] The fact that hospitals with private funding were more likely to use antenatal corticosteroids could be explained by mothers having access to better quality

1  
2  
3 antenatal care and by a more formal link between antenatal and childbirth care than in  
4  
5 publicly funded hospitals.  
6

7  
8 It is estimated that the use of a partograph can reduce early neonatal deaths from  
9  
10 asphyxia by 40%. [16] In Brazil, the use of partographs is more frequent (48,5%) than in  
11  
12 Uganda (29%),[17] but the use of partographs is still very far from the recommended 90%.[16]  
13  
14 It's worrying that those women who underwent caesarean delivery were less likely to have  
15  
16 their labour monitored and, consequently, they were more likely to suffer undesirable  
17  
18 maternal and/or neonatal outcomes.  
19

20  
21 In Brazil, all women are entitled to a companion during their hospital stay for  
22  
23 delivery.[18] This was the item with the lowest coverage (< 20%). A previous study, based on  
24  
25 the "Birth in Brazil" project,[19] focussing on the implementation of the requirement of a  
26  
27 continuous social support during a hospital stay for childbirth, found that the main reason for  
28  
29 not having companion during delivery was prohibition by the hospital and that only 1.4% of  
30  
31 women did not wish to be accompanied. This study showed an association between  
32  
33 inadequate hospital structure and less accomplishment of ENC recommendations.  
34

35  
36 The coverage of early skin-to-skin contact in Brazil is lower than in Argentina (83%),  
37  
38 similar to Nagpur (32%) and Kenya (25.1%), and is higher than Pakistan (2%).[20] Newborns by  
39  
40 vaginal delivery in health facilities in capital cities were more likely to experience skin-to-skin  
41  
42 contact and protection from hypothermia, which reduces the risk of infection, coagulation  
43  
44 disorders, neonatal respiratory distress syndrome, and cerebroventricular haemorrhage,  
45  
46 directly influencing neonatal mortality and morbidity. [21] It is estimated that proper  
47  
48 prevention and management of hypothermia could avert 40% of neonatal mortality.[22]  
49

50  
51  
52 Early breast feeding within the first hour of birth is a factor associated with lower  
53  
54 neonatal mortality,[23] averting around 10% of neonatal deaths.[22] This study found the  
55  
56 coverage to be around 59% in Brazil, which is slightly higher than the mean of 50% found by  
57  
58



1  
2  
3 Requejo et al.[5] for the 75 countries responsible for 95% of neonatal deaths. Brazil's coverage,  
4  
5 classified as good according to the WHO,[24] is lower than the one found in Zambia (92%)[20]  
6  
7 and is higher than India (36.4%), Bangladesh (24%), or Pakistan (8.5%).[25]  
8  
9

10 A study in India,[26] which examined more than 12,000 births, reported that, after  
11  
12 training in the ENC program, coverage of breast feeding in the first hour of birth increased  
13  
14 from 73.1% to 88.4% and early skin-to-skin contact increased from 50.2% to 81.7%, whilst  
15  
16 neonatal mortality decreased.  
17  
18

19 Data from a meta-analysis,[27] covering more than half a million women in 31  
20  
21 countries, suggested an inverse association between caesarean delivery and early breast  
22  
23 feeding, corroborating the association found in this study. This fact may be related to  
24  
25 anaesthesia and post-partum surgical procedures.[28] As the frequency of caesarean delivery  
26  
27 in Brazil has reached high levels of around 56%,[29] the situation calls for interventions to  
28  
29 evaluate more judiciously the options available for this kind of delivery. To reduce neonatal  
30  
31 mortality in Brazil, all mothers, regardless of mode of delivery, should be encouraged to  
32  
33 breastfeed early. Caesarean delivery can delay the onset of lactation, disrupt mother-infant  
34  
35 interaction, or inhibit infant suckling. [27] Lassi et al. describe a 44% reduction in neonatal  
36  
37 mortality when breast feeding began in the first 24 hours of birth.[30] In another study of  
38  
39 more than 10,000 newborns in Brazil,[28] the delivery location was described as a pivotal  
40  
41 factor for breast feeding, which was not found in this study.  
42  
43  
44

45 Limitations of the study: The "Birth in Brazil" study was conducted in hospitals with  
46  
47 more than 500 deliveries per year, and 80% of childbirths in the country are in these hospitals.  
48  
49 Smaller hospitals should have worst structures, which would result in an underestimation of  
50  
51 the inadequacy of health care. The study data were based on information provided by women  
52  
53 early after delivery and by managers, rather than on observation of performance of the  
54  
55 essential care items. This study was not originally designed to examine the ENC and thus did  
56  
57  
58  
59  
60

1  
2  
3 not include all the items of the program. Nonetheless, the items investigated are described  
4 worldwide as evidence-based interventions that are cost-effective in reducing neonatal  
5 mortality and morbidity.[16][30]  
6  
7  
8  
9

10 The relationships identified in this study, between inadequate structures at health  
11 facilities and lesser coverage of items, such as the use of antenatal corticosteroids and  
12 partographs during labour, points to a need for interventions mostly in facilities with less  
13 adequate structure.  
14  
15  
16  
17

18 The finding that caesarean delivery is a risk factor for not having early skin-to-skin  
19 contact and breast feeding in the first hour of birth – which are linked to the reduction of  
20 neonatal morbidity and mortality – highlights the importance of the prevention of  
21 hypothermia, and of facilitating breast feeding in caesarean deliveries. Moreover, it also shows  
22 the need to implement strategies to reduce the rate of caesarean deliveries in Brazil, which  
23 was almost 56% in this study,[29] and is identified as a hindering factor for the mother and  
24 child early bonding, a crucial period involving a great many changes.  
25  
26  
27  
28  
29  
30  
31  
32  
33

34 In Brazil, South and Southeast regions have the lowest rate of neonatal mortality,[2]  
35 and have more reference hospitals for the care of high-risk pregnancies and neonates.[9]  
36 North and Northeast regions have the highest rate of neonatal mortality,[2] have less  
37 reference hospitals,[9] have less access to antenatal care services and to these hospitals, the  
38 majority located in state capitals.[31]  
39  
40  
41  
42  
43  
44  
45

46 The regional differences, as in other countries,[32] reveal inequities in the distribution  
47 of health funding and exemplify the phenomenon described as the Inverse Care Law,[33]  
48 where individuals with lesser financial means and greater need receive worse and less-  
49 qualified health care.  
50  
51  
52  
53  
54  
55  
56  
57  
58  
59  
60

1  
2  
3 The essential interventions here investigated are simple and inexpensive and should be  
4 integrated into existing programs. The low and uneven coverage of such simple health  
5 technologies indicates the necessity for widespread intervention to improve perinatal  
6 outcomes. Related coverage data should also be collected frequently in routine national  
7 surveys.  
8  
9  
10  
11  
12

#### 13 14 CONFLICT OF INTERESTS

15  
16  
17 There are no conflicts of interest.  
18

#### 19 20 CONTRIBUTORSHIP STATEMENT

21  
22 MASM, RQG and SDA participated in the design, analysis, and data interpretation, and  
23 in the drafting and final approval of the manuscript; VEP collaborated in the database  
24 organization and statistical analysis; MCL participated in the design of the article, oversaw the  
25 analysis, and made the final revision of the article. All co-authors contributed to the  
26 improvement of the article.  
27  
28  
29  
30  
31  
32  
33  
34  
35  
36

#### 37 38 FUNDING

39  
40 National Council for Scientific and Techno-logical Development (CNPq); Science and  
41 Technology Department, Secretariat of Science, Technology, and Strategic Inputs, Brazilian  
42 Ministry of Health; National School of Public Health, Oswaldo Cruz Foundation (INOVA  
43 Project); and Foundation for supporting Research in the State of Rio de Janeiro (Faperj).  
44  
45  
46  
47  
48  
49  
50

#### 51 52 ACKNOWLEDGEMENTS

53  
54 This paper was edited professionally by Scientific Editing Company Ltd, Scotland.  
55  
56  
57  
58  
59  
60

1  
2  
3  
4  
5 NO ADDITIONAL DATA AVAILABLE.  
6  
7

8 KEY MESSAGES  
9  
10  
11  
12

13 WHAT IS ALREADY KNOW ON THIS SUBJECT?  
14  
15

16 Neonatal mortality is yet high in low and middle income countries.  
17

18 Health technologies like Essential Newborn Care can reduce neonatal mortality.  
19  
20  
21  
22  
23

24 WHAT THIS STUDY ADDS?  
25  
26

27 In Brazil, Essential Newborn Care items coverage is low. Less adequate structure facilities must  
28 be prioritized in interventions to scale up Essential Newborn care practices, included in a policy  
29 health.  
30  
31  
32  
33  
34  
35  
36  
37  
38  
39  
40  
41  
42  
43  
44  
45  
46  
47  
48  
49  
50  
51  
52  
53  
54  
55  
56  
57  
58  
59  
60

## LIST OF REFERENCES

- 1 Brasil. Ministério da Saúde. DATASUS. Dep. Informática do SUS. 2015.<http://tabnet.datasus.gov.br/cgi/tabcgi.exe?idb2012/f07.def>
- 2 Lansky S, Friche AA de L, Silva AAM da, *et al.* Pesquisa nascer no Brasil : perfil da mortalidade neonatal e avaliação da assistência à gestante e ao recém-nascido. *Cad Saúde Pública* 2014;**30**:192–207. doi:10.1590/0102-311X00133213
- 3 Black RE, Cousens S, Johnson HL, *et al.* Global, regional, and national causes of child mortality in 2008: a systematic analysis. *Lancet* 2010;**375**:1969–87. doi:10.1016/S0140-6736(10)60549-1
- 4 Narayanan I, Rose M, Cordero D, *et al.* The Components of Essential Newborn Care. 2004.
- 5 Requejo JH, Bryce J, Barros AJD, *et al.* Countdown to 2015 and beyond: fulfilling the health agenda for women and children. *Lancet (London, England)* Published Online First: 2015. doi:10.1016/S0140-6736(14)60925-9
- 6 Danzhen You, Lucia Hug, Simon Ejdemyr, Jan Beise PI, World. Child Mortality 2015. *UNICEF WHO World Bank Gr United Nations* 2015;;74.[www.childmortality.org](http://www.childmortality.org)
- 7 Leal M do C, Moura Da Silva AA, Dias MAB, *et al.* Birth in Brazil: national survey into labour and birth. *Reprod Health* 2012;**9**. doi:10.1186/1742-4755-9-15
- 8 Vasconcellos MTL, Silva PL do N, Pereira APE, *et al.* Sampling design for the Birth in Brazil : National Survey into Labor and Birth Desenho da amostra Nascer no Brasil : Pesquisa Nacional sobre Parto e Nascimento Diseño de la muestra Nacer en Brasil :

- 1  
2  
3 Encuesta Nacional sobre Partos y Nascimientos en Brasil. *Cad Saude Publica*  
4  
5 2014;**30**:S49–58. doi:10.1590/0102-311X00176013  
6  
7  
8 9 Bittencourt SDA, Reis LGC, Ramos MM, *et al.* Structure in Brazilian maternity hospitals:  
9  
10 key characteristics for quality of obstetric and neonatal care. *Cad Saude Publica*  
11  
12 2014;**30 Suppl 1**:S1-12. doi:10.1590/0102-311X00176913  
13  
14  
15 10 Roberts D, Brown J, Medley N, *et al.* Antenatal corticosteroids for accelerating fetal lung  
16  
17 maturation for women at risk of preterm birth. *Cochrane Database Syst. Rev.*  
18  
19 2017;**2017**. doi:10.1002/14651858.CD004454.pub3  
20  
21  
22 11 Pereira APE, Leal M do C, da Gama SGN, *et al.* Determining gestational age based on  
23  
24 information from the Birth in Brazil study. *Cad saude pública* 2014;**30 Suppl 1**:S1-12.  
25  
26 doi:10.1590/0102-311X00160313  
27  
28  
29 12 Ministério da Saúde. Portaria n° 1071, de 04 de julho de 2005. Institui a Política  
30  
31 Nacional de Atenção ao Paciente Crítico. *Diário Of da União* 2005.  
32  
33  
34 13 BRASIL. Lei n° 11.634, de 27 de dezembro de 2007. Dispõe sobre o direito da gestante  
35  
36 ao conhecimento e a vinculação à maternidade onde receberá assistência, no âmbito  
37  
38 do Sistema Único de Saúde-SUS. 2007.  
39  
40  
41 14 Bittencourt SDA, Gurgel RQ, Menezes MAS, *et al.* Neonatal care in Brazil: hospital  
42  
43 structure and adequacy according to newborn obstetric risk. *Paediatr Int Child Health*  
44  
45 2015;**35**:206–12. doi:10.1179/2046905515Y.0000000028  
46  
47  
48 15 Malta DC, França E, Abreu DX De, *et al.* Atualização da lista de causas de mortes  
49  
50 evitáveis (5 a 74 anos de idade) por intervenções do Sistema Único de Saúde do Brasil.  
51  
52 *Epidemiol e Serviços Saúde* 2010;**20**:409–12. doi:10.5123/S1679-49742011000300016  
53  
54  
55 16 Darmstadt GL, Bhutta ZA, Cousens S, *et al.* Evidence-based, cost-effective interventions:  
56  
57 How many newborn babies can we save? *Lancet* 2005;**365**:977–88. doi:10.1016/S0140-

- 1  
2  
3 6736(05)71088-6  
4  
5  
6 17 Wilunda C, Oyerinde K, Putoto G, *et al.* Availability, utilisation and quality of maternal  
7 and neonatal health care services in Karamoja region, Uganda: a health facility-based  
8 survey. *Reprod Health* 2015;**12**. doi:10.1186/s12978-015-0018-7  
9  
10  
11  
12 18 Brasil. Lei nº 11.108, de 07 de abril de 2005. Dispõe sobre o direito da parturiente à  
13 presença de acompanhante durante o trabalho de parto, parto e pós-parto imediato,  
14 no âmbito do Sistema Único de Saúde-SUS. *Diário Of da União* 2005.  
15  
16  
17 19 Diniz CSG, D’Orsi E, Domingues RMSM, *et al.* Implementação da presença de  
20 acompanhantes durante a internação para o parto : dados da pesquisa nacional Nascer  
21 no Brasil. *Cad Saude Publica* 2014;**30**:S140–53. doi:10.1590/0102-311X00127013  
22  
23  
24 20 Dhaded SM, Somannavar MS, Vernekar SS, *et al.* Neonatal mortality and coverage of  
25 essential newborn interventions 2010 - 2013: a prospective, population-based study  
26 from low-middle income countries. *Reprod Health* 2015;**12**:S6. doi:10.1186/1742-4755-  
27 12-S2-S6  
28  
29  
30 21 Lyu Y, Shah PS, Ye XY, *et al.* Association Between Admission Temperature and Mortality  
31 and Major Morbidity in Preterm Infants Born at Fewer Than 33 Weeks’ Gestation. *JAMA*  
32 *Pediatr* 2015;**169**:e150277. doi:10.1001/jamapediatrics.2015.0277  
33  
34  
35 22 Darmstadt GL, Walker N, Lawn JE, *et al.* Saving newborn lives in Asia and Africa: Cost  
36 and impact of phased scale-up of interventions within the continuum of care. *Health*  
37 *Policy Plan* 2008;**23**:101–17. doi:10.1093/heapol/czn001  
38  
39  
40 23 Khan J, Vesel L, Bahl R, *et al.* Timing of Breastfeeding Initiation and Exclusivity of  
41 Breastfeeding During the First Month of Life: Effects on Neonatal Mortality and  
42 Morbidity—A Systematic Review and Meta-analysis. *Matern Child Health J*  
43 2015;**19**:468–79.  
44  
45  
46  
47  
48  
49  
50  
51  
52  
53  
54  
55  
56  
57  
58  
59  
60

- 1  
2  
3 24 WHO (World Health Organization), UNICEF (United Nations Children's Fund). Global  
4 Strategy for Infant and Young Child Feeding. *World Heal Organ* 2003;:1–30. doi:ISBN 92  
5 4 156221 8  
6  
7  
8  
9  
10 25 Adhikari M, Khanal V, Karkee R, *et al.* Factors associated with early initiation of  
11 breastfeeding among Nepalese mothers: further analysis of Nepal Demographic and  
12 Health Survey, 2011. *Int Breastfeed J* 2014;9:21. doi:10.1186/1746-4358-7-1  
13  
14  
15  
16 26 Goudar SS, Dhaded SM, McClure EM, *et al.* ENC training reduces perinatal mortality in  
17 Karnataka, India. *J Matern Neonatal Med* 2012;25:568–74.  
18  
19 doi:10.3109/14767058.2011.584088  
20  
21  
22  
23 27 Prior E, Santhakumaran S, Gale C, *et al.* Breastfeeding after cesarean delivery: A  
24 systematic review and meta-analysis of world literature. *Am J Clin Nutr* 2012;95:1113–  
25  
26 35. doi:10.3945/ajcn.111.030254  
27  
28  
29  
30 28 Boccolini CS, Carvalho ML, Oliveira MIC, *et al.* Fatores associados à amamentação na  
31 primeira hora de vida. *Rev Saude Publica* 2011;45:69–78. www.scielo.br/rsp  
32  
33  
34  
35 29 Domingues RMSM, Dias MAB, Nakamura-Pereira M, *et al.* Processo de decisão pelo tipo  
36 de parto no Brasil : da preferência inicial das mulheres à via de parto final. *Cad Saude*  
37  
38 *Publica* 2014;30:1–16. doi:S0102-311X2014001300017 [pii]  
39  
40  
41  
42 30 Lassi ZS, Middleton PF, Crowther C, *et al.* Interventions to Improve Neonatal Health and  
43  
44 Later Survival: An Overview of Systematic Reviews. *EBioMedicine* Published Online First:  
45  
46 2015. doi:10.1016/j.ebiom.2015.05.023  
47  
48  
49 31 Viellas EF, Domingues RMSM, Dias MAB, *et al.* Prenatal care in Brazil. *Cad Saude Publica*  
50  
51 2014;30 Suppl 1:S1-15. doi:S0102-311X2014001300016 [pii]  
52  
53  
54 32 Lassi ZS, Salam RA, Das JK, *et al.* Essential interventions for maternal, newborn and child  
55  
56 health: background and methodology. *Reprod Health* 2014;11:S1. doi:10.1186/1742-  
57  
58  
59



1  
2  
3  
4  
5  
6  
7  
8  
9  
10  
11  
12  
13  
14  
15  
16  
17  
18  
19  
20  
21  
22  
23  
24  
25  
26  
27  
28  
29  
30  
31  
32  
33  
34  
35  
36  
37  
38  
39  
40  
41  
42  
43  
44  
45  
46  
47  
48  
49  
50  
51  
52  
53  
54  
55  
56  
57  
58  
59  
60

4755-11-S1-S1

33 Tudor Hart J. THE INVERSE CARE LAW. *Lancet* 1971;**297**:405–12. doi:10.1016/S0140-

6736(71)92410-X

For peer review only

# BMJ Open

## HEALTH FACILITY STRUCTURE AND MATERNAL CHARACTERISTICS RELATED TO ESSENTIAL NEWBORN CARE IN BRAZIL: A CROSS-SECTIONAL STUDY

|                                 |                                                                                                                                                                                                                                                                                                                                                                                                                                                                                                                                                                                                                 |
|---------------------------------|-----------------------------------------------------------------------------------------------------------------------------------------------------------------------------------------------------------------------------------------------------------------------------------------------------------------------------------------------------------------------------------------------------------------------------------------------------------------------------------------------------------------------------------------------------------------------------------------------------------------|
| Journal:                        | <i>BMJ Open</i>                                                                                                                                                                                                                                                                                                                                                                                                                                                                                                                                                                                                 |
| Manuscript ID                   | bmjopen-2017-021431.R1                                                                                                                                                                                                                                                                                                                                                                                                                                                                                                                                                                                          |
| Article Type:                   | Research                                                                                                                                                                                                                                                                                                                                                                                                                                                                                                                                                                                                        |
| Date Submitted by the Author:   | 07-Aug-2018                                                                                                                                                                                                                                                                                                                                                                                                                                                                                                                                                                                                     |
| Complete List of Authors:       | MENEZES, MARIA ALEXSANDRA; Universidade Federal de Sergipe, ; Gurgel, Ricardo; Universidade Federal de Sergipe, Postgraduate Programme in Health Science<br>Bittencourt, Sonia; National School of Public Health (ENSP/FIOCRUZ), Department of Epidemiology and Quantitative Methods in Health<br>Pacheco, Vanessa; Escola Nacional de Saude Publica, Postgraduate Programme in Epidemiology and Public Health<br>Cipolotti, Rosana; Federal University of Sergipe, Brazil. , Medicine<br>Leal, Maria do Carmo; Escola Nacional de Saude Publica, Department of Epidemiology and Quantitative Methods in Health |
| <b>Primary Subject Heading</b>: | Evidence based practice                                                                                                                                                                                                                                                                                                                                                                                                                                                                                                                                                                                         |
| Secondary Subject Heading:      | Paediatrics, Public health, Obstetrics and gynaecology, Epidemiology                                                                                                                                                                                                                                                                                                                                                                                                                                                                                                                                            |
| Keywords:                       | NEONATOLOGY, EPIDEMIOLOGY, Quality in health care < HEALTH SERVICES ADMINISTRATION & MANAGEMENT, PUBLIC HEALTH                                                                                                                                                                                                                                                                                                                                                                                                                                                                                                  |
|                                 |                                                                                                                                                                                                                                                                                                                                                                                                                                                                                                                                                                                                                 |

SCHOLARONE™  
Manuscripts

1  
2  
3 HEALTH FACILITY STRUCTURE AND MATERNAL CHARACTERISTICS RELATED  
4 TO ESSENTIAL NEWBORN CARE IN BRAZIL: A CROSS-SECTIONAL STUDY  
5  
6  
7

8 Corresponding author: Maria Alexandra Silva Menezes  
9

10 Postgraduate Programme in Health Science – Sergipe Federal University – Aracaju, Brazil  
11

12 Street Boquim, 477, Centro, Aracaju-SE/Brazil  
13

14 ZIP Code 49010-280  
15

16 [alexandra.mar@hotmail.com](mailto:alexandra.mar@hotmail.com)  
17

18 55 (79) 99142-0305  
19

20 55 (79) 3221-1598  
21

22  
23 Co-authors

24 Ricardo Gurgel - Postgraduate Programme in Health Science – Sergipe Federal University –  
25 Aracaju, Brazil  
26  
27

28 Sonia Duarte Azevedo Bittencourt - Department of Epidemiology and Quantitative Methods in  
29 Health, National School of Public Health (ENSP/FIOCRUZ) – Rio de Janeiro, Brazil  
30

31  
32 Vanessa Eufrazino Pacheco - Postgraduate Programme in Epidemiology and Public Health –  
33 National School of Public Health (ENSP/FIOCRUZ) – Rio de Janeiro, Brazil  
34

35  
36 Rosana Cipolotti - Postgraduate Programme in Health Science – Sergipe Federal University –  
37 Aracaju, Brazil  
38

39  
40 Maria do Carmo Leal - Department of Epidemiology and Quantitative Methods in Health,  
41 National School of Public Health (ENSP/FIOCRUZ) – Rio de Janeiro, Brazil  
42

43  
44  
45 MeSH terms: Maternal-Child Health Services; Process Assessment (Health Care). Hospitals,  
46 Private. Hospitals, Public. Health Care Quality, Access, and Evaluation.  
47  
48  
49

50  
51 Word Count: Abstract 293; 3,604 words (exclude abstract).  
52  
53  
54  
55  
56  
57  
58  
59  
60

1  
2  
3 ABSTRACT  
4  
5

6 OBJECTIVES: To assess the availability of the WHO's Essential Newborn Care (ENC)  
7 program items and to investigate how the non-use of such technologies associates with the  
8 mothers' characteristics and hospital structure.  
9  
10  
11

12 DESIGN: A cross-sectional observational health facility assessment.  
13  
14

15 SETTING: This is a secondary analysis of the "Birth in Brazil" study, a national  
16 population-based survey on postnatal women/newborn babies and of 266 publicly and  
17 privately funded health facilities (secondary and tertiary level of care).  
18  
19  
20  
21

22 PARTICIPANTS: Data on 23,894 postnatal women and their newborn babies were  
23 analyzed.  
24  
25  
26

27 MAIN OUTCOME MEASURES: The facility structure was assessed by evaluating the  
28 availability of medicines and equipment for perinatal care, a paediatrician on call 24/7, a  
29 neonatal intensive care unit (NICU), and kangaroo mother care. The access to each ENC item  
30 was assessed according to the health facility structure and the mothers' socio-demographic  
31 characteristics.  
32  
33  
34  
35  
36  
37

38 RESULTS: The coverage of ENC items is low in Brazil. The factors associated with failure  
39 in pregnant woman reference were: pregnant adolescents ( $OR_{adj}$  1.17; 95%CI 1.06-1.29),  $\leq$  7  
40 years of schooling ( $OR_{adj}$  1.47; 95%CI 1.22-1.78), inadequate antenatal care ( $OR_{adj}$  1.67; 95%CI  
41 1.47-1.89). The non-use of corticosteroids was more frequently associated with the absence of  
42 an NICU ( $OR_{adj}$  3.93; 95%CI 2.34-6.66), inadequate equipment, and medicines ( $OR_{adj}$  2.16 95%CI  
43 1.17-4.01). In caesarean deliveries, there was a less frequent use of a partograph ( $OR_{adj}$  4.93;  
44 95%CI 3.77-6.46), early skin-to-skin contact ( $OR_{adj}$  3.07; 95%CI 3.37-4.90), and breast feeding in  
45 the first hour after birth ( $OR_{adj}$  2.55; 95%CI 2.21-2.96).  
46  
47  
48  
49  
50  
51  
52  
53  
54  
55  
56  
57  
58  
59  
60

1  
2  
3 CONCLUSIONS: The coverage of ENC technologies is low throughout Brazil and shows  
4 regional differences. We found a positive effect of adequate structure at health facilities on  
5 antenatal corticosteroids use and on partograph use during labour. We found a negative effect  
6 of caesarean section on early skin-to-skin contact and early breast feeding.  
7  
8  
9

10  
11  
12  
13  
14 **Keywords:** Essential Newborn Care, Brazil, structure, private health care, public health  
15 care.  
16  
17  
18  
19  
20  
21  
22  
23  
24  
25  
26  
27  
28  
29  
30  
31  
32  
33  
34  
35  
36  
37  
38  
39  
40  
41  
42  
43  
44  
45  
46  
47  
48  
49  
50  
51  
52  
53  
54  
55  
56  
57  
58  
59  
60

1  
2  
3 STRENGTHS AND LIMITATIONS OF THIS STUDY  
4

5 The strength of this study is that we have used a representative nationwide survey, with  
6  
7 primary data collected from medical records. This allowed, for the first time, a description of  
8  
9 the Essential Newborn Care and variables related to hospital structure and characteristics of  
10  
11 the mothers.  
12

13  
14  
15  
16  
17 As limitation, the “Birth in Brazil” study was conducted in hospitals with more than 500  
18  
19 deliveries per year and 80% of childbirths in the country are in these hospitals. Smaller  
20  
21 hospitals are likely to have worse structures, which would result in an underestimation of the  
22  
23 inadequacies of health care.  
24

25  
26  
27  
28  
29 The study data was based on information provided by women early after delivery, medical  
30  
31 records and by managers, rather than on observation of performance of the essential care  
32  
33 items.  
34

35  
36  
37  
38  
39 The cross-sectional nature of these survey data limits our ability to assess causal relationships.  
40  
41  
42  
43  
44  
45  
46  
47  
48  
49  
50  
51  
52  
53  
54  
55  
56  
57  
58  
59  
60

## INTRODUCTION

The reduction of child mortality is a topic of the Sustainable Development Goal 3, i.e., to ensure healthy lives and promote well-being for all at all ages [1]. Neonatal mortality accounts for 45% of all under-five deaths worldwide [2] and reaches 64% in Brazil [3].

Increased coverage and quality improvement of preconception, antenatal, intrapartum, and postnatal interventions can avert 71% of neonatal deaths by 2025. Interventions around the labour period are the most effective in reducing neonatal mortality. The wider use of effective interventions will prevent one million neonatal deaths by 2020 [4].

Almost two decades ago, with a view to reducing neonatal mortality and morbidity, the World Health Organization (WHO) recommended specific care practices outlined in the Essential Newborn Care (ENC) program. These are strategic actions extended from preconception care through to the postnatal period [5]. Infant mortality tends to be lower in countries where the coverage of these essential interventions is high [3].

In Brazil, antenatal care coverage is high (98% of pregnant women had at least one antenatal care visit and 66.9% of them had more than 6 antenatal care visits in 2015) and the hospital delivery rate is almost 100%. Nevertheless, neonatal mortality remains high (9.5 deaths per 1,000 live births in 2015) [6] and deaths in first 24 hours of life account for nearly a quarter of all neonatal deaths [7]. The main reasons are preventable causes, such as complications from preterm birth, sepsis, and intrapartum-related asphyxia [8]. This situation may be linked to economic, social, and biological disparities, but may be also linked to the quality of antenatal care, labour, and birth assistance.

However, only limited national data are available on public policies, such as antenatal corticosteroid use in managing preterm labour, and on the availability of the kangaroo mother care (KMC) for preterm or low birthweight newborns [3]. Thus, identifying shortcomings in

1  
2  
3 perinatal care in Brazil is an essential stage in conducting interventions to allocate resources  
4 according to where they are needed most and where their effect will be maximised. This is a  
5 problem that may also affect other countries with a similar level of socio-economic  
6 development, observable in different places and at different intensities [9].  
7  
8  
9

10  
11 This study aims to evaluate the availability of certain core technologies for the care of  
12 mothers and newborns, as defined in the WHO's Essential Newborn Care program, and the  
13 association between the non-use of these technologies and variables related to hospital  
14 structure and the mothers' characteristics.  
15  
16  
17  
18  
19  
20  
21  
22

## 23 METHODS

### 24 **Design and Setting.**

25  
26 This is a cross-sectional observational health facility assessment.  
27  
28

29  
30 This study is a secondary analysis of the "Birth in Brazil" study [10], a national  
31 population-based survey conducted between February 2011 and October 2012, including data  
32 on the mothers' pregnancy and delivery, their newborn babies, and the structure of the health  
33 facilities where the deliveries occurred.  
34  
35  
36  
37  
38  
39  
40

### 41 **Participants and Sample.**

42  
43 For the "Birth in Brazil" study, we included 90 women who recently delivered (within  
44 the last 24 hours) from every health facility. The sample was selected using three-stage cluster  
45 sampling. The first encompassed hospitals with 500 or more deliveries per year, stratified  
46 according to Brazil's five geographical macro-regions (North, Northeast, Southeast, South and  
47 Mid-West), location (state capital or not), and type of funding (public and private). In the  
48 second stage of sampling, an inverse sampling method was used to select as many days as  
49 were necessary to interview 90 postnatal women in the hospital. This method, originally  
50  
51  
52  
53  
54  
55  
56  
57  
58  
59  
60



1  
2  
3 proposed by Haldane [11] to estimate frequencies and proportions, can be defined as a  
4  
5 technique to sample as many units (in this case, days) as are needed to observe a pre-specified  
6  
7 number of successes or, in this case, 90 interviews performed with postnatal women in the  
8  
9 hospital. To account for the difference in the number of live births on weekends and on work  
10  
11 days, a minimum of seven consecutive days was mandatory and the size of the field team was  
12  
13 determined to ensure compliance with this rule [12].  
14  
15

16 The number of postnatal women (third stage of the sample) to be selected per day and  
17  
18 for every hospital depended on the number of live births, the number of interview shifts, and  
19  
20 the number of available interviewers per day in the hospital. To ensure a random selection of  
21  
22 postnatal women, the survey central office prepared tables containing an ordered list of  
23  
24 women to be interviewed according to the number of live births. The ordering of this list was  
25  
26 defined by the order of the women's admittance to the hospital. Some additional women were  
27  
28 selected to replace those who did not respond [12].  
29  
30

### 31 **Data collection**

32  
33  
34 Data was obtained from two sources: i) interviews were conducted with health facility  
35  
36 managers and with postnatal women during hospitalisation within the first 24 hours after  
37  
38 birth; ii) the medical records of mothers and newborns were consulted after hospital discharge  
39  
40 or death. In the case of prolonged postpartum hospital stays, records were analyzed up to the  
41  
42 42nd day of hospitalisation for mothers and up to the 28th day for newborns. In the case of  
43  
44 postnatal transfers of mothers and/or newborns, data was obtained from the hospital records  
45  
46 of the transfer destination, even when the hospital was not part of the original sample of the  
47  
48 study. In the case of refusal or early discharge, the participant was replaced by a new subject  
49  
50 selected from the same hospital. A digital photograph of the antenatal notes was taken when  
51  
52 available and the relevant data from the notes was converted into electronic form. All field  
53  
54 work was conducted by healthcare professionals or healthcare students under the supervision  
55  
56  
57  
58  
59  
60

1  
2  
3 of the research team. Further information about the sample design and data collection are  
4  
5 detailed elsewhere [10][13].  
6  
7  
8  
9

### 10 **Variable definitions**

11  
12  
13 Following WHO guidelines [5], six essential neonatal care variables were investigated:  
14  
15 adequate referral of pregnant woman during the antenatal period to a specific health facility  
16  
17 for delivery; administration of antenatal corticosteroids when indicated [14] to women at risk  
18  
19 of preterm birth between 24 and 34 weeks' gestation (gestational age was calculated using an  
20  
21 algorithm that primarily relied upon early ultrasound estimates)[15]; continuous social support  
22  
23 (a companion at all times during the mother's hospital stay); use of a partograph during  
24  
25 labour; early skin-to-skin contact between mother and newborn, whilst still in the delivery  
26  
27 room; and breast feeding in the first hour after birth.  
28  
29

30  
31 At the hospitals, the following structure-related variables were investigated: existence  
32  
33 of a neonatal intensive care unit (NICU) and use of the KMC, a paediatrician on call 24 hours a  
34  
35 day, availability of equipment for the emergency care of mothers (laryngoscope and  
36  
37 endotracheal tube, self-inflating bag valve mask, and mechanical ventilator) and newborns  
38  
39 (laryngoscope and endotracheal tube, self-inflating bag valve mask, suction device, adapter for  
40  
41 meconium aspirator, mechanical ventilator and warming device), availability of medicines for  
42  
43 mothers and newborns (antihypertensives, anxiolytics/hypnotics, corticosteroids, oxytocics,  
44  
45 inhibitors of uterine contractility, coagulants/haemostatics, magnesium sulphate, surfactant,  
46  
47 eye drops for prophylaxis of gonococcal ophthalmia, and anti-D immunoglobulin for Rh-  
48  
49 negative women) as required by Brazilian law [16]. For the set of equipment and medicines, a  
50  
51 degree of adequacy was calculated by taking affirmative responses as a percentage of the total  
52  
53 items investigated. Health facilities were classified as adequate if 80% or more of the items  
54  
55  
56  
57  
58  
59  
60

1  
2  
3 were available and inadequate if less than 80% were available. Equal weights were attributed  
4  
5 to all items studied.

### 6 7 **Analytical approach**

8  
9  
10 The study variables were compared according to the type of funding (public or  
11 private), macro-region (North, Northeast, Southeast, South and Mid-West), location (state  
12 capital or not), as well as by the mothers' characteristics, such as age (12 to 19, 20 to 34 and 35  
13 or more years old), schooling (7 or less, 8 to 10, 11 to 14 and 15 or more years in school), social  
14 class (A or B, C, D or E), sufficient number of antenatal care visits (4 or more visits = adequate;  
15 fewer than 4 = inadequate), and delivery route (vaginal or caesarean section). Women who  
16 gave birth in public or mixed health care facilities and who were not covered by private health  
17 insurance plans were classified as receiving public health care at childbirth. Women covered by  
18 a private health insurance plan and women who gave birth in private hospitals, regardless of  
19 coverage by a health insurance plan, were classified as receiving private health care at  
20 childbirth. Mixed health care facility is a care in private hospitals that was paid by government  
21 unified health care system.  
22  
23  
24  
25  
26  
27  
28  
29  
30  
31  
32  
33  
34  
35

36 In Brazil, the organisation responsible for the demographic census (IBGE) uses a  
37 particular indicator, which is a proxy wealth index. This index considers the schooling of the  
38 interviewee and the access to some specific public services and goods that the interviewee  
39 possesses at the time of the interview. The individual is classified according to socio-economic  
40 criteria into the following classes: A – more than 45 points; B1 – from 38 to 44 points; B2 –  
41 from 29 to 37 points; C1 – from 23 to 28 points; C2 – from 17 to 27 points; D-E – from 0 to 16  
42 points. For this work, classes A, B1 and B2 were grouped as class A and B, and classes C1 and  
43 C2 were grouped as class C. Classes D and E remained as in the original [17].  
44  
45  
46  
47  
48  
49  
50  
51  
52

53 For each ENC-related variable, the percentage use was calculated (mean, 95%  
54 Confidence Interval-CI) according to variables relating to the health facility structure and the  
55  
56  
57  
58  
59

1  
2  
3 mothers' socio-demographic characteristics. Simple regression models were used to estimate  
4  
5 the associations between the dependent variable (non-access to each item of essential  
6  
7 newborn care) and the independent variables listed above. Crude odds ratios with respective  
8  
9 95% CI were then estimated. In sequence, by the backward method, multiple regression  
10  
11 models were developed with each dependent variable and the independent variables that  
12  
13 proved significant in the first analysis. Independent variables that proved significant (to a 5%  
14  
15 level of significance) in explaining the use or the non-use of each of the essential care items  
16  
17 were retained in the model. The odds ratios were adjusted, and the 95% CI were estimated. All  
18  
19 inferential analyses were weighted and took the sampling design plan into account, which  
20  
21 considers the stratification, the conglomerate, and the probability of the individuals. The  
22  
23 results were obtained using IBM® SPSS (Statistical Package for the Social Sciences, for  
24  
25 Windows, version 22).  
26  
27

28  
29 The ethics committee of the Sergio Arouca National School of Public Health, Oswaldo  
30  
31 Cruz Foundation (CEP/ENSP), approved this study under the research protocol  
32  
33 CAAE:0096.0.031.000-10. All hospital directors and postnatal women gave written informed  
34  
35 consent.  
36  
37

### 38 **Patient involvement**

39  
40  
41 No patients were involved in defining the research question or the outcome measures,  
42  
43 nor were they involved in the design and implementation of the study. There are no plans to  
44  
45 involve patients in the dissemination of the results.  
46  
47  
48  
49  
50

## 51 **RESULTS**

52  
53  
54 The coverage of the ENC items investigated according to location, type of funding,  
55  
56 health facility structural variables, and the mothers' characteristics is shown in Table 1. In  
57  
58  
59

1  
2  
3 Brazil, pregnant women were referred to a specific health facility during the antenatal period  
4  
5 in 58.7% (95% CI 56.7%-60.7%) of cases. According to the type of funding, this was higher in  
6  
7 privately funded and for women with adequate antenatal care. Antenatal corticosteroids were  
8  
9 used in 41.0% (95% CI 34.2%-48.0%) of pregnant women; it was less frequently used in publicly  
10  
11 funded facilities, in the North and Mid-West regions, in facilities without paediatrician  
12  
13 available 24 hours a day, with material resources less than 80% and without a NICU.  
14  
15 Partograph labour monitoring occurred in 48.5% (95% CI 43.8%-53.1%) of the deliveries  
16  
17 around the country, with a distribution similar to antenatal corticosteroid use. Continuous  
18  
19 social support during the hospital stay was provided to 19.9% (95% CI 17.0%-23.1%) of the  
20  
21 entire sample; it was higher in cases where the mother had 15 or more years of schooling, in  
22  
23 facilities with a NICU, with material resources greater than 80%, and with paediatrician  
24  
25 available 24 hours a day. Early skin-to-skin contact occurred in 26.3% (95% CI 23.9.0%-29.0%)  
26  
27 of cases and only in 13.9% (95% CI 12.0%-16.2%) of women undergoing caesarean section. The  
28  
29 rate of breast feeding in the first hour after birth was 59.1% (95% CI 56.3-61.9); this was lower  
30  
31 in privately funded facilities, for older women, for women with higher schooling and income,  
32  
33 and for women delivering by caesarean section.  
34  
35

36  
37 The simple regression analysis (Tables 2 and 3) found health facilities with inadequate  
38  
39 material resources (OR 3.46; IC95% 1.76-6.82) and absence of NICU beds (OR 5.0; IC95% 2.97-  
40  
41 8.43) as risk factors to the not use of antenatal corticosteroids. Pregnant women in lower  
42  
43 social classes were more likely to not have continuous social support (social classes D+ E: OR  
44  
45 4.0; IC 95% 2.96-5.41).  
46  
47

48 The adjusted logistic regression analysis (Table 4) showed that privately funded  
49  
50 women were more likely to not use a partograph (OR<sub>adj</sub> 3.36; IC95% 1.75-6.49) and to not  
51  
52 breast feed in the first hour after birth (OR<sub>adj</sub> 1.87; IC 95% 1.28-2.74). The use of a partograph  
53  
54  
55  
56  
57  
58  
59  
60

1  
2  
3 varies according to the region of residence; it is lower in the North ( $OR_{adj}$  6.94; IC95% 2.89-  
4 16.82), Northeast ( $OR_{adj}$ : 3.58; IC95% 2.15-5.95) and Mid-West ( $OR_{adj}$ : 2.82; IC95% 1.52-5.22).  
5  
6

7 Lower social class was related to lower continuous social support (social class C:  $OR_{adj}$   
8 1.40; IC95% 1.19-1.65; social class D and E:  $OR_{adj}$ : 1.77; IC95% 1.28-2.44).  
9  
10

11 Caesarean section was associated with an absence of early skin-to-skin contact ( $OR_{adj}$   
12 3.07; IC95% 3.37-4.90) and breast feeding in first hour after birth ( $OR_{adj}$  2.55; IC95% 2.21-2.96),  
13  
14  
15  
16 regardless of the maternal characteristics and the hospital structure.  
17  
18  
19  
20  
21  
22  
23  
24  
25  
26  
27  
28  
29  
30  
31  
32  
33  
34  
35  
36  
37  
38  
39  
40  
41  
42  
43  
44  
45  
46  
47  
48  
49  
50  
51  
52  
53  
54  
55  
56  
57  
58  
59  
60

**Table 1 – Number and percentage (confidence interval) of Essential Newborn Care items according to geographical location, mothers’ socio-economic variables, type of funding and structural variables (Brazil, 2011-2012)**

| Variables                        | Reference to health facility (n=23.851) |      |           | Antenatal corticosteroids used appropriately (n=1.126) |      |           | Partograph used (n=13.458) |      |           | Continuous social support (n=23.879) |      |           | Early skin-to-skin contact (n=23.894) |      |           | Breastfeeding in first hour of birth (n=22.919) |      |           |
|----------------------------------|-----------------------------------------|------|-----------|--------------------------------------------------------|------|-----------|----------------------------|------|-----------|--------------------------------------|------|-----------|---------------------------------------|------|-----------|-------------------------------------------------|------|-----------|
|                                  | N                                       | %    | 95%CI     | N                                                      | %    | 95%CI     | n                          | %    | 95%CI     | n                                    | %    | 95%CI     | N                                     | %    | 95%CI     | n                                               | %    | 95%CI     |
| <b>Total</b>                     | 14,004                                  | 58.7 | 56.7-60.7 | 458                                                    | 41.0 | 34.2-48.0 | 6,524                      | 48.5 | 43.8-53.1 | 4,756                                | 19.9 | 17.0-23.1 | 6,293                                 | 26.3 | 23.9-29.0 | 12,374                                          | 59.1 | 56.3-61.9 |
| <b>Macro-region</b>              |                                         |      |           |                                                        |      |           |                            |      |           |                                      |      |           |                                       |      |           |                                                 |      |           |
| North                            | 1,132                                   | 49.4 | 43.7-55.2 | 34                                                     | 24.2 | 13.3-40.1 | 325                        | 22.4 | 11.8-38.3 | 277                                  | 12.1 | 7.5-18.9  | 589                                   | 25.7 | 19.1-33.5 | 1,511                                           | 73.4 | 69.0-77.4 |
| Northeast                        | 3,770                                   | 54.7 | 51.4-58.0 | 160                                                    | 42.4 | 28.4-57.8 | 1,359                      | 33.1 | 24.7-42.7 | 1,017                                | 14.7 | 10.5-20.3 | 1,857                                 | 26.9 | 22.3-32.0 | 3,353                                           | 57.1 | 52.8-61.4 |
| Southeast                        | 6,271                                   | 61.8 | 58.7-64.9 | 196                                                    | 47.6 | 36.4-59.0 | 3,631                      | 65.8 | 59.3-71.8 | 2,517                                | 24.8 | 19.6-30.8 | 2,561                                 | 25.2 | 21.2-29.7 | 4,868                                           | 54.6 | 49.2-59.9 |
| South                            | 1,906                                   | 64.0 | 56.3-71.0 | 55                                                     | 47.8 | 39.8-55.9 | 880                        | 55.1 | 44.9-64.8 | 684                                  | 22.9 | 16.8-30.5 | 910                                   | 30.5 | 24.7-36.9 | 1,719                                           | 64.1 | 56.0-71.4 |
| Mid-West                         | 925                                     | 59.7 | 53.0-66.1 | 13                                                     | 20.0 | 12.0-31.4 | 329                        | 42.0 | 28.4-57.0 | 261                                  | 16.8 | 11.1-24.7 | 376                                   | 24.2 | 16.8-33.5 | 923                                             | 65.6 | 59.9-70.8 |
| <b>Location</b>                  |                                         |      |           |                                                        |      |           |                            |      |           |                                      |      |           |                                       |      |           |                                                 |      |           |
| Non-capital                      | 8,661                                   | 57.9 | 55.3-60.6 | 190                                                    | 36.5 | 30.1-43.3 | 3,514                      | 42.5 | 37.5-47.6 | 2,290                                | 15.3 | 12.5-18.6 | 3,388                                 | 22.6 | 20.1-25.4 | 7,795                                           | 58.9 | 55.1-62.6 |
| Capital                          | 5,342                                   | 60.0 | 57.0-62.9 | 268                                                    | 45.6 | 34.3-57.3 | 3,010                      | 58.1 | 49.6-66.1 | 2,466                                | 27.7 | 22.0-34.1 | 2,905                                 | 32.6 | 27.6-37.9 | 4,579                                           | 59.5 | 55.4-63.4 |
| <b>Funding</b>                   |                                         |      |           |                                                        |      |           |                            |      |           |                                      |      |           |                                       |      |           |                                                 |      |           |
| Public                           | 11,501                                  | 56.6 | 54.5-58.7 | 385                                                    | 38.8 | 31.3-46.8 | 6,375                      | 49.3 | 44.5-54.2 | 3,391                                | 16.7 | 13.7-20.2 | 5,431                                 | 26.7 | 23.9-29.6 | 11,268                                          | 63.4 | 60.4-66.4 |
| Private                          | 2,502                                   | 70.8 | 65.5-75.5 | 73                                                     | 63.1 | 52.4-72.7 | 149                        | 27.6 | 17.7-40.4 | 1,365                                | 38.7 | 30.0-48.0 | 862                                   | 24.3 | 19.3-30.2 | 1,106                                           | 34.9 | 27.8-42.7 |
| <b>Mother’s age (years)</b>      |                                         |      |           |                                                        |      |           |                            |      |           |                                      |      |           |                                       |      |           |                                                 |      |           |
| 12 to 19                         | 2,385                                   | 52.3 | 49.5-55.1 | 88                                                     | 31.8 | 22.5-42.9 | 1,656                      | 49.5 | 44.0-54.9 | 813                                  | 17.8 | 14.7-21.3 | 1,212                                 | 26.5 | 23.4-29.9 | 2,593                                           | 59.8 | 56.5-63.0 |
| 20 to 34                         | 10,065                                  | 60.0 | 57.9-62.0 | 301                                                    | 42.8 | 35.9-50.0 | 4,417                      | 48.6 | 44.1-53.3 | 3,315                                | 19.7 | 16.8-23.1 | 4,434                                 | 26.4 | 23.9-29.1 | 8,739                                           | 54.0 | 51.1-57.0 |
| 35 or more                       | 1,549                                   | 61.9 | 58.6-65.1 | 73                                                     | 50.7 | 40.4-60.8 | 448                        | 43.6 | 37.9-49.5 | 624                                  | 24.9 | 20.9-29.3 | 645                                   | 25.7 | 22.6-29.1 | 1,042                                           | 43.4 | 39.5-47.4 |
| <b>Mother’s years’ schooling</b> |                                         |      |           |                                                        |      |           |                            |      |           |                                      |      |           |                                       |      |           |                                                 |      |           |
| ≤ 7                              | 3,285                                   | 52.1 | 49.3-54.9 | 135                                                    | 37.9 | 28.2-48.6 | 1,939                      | 43.2 | 37.9-48.6 | 868                                  | 13.7 | 11.2-16.7 | 1,826                                 | 28.9 | 25.6-32.4 | 3,552                                           | 60.0 | 56.9-63.1 |
| 8 to 10                          | 3,421                                   | 56.3 | 53.4-59.1 | 91                                                     | 33.7 | 25.1-43.6 | 2,047                      | 52.0 | 47.0-57.0 | 1,016                                | 16.7 | 13.3-20.7 | 1,614                                 | 26.5 | 23.4-29.9 | 3,464                                           | 59.3 | 56.0-62.5 |
| 11 to 14                         | 5,751                                   | 62.2 | 59.8-64.5 | 190                                                    | 45.9 | 37.6-54.5 | 2,355                      | 51.8 | 46.3-57.2 | 1,993                                | 21.5 | 18.0-25.5 | 2,261                                 | 24.4 | 22.1-26.9 | 4,525                                           | 50.4 | 46.9-53.8 |
| 15 or more                       | 1,490                                   | 70.8 | 66.7-74.6 | 44                                                     | 53.1 | 40.0-65.7 | 167                        | 38.7 | 31.7-46.1 | 848                                  | 40.3 | 34.2-46.8 | 565                                   | 26.8 | 21.1-33.4 | 774                                             | 37.4 | 33.1-41.8 |

**Social class**

|     |       |      |           |     |      |           |       |      |           |       |      |           |       |      |           |       |      |           |
|-----|-------|------|-----------|-----|------|-----------|-------|------|-----------|-------|------|-----------|-------|------|-----------|-------|------|-----------|
| D+E | 2,898 | 51.8 | 48.7-54.8 | 107 | 34.3 | 22.5-48.4 | 1,572 | 38.5 | 32.6-44.8 | 598   | 10.7 | 8.5-13.3  | 1,520 | 27.1 | 23.7-30.8 | 3,253 | 67.7 | 64.5-70.8 |
| C   | 7,184 | 58.4 | 55.9-60.8 | 239 | 42.3 | 34.7-50.3 | 3,816 | 52.7 | 48.1-57.3 | 2,244 | 18.2 | 15.0-22.0 | 3,252 | 26.4 | 23.6-29.4 | 6,479 | 60.0 | 56.8-63.1 |
| A+B | 3,804 | 66.2 | 62.9-69.4 | 108 | 45.6 | 36.0-55.4 | 1,094 | 54.0 | 48.8-59.2 | 1,860 | 32.3 | 27.8-37.2 | 1,452 | 25.2 | 21.9-28.9 | 2,529 | 49.1 | 45.0-53.2 |

**Antenatal care**

|            |        |      |           |     |      |           |       |      |           |       |      |           |       |      |           |       |      |           |
|------------|--------|------|-----------|-----|------|-----------|-------|------|-----------|-------|------|-----------|-------|------|-----------|-------|------|-----------|
| Inadequate | 1,876  | 45.5 | 42.4-48.7 | 165 | 35.1 | 26.2-45.3 | 1,261 | 42.8 | 36.9-49.1 | 538   | 13.0 | 10.7-15.8 | 1,119 | 27.1 | 23.5-31.0 | 2,257 | 57.7 | 53.6-61.6 |
| Adequate   | 11,849 | 61.5 | 59.4-63.6 | 283 | 44.9 | 37.6-52.3 | 5,148 | 50.2 | 45.7-54.8 | 4,141 | 21.5 | 18.3-25.0 | 5,067 | 26.3 | 23.8-28.9 | 9,874 | 53.2 | 50.2-56.1 |

**Type of delivery**

|                 |       |      |           |     |      |           |       |      |           |       |      |           |       |      |           |       |      |           |
|-----------------|-------|------|-----------|-----|------|-----------|-------|------|-----------|-------|------|-----------|-------|------|-----------|-------|------|-----------|
| Vaginal/forceps | 6,215 | 54.1 | 51.7-56.5 | 158 | 30.4 | 23.6-38.2 | 6,142 | 53.4 | 48.4-58.4 | 2,382 | 20.7 | 16.8-25.3 | 4,564 | 39.7 | 36.1-43.4 | 7,478 | 67.6 | 64.6-70.5 |
| Caesarean       | 7,788 | 63.0 | 60.7-65.1 | 303 | 50.0 | 41.4-58.5 | 382   | 19.5 | 16.0-23.5 | 2,374 | 19.2 | 16.3-22.4 | 1,729 | 13.9 | 12.0-16.2 | 4,896 | 41.3 | 38.0-44.6 |

**Material resources > 80%**

|     |        |      |           |     |      |           |       |      |           |       |      |           |       |      |           |        |      |           |
|-----|--------|------|-----------|-----|------|-----------|-------|------|-----------|-------|------|-----------|-------|------|-----------|--------|------|-----------|
| No  | 920    | 56.2 | 48.7-63.4 | 8   | 17.3 | 10.1-28.0 | 173   | 17.3 | 7.4-35.2  | 88    | 5.4  | 3.5-8.1   | 331   | 20.2 | 11.8-32.5 | 890    | 56.8 | 43.1-69.5 |
| Yes | 13,083 | 58.9 | 56.8-61.0 | 453 | 42.0 | 35.1-49.3 | 6,351 | 51.0 | 46.2-55.8 | 4,668 | 21.0 | 17.9-24.4 | 5,962 | 26.8 | 24.2-29.5 | 11,484 | 53.8 | 50.8-56.7 |

**Paediatrician on call 24/7**

|     |        |      |           |     |      |           |       |      |           |       |      |           |       |      |           |       |      |           |
|-----|--------|------|-----------|-----|------|-----------|-------|------|-----------|-------|------|-----------|-------|------|-----------|-------|------|-----------|
| No  | 3,737  | 58.9 | 55.0-62.8 | 64  | 27.9 | 20.1-37.4 | 1,252 | 35.3 | 26.9-44.7 | 895   | 14.1 | 10.6-18.5 | 1,733 | 27.3 | 23.1-31.9 | 3,603 | 58.8 | 53.3-64.1 |
| Yes | 10,266 | 58.6 | 56.2-61.1 | 398 | 44.3 | 36.2-52.7 | 5,272 | 53.2 | 47.6-58.7 | 3,861 | 22.0 | 18.4-26.1 | 4,560 | 26.0 | 23.0-29.2 | 8,771 | 52.2 | 48.7-55.8 |

**Neonatal ICU**

|     |       |      |           |     |      |           |       |      |           |       |      |           |       |      |           |       |      |           |
|-----|-------|------|-----------|-----|------|-----------|-------|------|-----------|-------|------|-----------|-------|------|-----------|-------|------|-----------|
| No  | 5,015 | 56.7 | 52.8-60.5 | 29  | 14.8 | 10.2-20.8 | 1,284 | 33.3 | 26.5-40.9 | 1,135 | 12.9 | 9.4-17.1  | 2,038 | 23.0 | 19.4-27.0 | 4,997 | 58.9 | 53.9-63.7 |
| Yes | 8,987 | 59.9 | 57.5-62.2 | 433 | 46.4 | 38.7-54.4 | 4,699 | 58.9 | 52.7-64.9 | 3,621 | 24.1 | 20.1-28.7 | 4,255 | 28.3 | 25.0-31.9 | 7,377 | 51.1 | 47.4-54.8 |

**Kangaroo mother care**

|     |       |      |           |     |      |           |       |      |           |       |      |           |       |      |           |       |      |           |
|-----|-------|------|-----------|-----|------|-----------|-------|------|-----------|-------|------|-----------|-------|------|-----------|-------|------|-----------|
| No  | 9,739 | 58.3 | 55.8-60.8 | 203 | 33.8 | 28.1-40.0 | 3,785 | 41.9 | 36.5-47.6 | 3,051 | 18.3 | 15.6-21.3 | 3,991 | 23.9 | 21.2-26.8 | 8,447 | 52.8 | 49.3-56.3 |
| Yes | 4,263 | 59.5 | 55.8-63.2 | 259 | 49.1 | 36.9-61.5 | 2,739 | 61.8 | 52.5-70.3 | 1,705 | 23.8 | 17.5-31.5 | 2,302 | 32.1 | 27.3-37.2 | 3,927 | 56.8 | 51.1-62.3 |



**Table 2 – Simple odds ratios (confidence interval) for non-use of Essential Newborn Care items, according to geographical location, type of funding and structural variables (Brazil, 2011-2012)**

|                                    | No reference to health facility | Antenatal Corticosteroids not used | Partograph not used | No continuous social support | No early skin-to-skin contact | No breast feeding in first hour of birth |
|------------------------------------|---------------------------------|------------------------------------|---------------------|------------------------------|-------------------------------|------------------------------------------|
|                                    | Simple OR (95%CI)               | Simple OR (95%CI)                  | Simple OR (95%CI)   | Simple OR (95%CI)            | Simple OR (95%CI)             | Simple OR (95%CI)                        |
| <b>Macro-region</b>                |                                 |                                    |                     |                              |                               |                                          |
| North                              | 1.65 [1.27,2.16]                | 2.85 [1.21,6.72]                   | 6.66 [2.95,15.02]   | 2.40 [1.30,4.41]             | 0.98 [0.63,1.52]              | 0.44 [0.32,0.59]                         |
| Northeast                          | 1.34 [1.11,1.61]                | 1.23 [0.57,2.63]                   | 3.90 [2.38,6.40]    | 1.91 [1.17,3.11]             | 0.92 [0.66,1.28]              | 0.90 [0.68,1.19]                         |
| South                              | 0.91 [0.64,1.29]                | 0.97 [0.56,1.68]                   | 1.57 [0.97,2.54]    | 1.11 [0.68,1.80]             | 0.77 [0.53,1.11]              | 0.67 [0.45,1.01]                         |
| Mid-West                           | 1.09 [0.81,1.47]                | 3.63 [1.75,7.52]                   | 2.65 [1.35,5.21]    | 1.63 [0.92,2.90]             | 1.06 [0.63,1.76]              | 0.63 [0.46,0.88]                         |
| Southeast                          | 1 (-)                           | 1 (-)                              | 1 (-)               | 1 (-)                        | 1 (-)                         | 1 (-)                                    |
| <b>Location</b>                    |                                 |                                    |                     |                              |                               |                                          |
| Not capital                        | 1.09 [0.92,1.28]                | 1.45 [0.84,2.49]                   | 1.88 [1.26,2.79]    | 2.12 [1.45,3.10]             | 1.65 [.25,2.18]               | 1.02 [0.82,1.28]                         |
| Capital                            | 1 (-)                           | 1 (-)                              | 1 (-)               | 1 (-)                        | 1 (-)                         | 1 (-)                                    |
| <b>Type of funding</b>             |                                 |                                    |                     |                              |                               |                                          |
| Private                            | 0.54 [0.42,0.70]                | 0.38 [0.22,0.65]                   | 2.55 [1.39,4.68]    | 0.32 [0.20,0.50]             | 1.13 [0.81,1.57]              | 3.24 [2.28,4.60]                         |
| Public                             | 1 (-)                           | 1 (-)                              | 1 (-)               | 1 (-)                        | 1 (-)                         | 1 (-)                                    |
| <b>Material resources &gt; 80%</b> |                                 |                                    |                     |                              |                               |                                          |
| Inadequate                         | 1.12 [0.81,1.54]                | 3.46 [1.76,6.82]                   | 4.99 [1.85,13.45]   | 4.69 [2.87,7.67]             | 1.44 [0.75,2.79]              | 0.93 [0.52,1.66]                         |
| Adequate                           | 1 (-)                           | 1 (-)                              | 1 (-)               | 1 (-)                        | 1 (-)                         | 1 (-)                                    |
| <b>Paediatrician on call 24/7</b>  |                                 |                                    |                     |                              |                               |                                          |
| No                                 | 0.99 [0.81,1.21]                | 2.06 [1.16,3.64]                   | 2.09 [1.31,3.32]    | 1.72 [1.16,2.56]             | 0.94 [0.71,1.24]              | 0.81 [0.60,1.09]                         |
| Yes                                | 1 (-)                           | 1 (-)                              | 1 (-)               | 1 (-)                        | 1 (-)                         | 1 (-)                                    |
| <b>Kangaroo mother care</b>        |                                 |                                    |                     |                              |                               |                                          |
| No                                 | 1.05 [0.86,1.28]                | 1.89 [1.08,3.32]                   | 2.24 [1.39,3.59]    | 1.40 [0.92,2.12]             | 1.51 [1.15,1.97]              | 1.35 [0.99,1.83]                         |
| Yes                                | 1 (-)                           | 1 (-)                              | 1 (-)               | 1 (-)                        | 1 (-)                         | 1 (-)                                    |
| <b>Neonatal ICU beds</b>           |                                 |                                    |                     |                              |                               |                                          |
| No                                 | 1.14 [0.94,1.38]                | 5.00 [2.97,8.43]                   | 2.88 [1.88,4.41]    | 2.17 [1.43,3.27]             | 1.32 [1.01,1.74]              | 0.82 [0.62,1.08]                         |
| Yes                                | 1 (-)                           | 1 (-)                              | 1 (-)               | 1 (-)                        | 1 (-)                         | 1 (-)                                    |

**Table 3 – Simple odds ratios (confidence interval) of non-use of Essential Newborn Care items, according to the mothers' socio-economic variables (Brazil, 2011-2012)**

|                                  | No reference to health facility | Antenatal Corticosteroids not used | Partograph not used | No continuous social support | No early skin-to-skin contact | No breastfeeding in first hour of birth |
|----------------------------------|---------------------------------|------------------------------------|---------------------|------------------------------|-------------------------------|-----------------------------------------|
|                                  | Simple OR (95%CI)               | Simple OR (95%CI)                  | Simple OR (95%CI)   | Simple OR (95%CI)            | Simple OR (95%CI)             | Simple OR (95%CI)                       |
| <b>Mother's age (years)</b>      |                                 |                                    |                     |                              |                               |                                         |
| 12 to 19                         | 1.37 (1.23-1.52)                | 1.60 (1.08-2.38)                   | 0.97 (0.86-1.09)    | 1.14 (0.96-1.34)             | 0.99 (0.89-1.11)              | 0.76 (0.68-0.86)                        |
| 20 to 34                         | 1 (-)                           | 1 (-)                              | 1 (-)               | 1 (-)                        | 1 (-)                         | 1 (-)                                   |
| 35 or more                       | 0.92 (0.82-1.04)                | 0.73 (0.50-1.05)                   | 1.23 (1.03-1.45)    | 0.74 (0.65-0.85)             | 1.04 (0.91-1.18)              | 1.45 (1.28-1.64)                        |
| <b>Mother's years' schooling</b> |                                 |                                    |                     |                              |                               |                                         |
| ≤ 7                              | 2.23 (1.81-2.75)                | 1.85 (0.99-3.48)                   | 0.83 (0.60-1.16)    | 4.24 (3.05-5.89)             | 0.90 (0.64-1.27)              | 0.34 (0.27-0.42)                        |
| 8 to 10                          | 1.89 (1.53-2.32)                | 2.22 (1.14-4.31)                   | 0.58 (0.41-0.81)    | 3.37 (2.40-4.73)             | 1.01 (0.73-1.42)              | 0.38 (0.30-0.47)                        |
| 11 to 14                         | 1.48 (1.23-1.77)                | 1.33 (0.71-2.48)                   | 0.59 (0.42-0.81)    | 2.46 (1.88-3.24)             | 1.13 (0.84-1.54)              | 0.54 (0.46-0.65)                        |
| 15 or more                       | 1 (-)                           | 1 (-)                              | 1 (-)               | 1 (-)                        | 1 (-)                         | 1 (-)                                   |
| <b>Social Class</b>              |                                 |                                    |                     |                              |                               |                                         |
| A + B                            | 1 (-)                           | 1 (-)                              | 1 (-)               | 1 (-)                        | 1 (-)                         | 1 (-)                                   |
| C                                | 1.40 (1.22-1.60)                | 1.14 (0.73-1.78)                   | 1.06 (0.89-1.25)    | 2.15 (1.78-2.58)             | 0.94 (0.78-1.13)              | 0.64 (0.55-0.74)                        |
| D + E                            | 1.82 (1.48-2.24)                | 1.60 (0.84-3.06)                   | 1.88 (1.46-2.42)    | 4.00(2.96-5.41)              | 0.91 (0.73-1.14)              | 0.46 (0.38-0.55)                        |
| <b>Antenatal care</b>            |                                 |                                    |                     |                              |                               |                                         |
| Inadequate                       | 1.91 (1.68-2.18)                | 1.50 (1.00-2.26)                   | 1.34 (1.13-1.60)    | 1.83 (1.51-2.21)             | 0.96 (0.82-1.13)              | 0.68 (0.59-0.78)                        |
| Adequate                         | 1 (-)                           | 1 (-)                              | 1                   | 1 (-)                        | 1 (-)                         | 1 (-)                                   |
| <b>Type of delivery</b>          |                                 |                                    |                     |                              |                               |                                         |
| Caesarean                        | 0.69 (0.63-0.77)                | 0.44 (0.29-0.65)                   | 4.74 (3.59-6.25)    | 1.10 (0.85-1.42)             | 4.06 (3.38-4.88)              | 3.04 (2.62-3.53)                        |
| Vaginal                          | 1 (-)                           | 1 (-)                              | 1 (-)               | 1 (-)                        | 1 (-)                         | 1 (-)                                   |

**Table 4 – Adjusted odds ratios (confidence interval) for non-use of Essential Newborn Care items, according to geographical location, type of funding, structural variables and mothers' socio-economic variables (Brazil, 2011-2012)**

|                                  | No reference to health facility | Antenatal Corticosteroids not used | Partograph not used | No continuous social support | No early skin-to-skin contact | No breast feeding in first hour of birth |
|----------------------------------|---------------------------------|------------------------------------|---------------------|------------------------------|-------------------------------|------------------------------------------|
|                                  | Adjusted OR (95%CI)             | Adjusted OR (95%CI)                | Adjusted OR (95%CI) | Adjusted OR (95%CI)          | Adjusted OR (95%CI)           | Adjusted OR (95%CI)                      |
| <b>Macro-region</b>              |                                 |                                    |                     |                              |                               |                                          |
| North                            | X                               | x                                  | 6.94 (2.89-16.82)   | 2.01 (1.06-3.8)              | X                             | 0.48 (0.35-0.65)                         |
| Northeast                        | X                               | x                                  | 3.58 (2.15-5.95)    | 1.81 (1.08-3.03)             | X                             | 0.92 (0.69-1.23)                         |
| South                            | X                               | x                                  | 1.42 (0.83-2.45)    | 1.11 (0.66-1.86)             | X                             | 0.64 (0.42-0.97)                         |
| Mid-West                         | X                               | x                                  | 2.82 (1.52-5.22)    | 2.25 (1.2-4.24)              | X                             | 0.56 (0.37-0.84)                         |
| Southeast                        | X                               | x                                  | 1 (-)               | 1 (-)                        | X                             | 1                                        |
| <b>Location</b>                  |                                 |                                    |                     |                              |                               |                                          |
| No capital                       | X                               | x                                  | 1.62 (1.01-2.60)    | 2.24 (1.46-3.46)             | 1.66 (1.23-2.22)              | X                                        |
| Capital                          | X                               | x                                  | 1 (-)               | 1 (-)                        | 1                             | X                                        |
| <b>Type of funding</b>           |                                 |                                    |                     |                              |                               |                                          |
| Private                          | 0.71 (0.55-0.93)                | 0.55 (0.31-0.97)                   | 3.36 (1.75-6.49)    | 0.47 (0.29-0.77)             | X                             | 1.87 (1.28-2.74)                         |
| Public                           | 1 (-)                           | 1 (-)                              | 1 (-)               | 1 (-)                        | X                             | 1 (-)                                    |
| <b>Mother's age (years)</b>      |                                 |                                    |                     |                              |                               |                                          |
| 12 to 19                         | 1.17 (1.06-1.29)                |                                    | 0.85 (0.74-0.97)    | 0.75 (0.64-0.88)             |                               | 1.07 (0.95-1.20)                         |
| 20 to 34                         | 1 (-)                           | X                                  | 1 (-)               | 1 (-)                        | X                             | 1 (-)                                    |
| 35 or more                       | 1.00 (0.88-1.13)                | X                                  | 1.30 (1.07-1.58)    | 0.97 (0.84-1.11)             | x                             | 1.20 (1.05-1.36)                         |
| <b>Mother's years' schooling</b> |                                 |                                    |                     |                              |                               |                                          |
| ≤ 7                              | 1.47 (1.22-1.78)                | X                                  | X                   | 1.76 (1.36-2.27)             | x                             | 0.76 (0.62-0.95)                         |
| 8 to 10                          | 1.32 (1.10-1.60)                | X                                  | X                   | 1.88 (1.46-2.42)             | x                             | 0.79 (0.64-0.97)                         |
| 11 to 14                         | 1.20 (1.01-1.42)                | X                                  | X                   | 1.65 (1.34-2.03)             | x                             | 0.90 (0.75-1.08)                         |
| 15 or more                       | 1 (-)                           | X                                  | X                   | 1 (-)                        | x                             | 1 (-)                                    |

**Social Class**

|       |   |   |   |                  |   |   |
|-------|---|---|---|------------------|---|---|
| A + B | X | X | X | 1 (-)            | X | X |
| C     | X | X | X | 1.40 (1.19-1.65) | X | X |
| D + E | X | X | X | 1.77 (1.28-2.44) | X | X |

**Antenatal care**

|            |                  |   |                  |                  |   |                  |
|------------|------------------|---|------------------|------------------|---|------------------|
| Inadequate | 1.67 (1.47-1.89) | X | 1.25 (1.04-1.49) | 1.38 (1.13-1.68) | x | 0.96 (0.84-1.09) |
| Adequate   | 1 (-)            | X | 1 (-)            | 1 (-)            | x | 1 (-)            |

**Type of delivery**

|           |                  |                  |                  |   |                  |                  |
|-----------|------------------|------------------|------------------|---|------------------|------------------|
| Caesarean | 0.84 (0.77-0.91) | 0.55 (0.36-0.84) | 4.93 (3.77-6.46) | X | 3.07 (3.37-4.90) | 2.55 (2.21-2.96) |
| Vaginal   | 1 (-)            | 1 (-)            | 1 (-)            | X | 1 (-)            | 1 (-)            |

**Material resources ≥ 80%**

|            |   |                  |   |                  |   |   |
|------------|---|------------------|---|------------------|---|---|
| Inadequate | X | 2.16 (1.17-4.01) | X | 3.70 (2.08-6.61) | X | X |
| Adequate   | X | 1 (-)            | X | 1 (-)            | X | X |

**Neonatal ICU beds**

|     |   |                  |                  |   |   |   |
|-----|---|------------------|------------------|---|---|---|
| No  | X | 3.93 (2.34-6.66) | 2.08 (1.24-3.48) | x | X | X |
| Yes | X | 1 (-)            | 1 (-)            | x | X | X |

---

Items filled with x are variables excluded from the model.

## DISCUSSION

In Brazil, neonatal morbidity and mortality remains high despite the availability of universal antenatal care and hospital delivery, highlighting the low quality in delivery and birth assistance. A widespread availability of ENC items can effectively contribute to improving this situation.

However, our study has confirmed that the coverage of the ENC items in Brazil is low and that it varies depending on the characteristics of both the mother and the health facility, where the delivery occurs.

The requirement for pregnant women to be enrolled with a referral health facility during the antenatal period has been regulated in Brazil since 2007 [18]. However, the percentage of pregnant women informed of the referral maternity, where they will be admitted to give birth, is still small. Pregnant women in labour may have to search for more than one hospital for delivery and this may contribute to the fact that only 10% of high-risk births occur in public maternities considered adequate for neonatal care in Brazil. This situation was highlighted by a prior study using data from the "Birth in Brazil" survey [19]. Such situations certainly put women's health at risk, in addition to increasing the likelihood of neonatal death [7], and point to a failure in the integration between antenatal services and childbirth care.

Antenatal corticosteroids were used in only 41% of indicated cases and is another marked deficiency in the quality of antenatal care offered in Brazil. Every year, thousands of preterm babies are exposed to neonatal respiratory distress syndrome and to the risk of death from causes considered preventable if women received adequate care during pregnancy [20][14]. Corticosteroid use can avert 20 to 40% of neonatal deaths related to complications from preterm birth [21]. The fact that hospitals with private funding were more likely to use antenatal corticosteroids could be explained by mothers having greater access to antenatal

1  
2  
3 care and by a more formal link between antenatal and childbirth care compared with publicly  
4  
5 funded hospitals. The rate of corticosteroid antenatal use in our study was lower than those  
6  
7 previously reported in other countries, e.g., Japan (58%), Peru (75%) [22] and the USA (87%)  
8  
9 [23]. Intensive efforts are needed to scale up the use of antenatal corticosteroids in facilities  
10  
11 across Brazil.

12  
13  
14 It is estimated that the use of a partograph can reduce early neonatal deaths from  
15  
16 asphyxia by 40% [21]. We found the use of partographs is still very far from the recommended  
17  
18 level of 90% [21]. Worryingly, women who underwent caesarean delivery were less likely to  
19  
20 have their labour monitored and were consequently more likely to suffer undesirable maternal  
21  
22 and/or neonatal outcomes. We found that births in privately funded facilities were a risk factor  
23  
24 for not using a partograph, probably due to the fact that in those facilities prelabour caesarean  
25  
26 section is frequent (78,3%) [24].

27  
28  
29 In Brazil, all women are entitled to a companion during their hospital stay for delivery  
30  
31 [25]. However, this item had the lowest coverage (< 20%). A previous study [26], based on the  
32  
33 “Birth in Brazil” project and focussing on the implementation of the requirement of continuous  
34  
35 social support during hospital stays for childbirth, found that the main reason for not having a  
36  
37 companion present during delivery was due to prohibition by the hospital and that only 1.4%  
38  
39 of women did not wish to be accompanied. Our results demonstrate the positive effect of  
40  
41 adequate structures at facilities on ECN practices. These facilities have probably more physical  
42  
43 capacity and material resources to support a companion.

44  
45  
46  
47 The coverage of early skin-to-skin contact in Brazil is lower than in Argentina (83%),  
48  
49 similar to Nagpur (32%) and Kenya (25.1%), and is higher than Pakistan (2%) [27]. In the USA,  
50  
51 early skin-to-skin rates were 83% in vaginal deliveries and 69.9% in uncomplicated caesarean  
52  
53 births [28]. Our results show that in health facilities in capital cities, newborns by vaginal  
54  
55 delivery were more likely to experience skin-to-skin contact and protection from hypothermia,  
56  
57  
58  
59

1  
2  
3 which reduces the risk of infection, coagulation disorders, neonatal respiratory distress  
4  
5 syndrome, and cerebroventricular haemorrhage, directly influencing neonatal mortality and  
6  
7 morbidity [29]. It is estimated that proper prevention and management of hypothermia could  
8  
9 avert 40% of neonatal mortality [30].  
10

11  
12 Early breast feeding within the first hour of birth is an important factor associated with  
13  
14 lower neonatal mortality [31], averting around 10% of neonatal deaths [30]. This study found  
15  
16 the coverage to be around 59% in Brazil, which is slightly higher than the mean of 50% found  
17  
18 by Requejo et al. [3] for the 75 countries responsible for 95% of all neonatal deaths. The  
19  
20 coverage in Brazil is classified as good according to the WHO [32], lower than the coverage in  
21  
22 Zambia (92%)[27], and higher than in India (36.4%), Bangladesh (24%), or Pakistan (8.5%) [33].  
23  
24

25  
26 A study in India [34], examining over 12,000 births after training in the ENC program,  
27  
28 reported that the coverage of breast feeding in the first hour after birth increased from 73.1%  
29  
30 to 88.4% and early skin-to-skin contact increased from 50.2% to 81.7%, whilst neonatal  
31  
32 mortality decreased.  
33

34  
35 Our results demonstrate the negative effect of caesarean sections on early breast  
36  
37 feeding. Data from a meta-analysis [35], covering more than half a million women in 31  
38  
39 countries, suggested an inverse association between caesarean delivery and early breast  
40  
41 feeding, corroborating the association found in this study. This fact may be related to  
42  
43 anaesthesia and post-partum surgical procedures [36]. As the frequency of caesarean delivery  
44  
45 in Brazil has reached high levels of around 56% [6], the situation calls for interventions to  
46  
47 evaluate more judiciously the options available for this kind of delivery. In Brazil, it was verified  
48  
49 that caesarean section was associated with the birth of preterm and early term babies and  
50  
51 these babies are more likely to be admitted to neonatal ICU, hindering early lactation [37][38].  
52  
53 To reduce neonatal mortality in Brazil, all mothers, regardless of mode of delivery, should be  
54  
55 encouraged to breastfeed early. Caesarean delivery can delay the onset of lactation, disrupt  
56  
57  
58  
59  
60

1  
2  
3 mother-infant interaction, or inhibit infant suckling [35]. Lassi et al. describe a 44% reduction  
4  
5 in neonatal mortality when breast feeding began in the first 24 hours after birth [39]. In  
6  
7 another study of more than 10,000 newborns in Brazil [36], the delivery location was described  
8  
9 as a pivotal factor for breast feeding, which was not found in this study.

## 14 15 LIMITATIONS

16  
17 The “Birth in Brazil” study was conducted in hospitals with more than 500 deliveries  
18  
19 per year and 80% of childbirths in the country are in these hospitals. Smaller hospitals are  
20  
21 likely to have worse structures, which would result in an underestimation of the inadequacies  
22  
23 of health care. The study data were based on information provided by women early after  
24  
25 delivery, by managers and from medical records, rather than from observation of the  
26  
27 performance of the essential care items. This study was not originally designed to examine the  
28  
29 ENC and thus did not include all the items of the program. Nonetheless, the items investigated  
30  
31 here are described worldwide as evidence-based cost-effective interventions in reducing  
32  
33 neonatal mortality and morbidity [21][39].  
34  
35  
36  
37  
38  
39

## 40 41 CONCLUSION AND RECOMMENDATIONS

42  
43 We found a positive effect of adequate structure at health facilities on the use of  
44  
45 antenatal corticosteroids and partographs during labour. We found a negative effect of  
46  
47 caesarean section on early skin-to-skin contact and early breast feeding.  
48  
49

50  
51 In Brazil, the South and Southeast regions have the lowest rate of neonatal mortality  
52  
53 [7] and these regions have more reference hospitals for the care of high-risk pregnancies and  
54  
55 neonates [13]. The North and Northeast regions have the highest rate of neonatal mortality  
56  
57  
58  
59



1  
2  
3 [7], have fewer reference hospitals [13], have less access to antenatal care services, and, in  
4 these regions, the majority of hospitals are located in state capitals [40]. The regional  
5 differences, as observed in other countries [41], reveal inequalities in the distribution of health  
6 funding and exemplify the phenomenon described as the Inverse Care Law [42], where  
7 individuals with fewer financial resources and with greater need receive worse and lower  
8 quality health care.  
9  
10  
11  
12  
13  
14  
15

16 The essential interventions investigated here are simple and inexpensive and should be  
17 integrated into existing health policies. The low and uneven coverage of such simple health  
18 technologies indicates the necessity for more widespread interventions to improve perinatal  
19 outcomes. Related coverage data should also be collected frequently in routine national  
20 surveys to guide the allocation of funding in priority areas, such as health facilities without  
21 NICU and with inadequate material resources.  
22  
23  
24  
25  
26  
27  
28  
29  
30  
31

#### 32 CONFLICT OF INTERESTS

33  
34  
35 There are no conflicts of interest.  
36  
37

#### 38 CONTRIBUTORSHIP STATEMENT

39  
40  
41 MASM, RQG, RC and SDA participated in the design, analysis, and data interpretation,  
42 and in the drafting and final approval of the manuscript; VEP collaborated in the database  
43 organization and statistical analysis; MCL participated in the design of the article, oversaw the  
44 analysis, and made the final revision of the article. All co-authors contributed to the  
45 improvement of the article.  
46  
47  
48  
49  
50

#### 51 FUNDING

52  
53  
54  
55  
56  
57  
58  
59  
60

1  
2  
3 This work was supported by the Ministério da Ciência, Tecnologia e Inovação -  
4 Conselho Nacional de Desenvolvimento Científico e Tecnológico; Fundação Carlos Chagas Filho  
5 de Amparo à Pesquisa do Estado do Rio de Janeiro and Fundação Oswaldo Cruz. The funders  
6 had no role in study design, data collection and analysis, decision to publish or preparation of  
7 the manuscript.  
8  
9  
10  
11  
12

#### 13 14 ACKNOWLEDGEMENTS

15  
16  
17 This paper was professionally edited by The Scientific Editing Company Ltd., UK.  
18

19  
20 We thank the regional and state coordinators, supervisors, data collectors, and all the  
21 staff at the participating health facilities from the 'Birth in Brazil' study. We also thank the  
22 mothers who participated and made this study possible.  
23  
24  
25  
26  
27  
28  
29

#### 30 DATA SHARING STATEMENT

31  
32 No additional data available.  
33  
34  
35  
36  
37  
38  
39  
40  
41  
42  
43  
44  
45  
46  
47  
48  
49  
50  
51  
52  
53  
54  
55  
56  
57  
58  
59  
60

## LIST OF REFERENCES

- 1 NATIONS U. Sustainable Development. <https://sustainabledevelopment.un.org/sdg3>. 2017.<https://sustainabledevelopment.un.org/sdg3>
- 2 UNICEF. Committing to Child Survival : A Promise Renewed. Progress Report. *WwwApromiserenewedOrg* 2014;;104. doi:978-92-806-4706-8
- 3 Requejo JH, Bryce J, Barros AJD, *et al*. Countdown to 2015 and beyond: fulfilling the health agenda for women and children. *Lancet (London, England)* Published Online First: 2015. doi:10.1016/S0140-6736(14)60925-9
- 4 Bhutta ZA, Das JK, Bahl R, *et al*. Can available interventions end preventable deaths in mothers, newborn babies, and stillbirths, and at what cost? *Lancet* 2014;**384**. doi:10.1016/S0140-6736(14)60792-3
- 5 Narayanan I, Rose M, Cordero D, *et al*. The Components of Essential Newborn Care. *Basics Support Institutionalizing Child Surviv Proj (BASICS II) United States Agency Int Dev* 2004.
- 6 Leal MDC, Szwarcwald CL, Almeida PVB, *et al*. Reproductive , maternal , neonatal and child health in the 30 years since the creation of the Unified Health System ( SUS ). *Ciência e Saúde Coletiva* 2018;**23**:1915–28. doi:10.1590/1413-81232018236.03942018
- 7 Lansky S, Friche AA de L, Silva AAM da, *et al*. Birth in Brazil survey : neonatal mortality

- 1  
2  
3 profile, and maternal and child care. *Cad Saúde Pública* 2014;**30**:192–207.  
4  
5 doi:10.1590/0102-311X00133213  
6  
7  
8 8 Black RE, Cousens S, Johnson HL, *et al*. Global, regional, and national causes of child  
9  
10 mortality in 2008: a systematic analysis. *Lancet* 2010;**375**:1969–87. doi:10.1016/S0140-  
11  
12 6736(10)60549-1  
13  
14  
15 9 Danzhen You, Lucia Hug, Simon Ejdemyr, Jan Beise PI, World. Child Mortality 2015.  
16  
17 *UNICEF WHO World Bank Gr United Nations* 2015;:74.www.childmortality.org  
18  
19  
20 10 Leal MDC, Da Silva AA, Dias MA, *et al*. Birth in Brazil: national survey into labour and  
21  
22 birth. *Reprod Health* 2012;**9**. doi:10.1186/1742-4755-9-15  
23  
24  
25 11 Haldane JBS. On a Method of Estimating Frequencies. *Biometrika* 1945;**33**:222–5.  
26  
27 doi:10.2307/2332299  
28  
29  
30 12 Vasconcellos MTL, Silva PL do N, Pereira APE, *et al*. Sampling design for the Birth in  
31  
32 Brazil : National Survey into Labor and Birth. *Cad Saude Publica* 2014;**30**:S49–58.  
33  
34 doi:10.1590/0102-311X00176013  
35  
36  
37 13 Bittencourt SDA, Reis LGC, Ramos MM, *et al*. Structure in Brazilian maternity hospitals:  
38  
39 key characteristics for quality of obstetric and neonatal care. *Cad Saude Publica*  
40  
41 2014;**30 Suppl 1**:S1-12. doi:10.1590/0102-311X00176913  
42  
43  
44 14 Roberts D, Brown J, Medley N, *et al*. Antenatal corticosteroids for accelerating fetal lung  
45  
46 maturation for women at risk of preterm birth. *Cochrane Database Syst. Rev.*  
47  
48 2017;**2017**. doi:10.1002/14651858.CD004454.pub3  
49  
50  
51 15 Pereira APE, Leal M do C, da Gama SGN, *et al*. Determining gestational age based on  
52  
53 information from the Birth in Brazil study. *Cad saúde pública* 2014;**30 Suppl 1**:S1-12.  
54  
55 doi:10.1590/0102-311X00160313  
56  
57  
58  
59  
60

- 1  
2  
3 16 Ministério da Saúde. Portaria nº 1071, de 04 de julho de 2005. Institui a Política  
4 Nacional de Atenção ao Paciente Crítico. *Diário Of da União* 2005.  
5  
6  
7 17 ABEP. Brazilian Criteria 2015 and social class distribution update for 2016.  
8  
9 www.abep.org. 2016;:1–6.  
10  
11  
12 18 BRASIL. Lei nº 11.634, de 27 de dezembro de 2007. Dispõe sobre o direito da gestante  
13 ao conhecimento e a vinculação à maternidade onde receberá assistência, no âmbito  
14 do Sistema Único de Saúde-SUS. 2007.  
15  
16  
17 19 Bittencourt SDA, Gurgel RQ, Menezes MAS, *et al.* Neonatal care in Brazil: hospital  
20 structure and adequacy according to newborn obstetric risk. *Paediatr Int Child Health*  
21 2015;**35**:206–12. doi:10.1179/2046905515Y.0000000028  
22  
23  
24  
25  
26 20 Malta DC, França E, Abreu DX De, *et al.* Update of avoidable causes of death due to  
27 interventions at the Brazilian Health System. *Epidemiol e Serviços Saúde* 2010;**20**:409–  
28 12. doi:10.5123/S1679-49742011000300016  
29  
30  
31  
32  
33 21 Darmstadt GL, Bhutta ZA, Cousens S, *et al.* Evidence-based, cost-effective interventions:  
34 How many newborn babies can we save? *Lancet* 2005;**365**:977–88. doi:10.1016/S0140-  
35 6736(05)71088-6  
36  
37  
38  
39  
40 22 Vogel JP, Souza JP, Gülmezoglu AM, *et al.* Use of antenatal corticosteroids and tocolytic  
41 drugs in preterm births in 29 countries: An analysis of the WHO Multicountry Survey on  
42 Maternal and Newborn Health. *Lancet* 2014;**384**:1869–77. doi:10.1016/S0140-  
43 6736(14)60580-8  
44  
45  
46  
47  
48  
49 23 Stoll BJ, Hansen NI, Bell EF, *et al.* Trends in care practices, morbidity, and mortality of  
50 extremely preterm Neonates, 1993-2012. *JAMA - J Am Med Assoc* 2015;**314**:1039–51.  
51 doi:10.1001/jama.2015.10244  
52  
53  
54  
55  
56 24 Domingues RMSM, Dias MAB, Nakamura-Pereira M, *et al.* Process of decision-making  
57  
58  
59

- 1  
2  
3 regarding the mode of birth in Brazil: from the initial preference of women to the final  
4 mode of birth. *Cad Saude Publica* 2014;**30**:1–16. doi:S0102-311X2014001300017 [pii]  
5  
6  
7  
8 25 Brasil. Lei nº 11.108, de 07 de abril de 2005. Dispõe sobre o direito da parturiente à  
9 presença de acompanhante durante o trabalho de parto, parto e pós-parto imediato,  
10 no âmbito do Sistema Único de Saúde-SUS. *Diário Of da União* 2005.  
11  
12  
13  
14 26 Diniz CSG, D’Orsi E, Domingues RMSM, *et al.* Implementation of the presence of  
15 companions during hospital admission for childbirth: data from the Birth in Brazil  
16 national survey. *Cad Saude Publica* 2014;**30**:S140–53. doi:10.1590/0102-311X00127013  
17  
18  
19  
20  
21 27 Dhaded SM, Somannavar MS, Vernekar SS, *et al.* Neonatal mortality and coverage of  
22 essential newborn interventions 2010 - 2013: a prospective, population-based study  
23 from low-middle income countries. *Reprod Health* 2015;**12**:S6. doi:10.1186/1742-4755-  
24 12-S2-S6  
25  
26  
27  
28  
29  
30  
31 28 Prevention C for DC and. Breastfeeding: Report Card.  
32 [https://www.cdc.gov/breastfeeding/data/mpinc/data/2015/tables2\\_1a-2\\_4a.htm](https://www.cdc.gov/breastfeeding/data/mpinc/data/2015/tables2_1a-2_4a.htm).  
33  
34 2015.[https://www.cdc.gov/breastfeeding/data/mpinc/data/2015/tables2\\_1a-2\\_4a.htm](https://www.cdc.gov/breastfeeding/data/mpinc/data/2015/tables2_1a-2_4a.htm)  
35  
36  
37  
38 29 Lyu Y, Shah PS, Ye XY, *et al.* Association Between Admission Temperature and Mortality  
39 and Major Morbidity in Preterm Infants Born at Fewer Than 33 Weeks’ Gestation. *JAMA*  
40 *Pediatr* 2015;**169**:e150277. doi:10.1001/jamapediatrics.2015.0277  
41  
42  
43  
44 30 Darmstadt GL, Walker N, Lawn JE, *et al.* Saving newborn lives in Asia and Africa: Cost  
45 and impact of phased scale-up of interventions within the continuum of care. *Health*  
46 *Policy Plan* 2008;**23**:101–17. doi:10.1093/heapol/czn001  
47  
48  
49  
50  
51 31 Khan J, Vesel L, Bahl R, *et al.* Timing of Breastfeeding Initiation and Exclusivity of  
52 Breastfeeding During the First Month of Life: Effects on Neonatal Mortality and  
53 Morbidity—A Systematic Review and Meta-analysis. *Matern Child Health J*  
54  
55  
56  
57  
58  
59  
60

- 1  
2  
3 2015;**19**:468–79.  
4  
5  
6 32 WHO (World Health Organization), UNICEF (United Nations Children’s Fund). Global  
7 Strategy for Infant and Young Child Feeding. *World Heal Organ* 2003;:1–30. doi:ISBN 92  
8 4 156221 8  
9  
10  
11  
12 33 Adhikari M, Khanal V, Karkee R, *et al*. Factors associated with early initiation of  
13 breastfeeding among Nepalese mothers: further analysis of Nepal Demographic and  
14 Health Survey, 2011. *Int Breastfeed J* 2014;**9**:21. doi:10.1186/1746-4358-7-1  
15  
16  
17  
18  
19 34 Goudar SS, Dhaded SM, McClure EM, *et al*. ENC training reduces perinatal mortality in  
20 Karnataka, India. *J Matern Neonatal Med* 2012;**25**:568–74.  
21  
22 doi:10.3109/14767058.2011.584088  
23  
24  
25  
26 35 Prior E, Santhakumaran S, Gale C, *et al*. Breastfeeding after cesarean delivery: A  
27 systematic review and meta-analysis of world literature. *Am J Clin Nutr* 2012;**95**:1113–  
28  
29 35. doi:10.3945/ajcn.111.030254  
30  
31  
32  
33 36 Boccolini CS, Carvalho ML, Oliveira MIC, *et al*. Factors associated with breastfeeding in  
34 the first hour of life. *Rev Saude Publica* 2011;**45**:69–78. www.scielo.br/rsp  
35  
36  
37  
38 37 Leal MDC, Esteves-Pereira AP, Nakamura-Pereira M, *et al*. Burden of early-term birth on  
39 adverse infant outcomes: a population-based cohort study in Brazil. *BMJ Open*  
40 2017;**7**:e017789. doi:10.1136/bmjopen-2017-017789  
41  
42  
43  
44  
45 38 Leal MDC, Esteves-Pereira AP, Nakamura-Pereira M, *et al*. Prevalence and risk factors  
46 related to preterm birth in Brazil. *Reprod Health* 2016;**13**. doi:10.1186/s12978-016-  
47 0230-0  
48  
49  
50  
51  
52 39 Lassi ZS, Middleton PF, Crowther C, *et al*. Interventions to Improve Neonatal Health and  
53 Later Survival: An Overview of Systematic Reviews. *EBioMedicine* Published Online First:  
54 2015. doi:10.1016/j.ebiom.2015.05.023  
55  
56  
57  
58  
59

- 1  
2  
3 40 Viellas EF, Domingues RMSM, Dias MAB, *et al.* Prenatal care in Brazil. *Cad Saude Publica*  
4 2014;**30 Suppl 1**:S1-15. doi:S0102-311X2014001300016 [pii]  
5  
6  
7 41 Lassi ZS, Salam RA, Das JK, *et al.* Essential interventions for maternal, newborn and child  
8 health: background and methodology. *Reprod Health* 2014;**11**:S1. doi:10.1186/1742-  
9 4755-11-S1-S1  
10  
11  
12  
13  
14 42 Tudor Hart J. THE INVERSE CARE LAW. *Lancet* 1971;**297**:405–12. doi:10.1016/S0140-  
15 6736(71)92410-X  
16  
17  
18  
19  
20  
21  
22  
23  
24  
25  
26  
27  
28  
29  
30  
31  
32  
33  
34  
35  
36  
37  
38  
39  
40  
41  
42  
43  
44  
45  
46  
47  
48  
49  
50  
51  
52  
53  
54  
55  
56  
57  
58  
59  
60



**STROBE 2007 (v4) Statement—Checklist of items that should be included in reports of *cross-sectional studies***

| Section/Topic            | Item # | Recommendation                                                                                                                                                                       | Reported on page #                   |
|--------------------------|--------|--------------------------------------------------------------------------------------------------------------------------------------------------------------------------------------|--------------------------------------|
| Title and abstract       | 1      | (a) Indicate the study's design with a commonly used term in the title or the abstract                                                                                               | Page 1, lines 3-4                    |
|                          |        | (b) Provide in the abstract an informative and balanced summary of what was done and what was found                                                                                  | Page 2                               |
| <b>Introduction</b>      |        |                                                                                                                                                                                      |                                      |
| Background/rationale     | 2      | Explain the scientific background and rationale for the investigation being reported                                                                                                 | Page 5                               |
| Objectives               | 3      | State specific objectives, including any prespecified hypotheses                                                                                                                     | Page 6, lines 12-18                  |
| <b>Methods</b>           |        |                                                                                                                                                                                      |                                      |
| Study design             | 4      | Present key elements of study design early in the paper                                                                                                                              | Page 6, lines 29-38                  |
| Setting                  | 5      | Describe the setting, locations, and relevant dates, including periods of recruitment, exposure, follow-up, and data collection                                                      | Page 6, line 34; page 7, lines 42-43 |
| Participants             | 6      | (a) Give the eligibility criteria, and the sources and methods of selection of participants                                                                                          | Page 6, line 44 to page 7, line 29   |
| Variables                | 7      | Clearly define all outcomes, exposures, predictors, potential confounders, and effect modifiers. Give diagnostic criteria, if applicable                                             | Page 8, line 13 to page 9, line 5    |
| Data sources/measurement | 8*     | For each variable of interest, give sources of data and details of methods of assessment (measurement). Describe comparability of assessment methods if there is more than one group | Page 7, line 34 to page 8, line 5    |
| Bias                     | 9      | Describe any efforts to address potential sources of bias                                                                                                                            | <u>Page 10, line 9-22</u>            |
| Study size               | 10     | Explain how the study size was arrived at                                                                                                                                            | Page 6, line 44                      |
| Quantitative variables   | 11     | Explain how quantitative variables were handled in the analyses. If applicable, describe which groupings were chosen and why                                                         | Page 9, lines 11-21                  |
| Statistical methods      | 12     | (a) Describe all statistical methods, including those used to control for confounding                                                                                                | Page 9, line 54 to page 10, line 22  |
|                          |        | (b) Describe any methods used to examine subgroups and interactions                                                                                                                  | Page 9, line 11 to page 10, line 22  |
|                          |        | (c) Explain how missing data were addressed                                                                                                                                          | Page 7, line 27-28                   |
|                          |        | (d) If applicable, describe analytical methods taking account of sampling strategy                                                                                                   | Page 10, lines 18-22                 |

|                          |     |                                                                                                                                                                                                              |                                      |
|--------------------------|-----|--------------------------------------------------------------------------------------------------------------------------------------------------------------------------------------------------------------|--------------------------------------|
|                          |     | (e) Describe any sensitivity analyses                                                                                                                                                                        | Page 10, lines 3-18                  |
| <b>Results</b>           |     |                                                                                                                                                                                                              |                                      |
| Participants             | 13* | (a) Report numbers of individuals at each stage of study—eg numbers potentially eligible, examined for eligibility, confirmed eligible, included in the study, completing follow-up, and analysed            | Page 10, line 54 to page 11, line 35 |
|                          |     | (b) Give reasons for non-participation at each stage                                                                                                                                                         | NA                                   |
|                          |     | (c) Consider use of a flow diagram                                                                                                                                                                           | NA                                   |
| Descriptive data         | 14* | (a) Give characteristics of study participants (eg demographic, clinical, social) and information on exposures and potential confounders                                                                     | Page 10, line 54 to page 11, line 35 |
|                          |     | (b) Indicate number of participants with missing data for each variable of interest                                                                                                                          | NA                                   |
| Outcome data             | 15* | Report numbers of outcome events or summary measures                                                                                                                                                         | Pages 10, line 54 to page 18         |
| Main results             | 16  | (a) Give unadjusted estimates and, if applicable, confounder-adjusted estimates and their precision (eg, 95% confidence interval). Make clear which confounders were adjusted for and why they were included | Pages 11, lines 37-46; pages 15-16   |
|                          |     | (b) Report category boundaries when continuous variables were categorized                                                                                                                                    | NA                                   |
|                          |     | (c) If relevant, consider translating estimates of relative risk into absolute risk for a meaningful time period                                                                                             | NA                                   |
| Other analyses           | 17  | Report other analyses done—eg analyses of subgroups and interactions, and sensitivity analyses                                                                                                               | Page 11, line 48 to page 12, line 17 |
| <b>Discussion</b>        |     |                                                                                                                                                                                                              |                                      |
| Key results              | 18  | Summarise key results with reference to study objectives                                                                                                                                                     | Page 19, lines 15-19                 |
| Limitations              | 19  | Discuss limitations of the study, taking into account sources of potential bias or imprecision. Discuss both direction and magnitude of any potential bias                                                   | Page 22, lines 18-35                 |
| Interpretation           | 20  | Give a cautious overall interpretation of results considering objectives, limitations, multiplicity of analyses, results from similar studies, and other relevant evidence                                   | Page 19, line 22 to page 22, line 9  |
| Generalisability         | 21  | Discuss the generalisability (external validity) of the study results                                                                                                                                        | Page 19, line 22 to page 22, line 9  |
| <b>Other information</b> |     |                                                                                                                                                                                                              |                                      |
| Funding                  | 22  | Give the source of funding and the role of the funders for the present study and, if applicable, for the original study on which the present article is based                                                | Page 24, line 3-11                   |

\*Give information separately for cases and controls in case-control studies and, if applicable, for exposed and unexposed groups in cohort and cross-sectional studies.

1  
2  
3  
4  
5  
6  
7  
8  
9  
10  
11  
12  
13  
14  
15  
16  
17  
18  
19  
20  
21  
22  
23  
24  
25  
26  
27  
28  
29  
30  
31  
32  
33  
34  
35  
36  
37  
38  
39  
40  
41  
42  
43  
44  
45  
46  
47

**Note:** An Explanation and Elaboration article discusses each checklist item and gives methodological background and published examples of transparent reporting. The STROBE checklist is best used in conjunction with this article (freely available on the Web sites of PLoS Medicine at <http://www.plosmedicine.org/>, Annals of Internal Medicine at <http://www.annals.org/>, and Epidemiology at <http://www.epidem.com/>). Information on the STROBE Initiative is available at [www.strobe-statement.org](http://www.strobe-statement.org).

For peer review only

# BMJ Open

## HEALTH FACILITY STRUCTURE AND MATERNAL CHARACTERISTICS RELATED TO ESSENTIAL NEWBORN CARE IN BRAZIL: A CROSS-SECTIONAL STUDY

|                                 |                                                                                                                                                                                                                                                                                                                                                                                                                                                                                                                                                                                                                 |
|---------------------------------|-----------------------------------------------------------------------------------------------------------------------------------------------------------------------------------------------------------------------------------------------------------------------------------------------------------------------------------------------------------------------------------------------------------------------------------------------------------------------------------------------------------------------------------------------------------------------------------------------------------------|
| Journal:                        | <i>BMJ Open</i>                                                                                                                                                                                                                                                                                                                                                                                                                                                                                                                                                                                                 |
| Manuscript ID                   | bmjopen-2017-021431.R2                                                                                                                                                                                                                                                                                                                                                                                                                                                                                                                                                                                          |
| Article Type:                   | Research                                                                                                                                                                                                                                                                                                                                                                                                                                                                                                                                                                                                        |
| Date Submitted by the Author:   | 10-Oct-2018                                                                                                                                                                                                                                                                                                                                                                                                                                                                                                                                                                                                     |
| Complete List of Authors:       | MENEZES, MARIA ALEXSANDRA; Universidade Federal de Sergipe, ; Gurgel, Ricardo; Universidade Federal de Sergipe, Postgraduate Programme in Health Science<br>Bittencourt, Sonia; National School of Public Health (ENSP/FIOCRUZ), Department of Epidemiology and Quantitative Methods in Health<br>Pacheco, Vanessa; Escola Nacional de Saude Publica, Postgraduate Programme in Epidemiology and Public Health<br>Cipolotti, Rosana; Federal University of Sergipe, Brazil. , Medicine<br>Leal, Maria do Carmo; Escola Nacional de Saude Publica, Department of Epidemiology and Quantitative Methods in Health |
| <b>Primary Subject Heading</b>: | Evidence based practice                                                                                                                                                                                                                                                                                                                                                                                                                                                                                                                                                                                         |
| Secondary Subject Heading:      | Paediatrics, Public health, Obstetrics and gynaecology, Epidemiology                                                                                                                                                                                                                                                                                                                                                                                                                                                                                                                                            |
| Keywords:                       | NEONATOLOGY, EPIDEMIOLOGY, Quality in health care < HEALTH SERVICES ADMINISTRATION & MANAGEMENT, PUBLIC HEALTH                                                                                                                                                                                                                                                                                                                                                                                                                                                                                                  |
|                                 |                                                                                                                                                                                                                                                                                                                                                                                                                                                                                                                                                                                                                 |

SCHOLARONE™  
Manuscripts

1  
2  
3 HEALTH FACILITY STRUCTURE AND MATERNAL CHARACTERISTICS RELATED  
4 TO ESSENTIAL NEWBORN CARE IN BRAZIL: A CROSS-SECTIONAL STUDY  
5  
6  
7

8 Corresponding author: Maria Alexandra Silva Menezes

9 Postgraduate Programme in Health Science – Sergipe Federal University – Aracaju, Brazil

10 Street Boquim, 477, Centro, Aracaju-SE/Brazil

11 ZIP Code 49010-280

12 [alexandra.mar@hotmail.com](mailto:alexandra.mar@hotmail.com)

13 55 (79) 99142-0305

14 55 (79) 3221-1598  
15  
16  
17  
18  
19  
20  
21

22 Co-authors

23 Ricardo Gurgel - Postgraduate Programme in Health Science – Sergipe Federal University –  
24 Aracaju, Brazil

25  
26  
27 Sonia Duarte Azevedo Bittencourt - Department of Epidemiology and Quantitative Methods in  
28 Health, National School of Public Health (ENSP/FIOCRUZ) – Rio de Janeiro, Brazil

29  
30  
31 Vanessa Eufrazino Pacheco - Postgraduate Programme in Epidemiology and Public Health –  
32 National School of Public Health (ENSP/FIOCRUZ) – Rio de Janeiro, Brazil

33  
34  
35 Rosana Cipolotti - Postgraduate Programme in Health Science – Sergipe Federal University –  
36 Aracaju, Brazil

37  
38  
39 Maria do Carmo Leal - Department of Epidemiology and Quantitative Methods in Health,  
40 National School of Public Health (ENSP/FIOCRUZ) – Rio de Janeiro, Brazil

41  
42  
43  
44 MeSH terms: Maternal-Child Health Services; Process Assessment (Health Care). Hospitals,  
45 Private. Hospitals, Public. Health Care Quality, Access, and Evaluation.  
46  
47  
48  
49

50 Word Count: Abstract 294; 3,773 words (exclude abstract).  
51  
52  
53  
54  
55  
56  
57  
58  
59  
60

1  
2  
3 ABSTRACT  
4  
5

6 OBJECTIVES: To assess the use of the WHO's Essential Newborn Care (ENC) program  
7 items and to investigate how the non-use of such technologies associates with the mothers'  
8 characteristics and hospital structure.  
9  
10

11  
12  
13 DESIGN: A cross-sectional observational health facility assessment.  
14

15  
16 SETTING: This is a secondary analysis of the "Birth in Brazil" study, a national  
17 population-based survey on postnatal women/newborn babies and of 266 publicly and  
18 privately funded health facilities (secondary and tertiary level of care).  
19  
20

21  
22  
23 PARTICIPANTS: Data on 23,894 postnatal women and their newborn babies were  
24 analysed.  
25

26  
27  
28 MAIN OUTCOME MEASURES: The facility structure was assessed by evaluating the  
29 availability of medicines and equipment for perinatal care, a paediatrician on call 24/7, a  
30 neonatal intensive care unit (NICU), and kangaroo mother care. The use of each ENC item was  
31 assessed according to the health facility structure and the mothers' socio-demographic  
32 characteristics.  
33  
34  
35  
36

37  
38  
39 RESULTS: The utilisation of ENC items is low in Brazil. The factors associated with  
40 failure in pregnant woman reference were: pregnant adolescents ( $OR_{adj}$  1.17; 95%CI 1.06-  
41 1.29),  $\leq 7$  years of schooling ( $OR_{adj}$  1.47; 95%CI 1.22-1.78), inadequate antenatal care ( $OR_{adj}$   
42 1.67; 95%CI 1.47-1.89). The non-use of corticosteroids was more frequently associated with  
43 the absence of an NICU ( $OR_{adj}$  3.93; 95%CI 2.34-6.66), inadequate equipment, and medicines  
44 ( $OR_{adj}$  2.16 95%CI 1.17-4.01). In caesarean deliveries, there was a less frequent use of a  
45 partograph ( $OR_{adj}$  4.93; 95%CI 3.77-6.46), early skin-to-skin contact ( $OR_{adj}$  3.07; 95%CI 3.37-  
46 4.90), and breast feeding in the first hour after birth ( $OR_{adj}$  2.55; 95%CI 2.21-2.96).  
47  
48  
49  
50  
51  
52  
53  
54  
55  
56  
57  
58  
59  
60

1  
2  
3 CONCLUSIONS: The coverage of ENC technologies use is low throughout Brazil and  
4 shows regional differences. We found a positive effect of adequate structure at health facilities  
5 on antenatal corticosteroids use and on partograph use during labour. We found a negative  
6 effect of caesarean section on early skin-to-skin contact and early breast feeding.  
7  
8  
9  
10

11  
12  
13  
14 **Keywords:** Essential Newborn Care, Brazil, structure, private health care, public health  
15 care.  
16  
17  
18  
19  
20  
21  
22  
23  
24  
25  
26  
27  
28  
29  
30  
31  
32  
33  
34  
35  
36  
37  
38  
39  
40  
41  
42  
43  
44  
45  
46  
47  
48  
49  
50  
51  
52  
53  
54  
55  
56  
57  
58  
59  
60

1  
2  
3 STRENGTHS AND LIMITATIONS OF THIS STUDY  
4  
5  
6  
7

8 Using primary data, we have conveyed a representative nationwide survey.  
9

10  
11  
12  
13 Our data are representative for the entire country and reflect regional characteristics and  
14  
15  
16 disparities.  
17

18  
19  
20  
21 The “Birth in Brazil” study was conducted in hospitals with more than 500 deliveries per year,  
22  
23 representing 80% of childbirths in the country.  
24  
25

26  
27  
28  
29 The study data was based on information provided by women shortly after delivery, by  
30  
31 medical records and by managers, rather than on performance observations of the essential  
32  
33 care items.  
34  
35

36  
37  
38 The cross-sectional nature of the survey data limits our ability to assess causal relationships.  
39  
40  
41  
42  
43  
44  
45  
46  
47  
48  
49  
50  
51  
52  
53  
54  
55  
56  
57  
58  
59  
60



## INTRODUCTION

The reduction of child mortality is a topic of the Sustainable Development Goal 3, i.e., to ensure healthy lives and promote well-being for all at all ages [1]. Neonatal mortality accounts for 45% of all under-five deaths worldwide [2] and reaches 64% in Brazil [3].

Increased coverage and quality improvement of preconception, antenatal, intrapartum, and postnatal interventions can avert 71% of neonatal deaths by 2025. Interventions around the labour period are the most effective in reducing neonatal mortality. The wider use of effective interventions will prevent one million neonatal deaths by 2020 [4].

Almost two decades ago, with a view to reducing neonatal mortality and morbidity, the World Health Organization (WHO) recommended specific care practices outlined in the Essential Newborn Care (ENC) program. These are strategic actions extended from preconception care through to the postnatal period [5]. Infant mortality tends to be lower in countries where the coverage of these essential interventions is high [3].

In Brazil, antenatal care coverage is high (98% of pregnant women had at least one antenatal care visit and 66.9% of them had more than 6 antenatal care visits in 2015) and the hospital delivery rate is almost 100%. Nevertheless, neonatal mortality remains high (9.5 deaths per 1,000 live births in 2015) [6] and deaths in first 24 hours of life account for nearly a quarter of all neonatal deaths [7]. The main reasons are preventable causes, such as complications from preterm birth, sepsis, and intrapartum-related asphyxia [8]. This situation may be linked to economic, social, and biological disparities, but may be also linked to the quality of antenatal care, labour, and birth assistance.

However, only limited national data are available on public policies, such as antenatal corticosteroid use in managing preterm labour, and on the availability of the kangaroo mother care (KMC) for preterm or low birthweight newborns [3]. Thus, identifying shortcomings in

1  
2  
3 perinatal care in Brazil is an essential stage in conducting interventions to allocate resources  
4 according to where they are needed most and where their effect will be maximised. This is a  
5 problem that may also affect other countries with a similar level of socio-economic  
6 development, observable in different places and at different intensities [9].  
7  
8  
9

10  
11 This study aims to evaluate the utilisation of certain core technologies for the care of  
12 mothers and newborns, as defined in the WHO's Essential Newborn Care program, and the  
13 association between the non-use of these technologies and variables related to hospital  
14 structure and the mothers' characteristics.  
15  
16  
17  
18  
19  
20  
21  
22

## 23 METHODS

### 24 **Design and Setting.**

25  
26 This is a cross-sectional observational health facility assessment.  
27  
28

29 This study is a secondary analysis of the "Birth in Brazil" study [10], a national  
30 population-based survey conducted between February 2011 and October 2012, including data  
31 on the mothers' pregnancy and delivery, their newborn babies, and the structure of the health  
32 facilities where the deliveries occurred.  
33  
34  
35  
36  
37  
38  
39  
40

### 41 **Participants and Sample.**

42 The sample size has a power of 80% to detect adverse outcomes in the order of 3%,  
43 and differences of at least 1.5% among large geographic regions or types of hospital  
44 governance (public/private/mixed). Mixed health care facility describes care in private  
45 hospitals that was paid for by the government's unified health care system [10]. For this study,  
46 mixed and public hospitals were analysed together.  
47  
48  
49  
50  
51  
52  
53  
54  
55  
56  
57  
58  
59  
60

1  
2  
3 For the “Birth in Brazil” study, we included 90 women who recently delivered (within  
4 the last 24 hours) from every health facility. The sample was selected using three-stage cluster  
5 sampling. The first encompassed hospitals with 500 or more deliveries per year, stratified  
6 according to Brazil’s five geographical macro-regions (North, Northeast, Southeast, South and  
7 Mid-West), location (state capital or not), and type of funding (public and private), according  
8 random sampling. In the second stage of sampling, an inverse sampling method was used to  
9 select as many days as were necessary to interview 90 postnatal women in the hospital [11].  
10 This method, originally proposed by Haldane [12] to estimate frequencies and proportions, can  
11 be defined as a technique to sample as many units (in this case, days) as are needed to observe  
12 a pre-specified number of successes or, in this case, 90 interviews performed with postnatal  
13 women in the hospital. To account for the difference in the number of live births on weekends  
14 and on work days, a minimum of seven consecutive days was mandatory and the size of the  
15 field team was determined to ensure compliance with this rule [11].  
16  
17  
18  
19  
20  
21  
22  
23  
24  
25  
26  
27  
28  
29  
30

31 The number of postnatal women (third stage of the sample) to be selected per day and  
32 for every hospital depended on the number of live births, the number of interview shifts, and  
33 the number of available interviewers per day in the hospital. To ensure a random selection of  
34 postnatal women, the survey central office prepared tables containing an ordered list of  
35 women to be interviewed according to the number of live births. The ordering of this list was  
36 defined by the order of the women’s admittance to the hospital. Some additional women were  
37 selected to replace those who did not respond [11].  
38  
39  
40  
41  
42  
43  
44  
45

#### 46 **Data collection**

47  
48  
49 Data was obtained from two sources: i) interviews were conducted with health facility  
50 managers and with postnatal women during hospitalisation within the first 24 hours after  
51 birth; ii) the medical records of mothers and newborns were consulted after hospital discharge  
52 or death. In the case of prolonged postpartum hospital stays, records were analysed up to the  
53  
54  
55  
56  
57  
58  
59  
60

1  
2  
3 42nd day of hospitalisation for mothers and up to the 28th day for newborns. In the case of  
4  
5 postnatal transfers of mothers and/or newborns, data was obtained from the hospital records  
6  
7 of the transfer destination, even when the hospital was not part of the original sample of the  
8  
9 study. In the case of refusal or early discharge, the participant was replaced by a new subject  
10  
11 selected from the same hospital. A digital photograph of the antenatal notes was taken when  
12  
13 available and the relevant data from the notes was converted into electronic form. All field  
14  
15 work was conducted by healthcare professionals or healthcare students under the supervision  
16  
17 of the research team. Further information about the sample design and data collection are  
18  
19 detailed elsewhere [10][13].  
20  
21  
22  
23  
24

### 25 **Variable definitions**

26  
27  
28 Following WHO guidelines [5], six essential neonatal care variables were investigated:  
29  
30 adequate referral of pregnant woman during the antenatal period to a specific health facility  
31  
32 for delivery; administration of antenatal corticosteroids when indicated [14] to women at risk  
33  
34 of preterm birth between 24 and 34 weeks' gestation (gestational age was calculated using an  
35  
36 algorithm that primarily relied upon early ultrasound estimates)[15]; continuous social support  
37  
38 (a companion at all times during the mother's hospital stay); use of a partograph during  
39  
40 labour; early skin-to-skin contact between mother and newborn, whilst still in the delivery  
41  
42 room; and breast feeding in the first hour after birth. These data were abstracted from medical  
43  
44 records of mothers and newborns and from interviews with postnatal woman.  
45  
46

47  
48 At the hospitals, the following structure-related variables were investigated, by  
49  
50 interviewing the facilities managers: existence of a neonatal intensive care unit (NICU) and use  
51  
52 of the KMC, a paediatrician on call 24 hours a day, availability of equipment for the emergency  
53  
54 care of mothers (laryngoscope and endotracheal tube, self-inflating bag valve mask, and  
55  
56 mechanical ventilator) and newborns (laryngoscope and endotracheal tube, self-inflating bag  
57  
58  
59  
60

1  
2 valve mask, suction device, adapter for meconium aspirator, mechanical ventilator and  
3  
4 warming device), availability of medicines for mothers and newborns (antihypertensives,  
5  
6 anxiolytics/hypnotics, corticosteroids, oxytocics, inhibitors of uterine contractility,  
7  
8 coagulants/haemostatics, magnesium sulphate, surfactant, eye drops for prophylaxis of  
9  
10 gonococcal ophthalmia, and anti-D immunoglobulin for Rh-negative women) as required by  
11  
12 Brazilian law [16]. For the set of equipment and medicines, a degree of adequacy was  
13  
14 calculated by taking affirmative responses as a percentage of the total items investigated.  
15  
16 Health facilities were classified as adequate if 80% or more of the items were available and  
17  
18 inadequate if less than 80% were available. Equal weights were attributed to all items studied.  
19  
20  
21

### 22 **Analytical approach**

23  
24  
25 The study variables were compared according to the type of funding (public or  
26  
27 private), macro-region (North, Northeast, Southeast, South and Mid-West), location (state  
28  
29 capital or not), as well as by the mothers' characteristics, such as age (12 to 19, 20 to 34 and 35  
30  
31 or more years old), schooling (7 or less, 8 to 10, 11 to 14 and 15 or more years in school), social  
32  
33 class (A or B, C, D or E), sufficient number of antenatal care visits (4 or more visits = adequate;  
34  
35 fewer than 4 = inadequate), and delivery route (vaginal or caesarean section). Women who  
36  
37 gave birth in public or mixed health care facilities and who were not covered by private health  
38  
39 insurance plans were classified as receiving public health care at childbirth. Women covered by  
40  
41 a private health insurance plan and women who gave birth in private hospitals, regardless of  
42  
43 coverage by a health insurance plan, were classified as receiving private health care at  
44  
45 childbirth.  
46  
47  
48

49 In Brazil, the organisation responsible for the demographic census (IBGE) uses a  
50  
51 particular indicator, which is a proxy wealth index. This index considers the schooling of the  
52  
53 interviewee and the access to some specific public services and goods that the interviewee  
54  
55 possesses at the time of the interview. The individual is classified according to socio-economic  
56  
57  
58  
59  
60

1  
2  
3 criteria into the following classes: A – more than 45 points; B1 – from 38 to 44 points; B2 –  
4  
5 from 29 to 37 points; C1 – from 23 to 28 points; C2 – from 17 to 27 points; D-E – from 0 to 16  
6  
7 points. For this work, classes A, B1 and B2 were grouped as class A and B, and classes C1 and  
8  
9 C2 were grouped as class C. Classes D and E remained as in the original [17].  
10

11  
12 The deliveries included in this study had “early skin-to-skin contact”; few missing cases  
13  
14 were reported for “reference to health facility”, “continuous social support” and “breast  
15  
16 feeding in first hour of birth”. The total “antenatal corticosteroids used appropriately” were at  
17  
18 risk of preterm birth between 24 and 34 weeks’ gestation. Prelabour caesareans were  
19  
20 excluded for “partograph used”.  
21  
22

23  
24 For each ENC-related variable, the percentage use was calculated (mean, 95%  
25  
26 Confidence Interval-CI) according to variables relating to the health facility structure and the  
27  
28 mothers’ socio-demographic characteristics. Simple regression models were used to estimate  
29  
30 the associations between the dependent variable (non-use to each item of essential newborn  
31  
32 care) and the independent variables listed above. Crude odds ratios with respective 95% CI  
33  
34 were then estimated. In sequence, by the backward method, multiple regression models were  
35  
36 developed with each dependent variable and the independent variables that proved significant  
37  
38 in the first analysis. Independent variables that proved significant (to a 5% level of significance)  
39  
40 in explaining the use or the non-use of each of the essential care items were retained in the  
41  
42 model. The odds ratios were adjusted, and the 95% CI were estimated. All inferential analyses  
43  
44 were weighted and took the sampling design plan into account, which considers the  
45  
46 stratification, the conglomerate, and the probability of the individuals. The results were  
47  
48 obtained using IBM® SPSS (Statistical Package for the Social Sciences, for Windows, version  
49  
50 22).  
51  
52

53  
54 The ethics committee of the Sergio Arouca National School of Public Health, Oswaldo  
55  
56 Cruz Foundation (CEP/ENSP), approved this study under the research protocol  
57  
58  
59

1  
2  
3 CAAE:0096.0.031.000–10. All hospital directors and postnatal women gave written informed  
4  
5 consent.

### 6 7 **Patient involvement**

8  
9  
10 No patients were involved in defining the research question or the outcome measures,  
11  
12 nor were they involved in the design and implementation of the study. There are no plans to  
13  
14 involve patients in the dissemination of the results.  
15  
16

## 17 18 19 20 21 **RESULTS**

22  
23  
24 The coverage of the ENC items investigated according to location, type of funding,  
25  
26 health facility structural variables, and the mothers' characteristics is shown in Table 1. In  
27  
28 Brazil, pregnant women were referred to a specific health facility during the antenatal period  
29  
30 in 58.7% (95% CI 56.7%-60.7%) of cases. According to the type of funding, this was higher in  
31  
32 privately funded and for women with adequate antenatal care. Antenatal corticosteroids were  
33  
34 used in 41.0% (95% CI 34.2%-48.0%) of indicated pregnant women; it was less frequently used  
35  
36 in publicly funded facilities, in the North and Mid-West regions, in facilities without  
37  
38 paediatrician available 24 hours a day, with material resources less than 80% and without a  
39  
40 NICU. Partograph labour monitoring occurred in 48.5% (95% CI 43.8%-53.1%) of the deliveries  
41  
42 around the country, with a distribution similar to antenatal corticosteroid use. Continuous  
43  
44 social support during the hospital stay was provided to 19.9% (95% CI 17,0%-23,1%) of the  
45  
46 entire sample; it was higher in cases where the mother had 15 or more years of schooling, in  
47  
48 facilities with a NICU, with material resources greater than 80%, and with paediatrician  
49  
50 available 24 hours a day. Early skin-to-skin contact occurred in 26.3% (95% CI 23.9.0%-29.0%)  
51  
52 of cases and only in 13.9% (95% CI 12.0%-16.2%) of women undergoing caesarean section. The  
53  
54 rate of breast feeding in the first hour after birth was 59.1% (95% CI 56.3-61.9); this was lower  
55  
56  
57  
58  
59  
60

1  
2  
3 in privately funded facilities, for older women, for women with higher schooling and income,  
4  
5 and for women delivering by caesarean section.  
6

7  
8 The simple regression analysis (Tables 2 and 3) identified health facilities with  
9  
10 inadequate material resources (OR 3.46; IC95% 1.76-6.82) and an absence of NICU beds (OR  
11  
12 5.0; IC95% 2.97-8.43) as risk factors to the non-use of antenatal corticosteroids. Pregnant  
13  
14 women in lower social classes were more likely to not receive continuous social support (social  
15  
16 classes D+ E: OR 4.0; IC 95% 2.96-5.41).  
17

18  
19 The adjusted logistic regression analysis (Table 4) showed that privately funded  
20  
21 women were more likely to not use a partograph (OR<sub>adj</sub> 3.36; IC95% 1.75-6.49) and to not  
22  
23 breast feed in the first hour after birth (OR<sub>adj</sub> 1.87; IC 95% 1.28-2.74). The use of a partograph  
24  
25 varies according to the region of residence; it is lower in the North (OR<sub>adj</sub> 6.94; IC95% 2.89-  
26  
27 16.82), Northeast (OR<sub>adj</sub>: 3.58; IC95% 2.15-5.95) and Mid-West (OR<sub>adj</sub>: 2.82; IC95% 1.52-5.22).  
28

29  
30 Lower social class was related to lower continuous social support (social class C: OR<sub>adj</sub>  
31  
32 1.40; IC95% 1.19-1.65; social class D and E: OR<sub>adj</sub>: 1.77; IC95% 1.28-2.44).  
33

34  
35 Caesarean section was associated with an absence of early skin-to-skin contact (OR<sub>adj</sub>  
36  
37 3.07; IC95% 3.37-4.90) and breast feeding in first hour after birth (OR<sub>adj</sub> 2.55; IC95% 2.21-2.96),  
38  
39 regardless of the maternal characteristics and the hospital structure.  
40  
41  
42  
43  
44  
45  
46  
47  
48  
49  
50  
51  
52  
53  
54  
55  
56  
57  
58  
59  
60



1  
2  
3  
4  
5  
6  
7  
8  
9  
10  
11  
12  
13  
14  
15  
16  
17  
18  
19  
20  
21  
22  
23  
24  
25  
26  
27  
28  
29  
30  
31  
32  
33  
34  
35  
36  
37  
38  
39  
40  
41  
42  
43  
44  
45  
46  
47

**Table 1 – Number and percentage (confidence interval) of Essential Newborn Care items according to geographical location, mothers’ socio-economic variables, type of funding and structural variables (Brazil, 2011-2012)**

| Variables                        | Reference to health facility (n=23.851) |      |           | Antenatal corticosteroids used appropriately (n=1.126) |      |           | Partograph used (n=13.458) |      |           | Continuous social support (n=23.879) |      |           | Early skin-to-skin contact (n=23.894) |      |           | Breastfeeding in first hour of birth (n=22.919) |      |           |
|----------------------------------|-----------------------------------------|------|-----------|--------------------------------------------------------|------|-----------|----------------------------|------|-----------|--------------------------------------|------|-----------|---------------------------------------|------|-----------|-------------------------------------------------|------|-----------|
|                                  | N                                       | %    | 95%CI     | N                                                      | %    | 95%CI     | n                          | %    | 95%CI     | n                                    | %    | 95%CI     | N                                     | %    | 95%CI     | n                                               | %    | 95%CI     |
| <b>Total</b>                     | 14,004                                  | 58.7 | 56.7-60.7 | 458                                                    | 41.0 | 34.2-48.0 | 6,524                      | 48.5 | 43.8-53.1 | 4,756                                | 19.9 | 17.0-23.1 | 6,293                                 | 26.3 | 23.9-29.0 | 12,374                                          | 59.1 | 56.3-61.9 |
| <b>Macro-region</b>              |                                         |      |           |                                                        |      |           |                            |      |           |                                      |      |           |                                       |      |           |                                                 |      |           |
| North                            | 1,132                                   | 49.4 | 43.7-55.2 | 34                                                     | 24.2 | 13.3-40.1 | 325                        | 22.4 | 11.8-38.3 | 277                                  | 12.1 | 7.5-18.9  | 589                                   | 25.7 | 19.1-33.5 | 1,511                                           | 73.4 | 69.0-77.4 |
| Northeast                        | 3,770                                   | 54.7 | 51.4-58.0 | 160                                                    | 42.4 | 28.4-57.8 | 1,359                      | 33.1 | 24.7-42.7 | 1,017                                | 14.7 | 10.5-20.3 | 1,857                                 | 26.9 | 22.3-32.0 | 3,353                                           | 57.1 | 52.8-61.4 |
| Southeast                        | 6,271                                   | 61.8 | 58.7-64.9 | 196                                                    | 47.6 | 36.4-59.0 | 3,631                      | 65.8 | 59.3-71.8 | 2,517                                | 24.8 | 19.6-30.8 | 2,561                                 | 25.2 | 21.2-29.7 | 4,868                                           | 54.6 | 49.2-59.9 |
| South                            | 1,906                                   | 64.0 | 56.3-71.0 | 55                                                     | 47.8 | 39.8-55.9 | 880                        | 55.1 | 44.9-64.8 | 684                                  | 22.9 | 16.8-30.5 | 910                                   | 30.5 | 24.7-36.9 | 1,719                                           | 64.1 | 56.0-71.4 |
| Mid-West                         | 925                                     | 59.7 | 53.0-66.1 | 13                                                     | 20.0 | 12.0-31.4 | 329                        | 42.0 | 28.4-57.0 | 261                                  | 16.8 | 11.1-24.7 | 376                                   | 24.2 | 16.8-33.5 | 923                                             | 65.6 | 59.9-70.8 |
| <b>Location</b>                  |                                         |      |           |                                                        |      |           |                            |      |           |                                      |      |           |                                       |      |           |                                                 |      |           |
| Non-capital                      | 8,661                                   | 57.9 | 55.3-60.6 | 190                                                    | 36.5 | 30.1-43.3 | 3,514                      | 42.5 | 37.5-47.6 | 2,290                                | 15.3 | 12.5-18.6 | 3,388                                 | 22.6 | 20.1-25.4 | 7,795                                           | 58.9 | 55.1-62.6 |
| Capital                          | 5,342                                   | 60.0 | 57.0-62.9 | 268                                                    | 45.6 | 34.3-57.3 | 3,010                      | 58.1 | 49.6-66.1 | 2,466                                | 27.7 | 22.0-34.1 | 2,905                                 | 32.6 | 27.6-37.9 | 4,579                                           | 59.5 | 55.4-63.4 |
| <b>Funding</b>                   |                                         |      |           |                                                        |      |           |                            |      |           |                                      |      |           |                                       |      |           |                                                 |      |           |
| Public                           | 11,501                                  | 56.6 | 54.5-58.7 | 385                                                    | 38.8 | 31.3-46.8 | 6,375                      | 49.3 | 44.5-54.2 | 3,391                                | 16.7 | 13.7-20.2 | 5,431                                 | 26.7 | 23.9-29.6 | 11,268                                          | 63.4 | 60.4-66.4 |
| Private                          | 2,502                                   | 70.8 | 65.5-75.5 | 73                                                     | 63.1 | 52.4-72.7 | 149                        | 27.6 | 17.7-40.4 | 1,365                                | 38.7 | 30.0-48.0 | 862                                   | 24.3 | 19.3-30.2 | 1,106                                           | 34.9 | 27.8-42.7 |
| <b>Mother’s age (years)</b>      |                                         |      |           |                                                        |      |           |                            |      |           |                                      |      |           |                                       |      |           |                                                 |      |           |
| 12 to 19                         | 2,385                                   | 52.3 | 49.5-55.1 | 88                                                     | 31.8 | 22.5-42.9 | 1,656                      | 49.5 | 44.0-54.9 | 813                                  | 17.8 | 14.7-21.3 | 1,212                                 | 26.5 | 23.4-29.9 | 2,593                                           | 59.8 | 56.5-63.0 |
| 20 to 34                         | 10,065                                  | 60.0 | 57.9-62.0 | 301                                                    | 42.8 | 35.9-50.0 | 4,417                      | 48.6 | 44.1-53.3 | 3,315                                | 19.7 | 16.8-23.1 | 4,434                                 | 26.4 | 23.9-29.1 | 8,739                                           | 54.0 | 51.1-57.0 |
| 35 or more                       | 1,549                                   | 61.9 | 58.6-65.1 | 73                                                     | 50.7 | 40.4-60.8 | 448                        | 43.6 | 37.9-49.5 | 624                                  | 24.9 | 20.9-29.3 | 645                                   | 25.7 | 22.6-29.1 | 1,042                                           | 43.4 | 39.5-47.4 |
| <b>Mother’s years’ schooling</b> |                                         |      |           |                                                        |      |           |                            |      |           |                                      |      |           |                                       |      |           |                                                 |      |           |
| ≤ 7                              | 3,285                                   | 52.1 | 49.3-54.9 | 135                                                    | 37.9 | 28.2-48.6 | 1,939                      | 43.2 | 37.9-48.6 | 868                                  | 13.7 | 11.2-16.7 | 1,826                                 | 28.9 | 25.6-32.4 | 3,552                                           | 60.0 | 56.9-63.1 |
| 8 to 10                          | 3,421                                   | 56.3 | 53.4-59.1 | 91                                                     | 33.7 | 25.1-43.6 | 2,047                      | 52.0 | 47.0-57.0 | 1,016                                | 16.7 | 13.3-20.7 | 1,614                                 | 26.5 | 23.4-29.9 | 3,464                                           | 59.3 | 56.0-62.5 |
| 11 to 14                         | 5,751                                   | 62.2 | 59.8-64.5 | 190                                                    | 45.9 | 37.6-54.5 | 2,355                      | 51.8 | 46.3-57.2 | 1,993                                | 21.5 | 18.0-25.5 | 2,261                                 | 24.4 | 22.1-26.9 | 4,525                                           | 50.4 | 46.9-53.8 |
| 15 or more                       | 1,490                                   | 70.8 | 66.7-74.6 | 44                                                     | 53.1 | 40.0-65.7 | 167                        | 38.7 | 31.7-46.1 | 848                                  | 40.3 | 34.2-46.8 | 565                                   | 26.8 | 21.1-33.4 | 774                                             | 37.4 | 33.1-41.8 |

**Social class**

|     |       |      |           |     |      |           |       |      |           |       |      |           |       |      |           |       |      |           |
|-----|-------|------|-----------|-----|------|-----------|-------|------|-----------|-------|------|-----------|-------|------|-----------|-------|------|-----------|
| D+E | 2,898 | 51.8 | 48.7-54.8 | 107 | 34.3 | 22.5-48.4 | 1,572 | 38.5 | 32.6-44.8 | 598   | 10.7 | 8.5-13.3  | 1,520 | 27.1 | 23.7-30.8 | 3,253 | 67.7 | 64.5-70.8 |
| C   | 7,184 | 58.4 | 55.9-60.8 | 239 | 42.3 | 34.7-50.3 | 3,816 | 52.7 | 48.1-57.3 | 2,244 | 18.2 | 15.0-22.0 | 3,252 | 26.4 | 23.6-29.4 | 6,479 | 60.0 | 56.8-63.1 |
| A+B | 3,804 | 66.2 | 62.9-69.4 | 108 | 45.6 | 36.0-55.4 | 1,094 | 54.0 | 48.8-59.2 | 1,860 | 32.3 | 27.8-37.2 | 1,452 | 25.2 | 21.9-28.9 | 2,529 | 49.1 | 45.0-53.2 |

**Antenatal care**

|            |        |      |           |     |      |           |       |      |           |       |      |           |       |      |           |       |      |           |
|------------|--------|------|-----------|-----|------|-----------|-------|------|-----------|-------|------|-----------|-------|------|-----------|-------|------|-----------|
| Inadequate | 1,876  | 45.5 | 42.4-48.7 | 165 | 35.1 | 26.2-45.3 | 1,261 | 42.8 | 36.9-49.1 | 538   | 13.0 | 10.7-15.8 | 1,119 | 27.1 | 23.5-31.0 | 2,257 | 57.7 | 53.6-61.6 |
| Adequate   | 11,849 | 61.5 | 59.4-63.6 | 283 | 44.9 | 37.6-52.3 | 5,148 | 50.2 | 45.7-54.8 | 4,141 | 21.5 | 18.3-25.0 | 5,067 | 26.3 | 23.8-28.9 | 9,874 | 53.2 | 50.2-56.1 |

**Type of delivery**

|                 |       |      |           |     |      |           |       |      |           |       |      |           |       |      |           |       |      |           |
|-----------------|-------|------|-----------|-----|------|-----------|-------|------|-----------|-------|------|-----------|-------|------|-----------|-------|------|-----------|
| Vaginal/forceps | 6,215 | 54.1 | 51.7-56.5 | 158 | 30.4 | 23.6-38.2 | 6,142 | 53.4 | 48.4-58.4 | 2,382 | 20.7 | 16.8-25.3 | 4,564 | 39.7 | 36.1-43.4 | 7,478 | 67.6 | 64.6-70.5 |
| Caesarean       | 7,788 | 63.0 | 60.7-65.1 | 303 | 50.0 | 41.4-58.5 | 382   | 19.5 | 16.0-23.5 | 2,374 | 19.2 | 16.3-22.4 | 1,729 | 13.9 | 12.0-16.2 | 4,896 | 41.3 | 38.0-44.6 |

**Material resources > 80%**

|     |        |      |           |     |      |           |       |      |           |       |      |           |       |      |           |        |      |           |
|-----|--------|------|-----------|-----|------|-----------|-------|------|-----------|-------|------|-----------|-------|------|-----------|--------|------|-----------|
| No  | 920    | 56.2 | 48.7-63.4 | 8   | 17.3 | 10.1-28.0 | 173   | 17.3 | 7.4-35.2  | 88    | 5.4  | 3.5-8.1   | 331   | 20.2 | 11.8-32.5 | 890    | 56.8 | 43.1-69.5 |
| Yes | 13,083 | 58.9 | 56.8-61.0 | 453 | 42.0 | 35.1-49.3 | 6,351 | 51.0 | 46.2-55.8 | 4,668 | 21.0 | 17.9-24.4 | 5,962 | 26.8 | 24.2-29.5 | 11,484 | 53.8 | 50.8-56.7 |

**Paediatrician on call 24/7**

|     |        |      |           |     |      |           |       |      |           |       |      |           |       |      |           |       |      |           |
|-----|--------|------|-----------|-----|------|-----------|-------|------|-----------|-------|------|-----------|-------|------|-----------|-------|------|-----------|
| No  | 3,737  | 58.9 | 55.0-62.8 | 64  | 27.9 | 20.1-37.4 | 1,252 | 35.3 | 26.9-44.7 | 895   | 14.1 | 10.6-18.5 | 1,733 | 27.3 | 23.1-31.9 | 3,603 | 58.8 | 53.3-64.1 |
| Yes | 10,266 | 58.6 | 56.2-61.1 | 398 | 44.3 | 36.2-52.7 | 5,272 | 53.2 | 47.6-58.7 | 3,861 | 22.0 | 18.4-26.1 | 4,560 | 26.0 | 23.0-29.2 | 8,771 | 52.2 | 48.7-55.8 |

**Neonatal ICU**

|     |       |      |           |     |      |           |       |      |           |       |      |           |       |      |           |       |      |           |
|-----|-------|------|-----------|-----|------|-----------|-------|------|-----------|-------|------|-----------|-------|------|-----------|-------|------|-----------|
| No  | 5,015 | 56.7 | 52.8-60.5 | 29  | 14.8 | 10.2-20.8 | 1,284 | 33.3 | 26.5-40.9 | 1,135 | 12.9 | 9.4-17.1  | 2,038 | 23.0 | 19.4-27.0 | 4,997 | 58.9 | 53.9-63.7 |
| Yes | 8,987 | 59.9 | 57.5-62.2 | 433 | 46.4 | 38.7-54.4 | 4,699 | 58.9 | 52.7-64.9 | 3,621 | 24.1 | 20.1-28.7 | 4,255 | 28.3 | 25.0-31.9 | 7,377 | 51.1 | 47.4-54.8 |

**Kangaroo mother care**

|     |       |      |           |     |      |           |       |      |           |       |      |           |       |      |           |       |      |           |
|-----|-------|------|-----------|-----|------|-----------|-------|------|-----------|-------|------|-----------|-------|------|-----------|-------|------|-----------|
| No  | 9,739 | 58.3 | 55.8-60.8 | 203 | 33.8 | 28.1-40.0 | 3,785 | 41.9 | 36.5-47.6 | 3,051 | 18.3 | 15.6-21.3 | 3,991 | 23.9 | 21.2-26.8 | 8,447 | 52.8 | 49.3-56.3 |
| Yes | 4,263 | 59.5 | 55.8-63.2 | 259 | 49.1 | 36.9-61.5 | 2,739 | 61.8 | 52.5-70.3 | 1,705 | 23.8 | 17.5-31.5 | 2,302 | 32.1 | 27.3-37.2 | 3,927 | 56.8 | 51.1-62.3 |

**Table 2 – Simple odds ratios (confidence interval) for non-use of Essential Newborn Care items, according to geographical location, type of funding and structural variables (Brazil, 2011-2012)**

|                                    | No reference to health facility | Antenatal Corticosteroids not used | Partograph not used | No continuous social support | No early skin-to-skin contact | No breast feeding in first hour of birth |
|------------------------------------|---------------------------------|------------------------------------|---------------------|------------------------------|-------------------------------|------------------------------------------|
|                                    | Simple OR (95%CI)               | Simple OR (95%CI)                  | Simple OR (95%CI)   | Simple OR (95%CI)            | Simple OR (95%CI)             | Simple OR (95%CI)                        |
| <b>Macro-region</b>                |                                 |                                    |                     |                              |                               |                                          |
| North                              | 1.65 [1.27,2.16]                | 2.85 [1.21,6.72]                   | 6.66 [2.95,15.02]   | 2.40 [1.30,4.41]             | 0.98 [0.63,1.52]              | 0.44 [0.32,0.59]                         |
| Northeast                          | 1.34 [1.11,1.61]                | 1.23 [0.57,2.63]                   | 3.90 [2.38,6.40]    | 1.91 [1.17,3.11]             | 0.92 [0.66,1.28]              | 0.90 [0.68,1.19]                         |
| South                              | 0.91 [0.64,1.29]                | 0.97 [0.56,1.68]                   | 1.57 [0.97,2.54]    | 1.11 [0.68,1.80]             | 0.77 [0.53,1.11]              | 0.67 [0.45,1.01]                         |
| Mid-West                           | 1.09 [0.81,1.47]                | 3.63 [1.75,7.52]                   | 2.65 [1.35,5.21]    | 1.63 [0.92,2.90]             | 1.06 [0.63,1.76]              | 0.63 [0.46,0.88]                         |
| Southeast                          | 1 (-)                           | 1 (-)                              | 1 (-)               | 1 (-)                        | 1 (-)                         | 1 (-)                                    |
| <b>Location</b>                    |                                 |                                    |                     |                              |                               |                                          |
| Not capital                        | 1.09 [0.92,1.28]                | 1.45 [0.84,2.49]                   | 1.88 [1.26,2.79]    | 2.12 [1.45,3.10]             | 1.65 [.25,2.18]               | 1.02 [0.82,1.28]                         |
| Capital                            | 1 (-)                           | 1 (-)                              | 1 (-)               | 1 (-)                        | 1 (-)                         | 1 (-)                                    |
| <b>Type of funding</b>             |                                 |                                    |                     |                              |                               |                                          |
| Private                            | 0.54 [0.42,0.70]                | 0.38 [0.22,0.65]                   | 2.55 [1.39,4.68]    | 0.32 [0.20,0.50]             | 1.13 [0.81,1.57]              | 3.24 [2.28,4.60]                         |
| Public                             | 1 (-)                           | 1 (-)                              | 1 (-)               | 1 (-)                        | 1 (-)                         | 1 (-)                                    |
| <b>Material resources &gt; 80%</b> |                                 |                                    |                     |                              |                               |                                          |
| Inadequate                         | 1.12 [0.81,1.54]                | 3.46 [1.76,6.82]                   | 4.99 [1.85,13.45]   | 4.69 [2.87,7.67]             | 1.44 [0.75,2.79]              | 0.93 [0.52,1.66]                         |
| Adequate                           | 1 (-)                           | 1 (-)                              | 1 (-)               | 1 (-)                        | 1 (-)                         | 1 (-)                                    |
| <b>Paediatrician on call 24/7</b>  |                                 |                                    |                     |                              |                               |                                          |
| No                                 | 0.99 [0.81,1.21]                | 2.06 [1.16,3.64]                   | 2.09 [1.31,3.32]    | 1.72 [1.16,2.56]             | 0.94 [0.71,1.24]              | 0.81 [0.60,1.09]                         |
| Yes                                | 1 (-)                           | 1 (-)                              | 1 (-)               | 1 (-)                        | 1 (-)                         | 1 (-)                                    |
| <b>Kangaroo mother care</b>        |                                 |                                    |                     |                              |                               |                                          |
| No                                 | 1.05 [0.86,1.28]                | 1.89 [1.08,3.32]                   | 2.24 [1.39,3.59]    | 1.40 [0.92,2.12]             | 1.51 [1.15,1.97]              | 1.35 [0.99,1.83]                         |
| Yes                                | 1 (-)                           | 1 (-)                              | 1 (-)               | 1 (-)                        | 1 (-)                         | 1 (-)                                    |
| <b>Neonatal ICU beds</b>           |                                 |                                    |                     |                              |                               |                                          |
| No                                 | 1.14 [0.94,1.38]                | 5.00 [2.97,8.43]                   | 2.88 [1.88,4.41]    | 2.17 [1.43,3.27]             | 1.32 [1.01,1.74]              | 0.82 [0.62,1.08]                         |
| Yes                                | 1 (-)                           | 1 (-)                              | 1 (-)               | 1 (-)                        | 1 (-)                         | 1 (-)                                    |

**Table 3 – Simple odds ratios (confidence interval) of non-use of Essential Newborn Care items, according to the mothers' socio-economic variables (Brazil, 2011-2012)**

|                                  | No reference to health facility | Antenatal Corticosteroids not used | Partograph not used | No continuous social support | No early skin-to-skin contact | No breastfeeding in first hour of birth |
|----------------------------------|---------------------------------|------------------------------------|---------------------|------------------------------|-------------------------------|-----------------------------------------|
|                                  | Simple OR (95%CI)               | Simple OR (95%CI)                  | Simple OR (95%CI)   | Simple OR (95%CI)            | Simple OR (95%CI)             | Simple OR (95%CI)                       |
| <b>Mother's age (years)</b>      |                                 |                                    |                     |                              |                               |                                         |
| 12 to 19                         | 1.37 (1.23-1.52)                | 1.60 (1.08-2.38)                   | 0.97 (0.86-1.09)    | 1.14 (0.96-1.34)             | 0.99 (0.89-1.11)              | 0.76 (0.68-0.86)                        |
| 20 to 34                         | 1 (-)                           | 1 (-)                              | 1 (-)               | 1 (-)                        | 1 (-)                         | 1 (-)                                   |
| 35 or more                       | 0.92 (0.82-1.04)                | 0.73 (0.50-1.05)                   | 1.23 (1.03-1.45)    | 0.74 (0.65-0.85)             | 1.04 (0.91-1.18)              | 1.45 (1.28-1.64)                        |
| <b>Mother's years' schooling</b> |                                 |                                    |                     |                              |                               |                                         |
| ≤ 7                              | 2.23 (1.81-2.75)                | 1.85 (0.99-3.48)                   | 0.83 (0.60-1.16)    | 4.24 (3.05-5.89)             | 0.90 (0.64-1.27)              | 0.34 (0.27-0.42)                        |
| 8 to 10                          | 1.89 (1.53-2.32)                | 2.22 (1.14-4.31)                   | 0.58 (0.41-0.81)    | 3.37 (2.40-4.73)             | 1.01 (0.73-1.42)              | 0.38 (0.30-0.47)                        |
| 11 to 14                         | 1.48 (1.23-1.77)                | 1.33 (0.71-2.48)                   | 0.59 (0.42-0.81)    | 2.46 (1.88-3.24)             | 1.13 (0.84-1.54)              | 0.54 (0.46-0.65)                        |
| 15 or more                       | 1 (-)                           | 1 (-)                              | 1 (-)               | 1 (-)                        | 1 (-)                         | 1 (-)                                   |
| <b>Social Class</b>              |                                 |                                    |                     |                              |                               |                                         |
| A + B                            | 1 (-)                           | 1 (-)                              | 1 (-)               | 1 (-)                        | 1 (-)                         | 1 (-)                                   |
| C                                | 1.40 (1.22-1.60)                | 1.14 (0.73-1.78)                   | 1.06 (0.89-1.25)    | 2.15 (1.78-2.58)             | 0.94 (0.78-1.13)              | 0.64 (0.55-0.74)                        |
| D + E                            | 1.82 (1.48-2.24)                | 1.60 (0.84-3.06)                   | 1.88 (1.46-2.42)    | 4.00(2.96-5.41)              | 0.91 (0.73-1.14)              | 0.46 (0.38-0.55)                        |
| <b>Antenatal care</b>            |                                 |                                    |                     |                              |                               |                                         |
| Inadequate                       | 1.91 (1.68-2.18)                | 1.50 (1.00-2.26)                   | 1.34 (1.13-1.60)    | 1.83 (1.51-2.21)             | 0.96 (0.82-1.13)              | 0.68 (0.59-0.78)                        |
| Adequate                         | 1 (-)                           | 1 (-)                              | 1                   | 1 (-)                        | 1 (-)                         | 1 (-)                                   |
| <b>Type of delivery</b>          |                                 |                                    |                     |                              |                               |                                         |
| Caesarean                        | 0.69 (0.63-0.77)                | 0.44 (0.29-0.65)                   | 4.74 (3.59-6.25)    | 1.10 (0.85-1.42)             | 4.06 (3.38-4.88)              | 3.04 (2.62-3.53)                        |
| Vaginal                          | 1 (-)                           | 1 (-)                              | 1 (-)               | 1 (-)                        | 1 (-)                         | 1 (-)                                   |

**Table 4 – Adjusted odds ratios (confidence interval) for non-use of Essential Newborn Care items, according to geographical location, type of funding, structural variables and mothers' socio-economic variables (Brazil, 2011-2012)**

|                                  | No reference to health facility | Antenatal Corticosteroids not used | Partograph not used | No continuous social support | No early skin-to-skin contact | No breast feeding in first hour of birth |
|----------------------------------|---------------------------------|------------------------------------|---------------------|------------------------------|-------------------------------|------------------------------------------|
|                                  | Adjusted OR (95%CI)             | Adjusted OR (95%CI)                | Adjusted OR (95%CI) | Adjusted OR (95%CI)          | Adjusted OR (95%CI)           | Adjusted OR (95%CI)                      |
| <b>Macro-region</b>              |                                 |                                    |                     |                              |                               |                                          |
| North                            | X                               | x                                  | 6.94 (2.89-16.82)   | 2.01 (1.06-3.8)              | X                             | 0.48 (0.35-0.65)                         |
| Northeast                        | X                               | x                                  | 3.58 (2.15-5.95)    | 1.81 (1.08-3.03)             | X                             | 0.92 (0.69-1.23)                         |
| South                            | X                               | x                                  | 1.42 (0.83-2.45)    | 1.11 (0.66-1.86)             | X                             | 0.64 (0.42-0.97)                         |
| Mid-West                         | X                               | x                                  | 2.82 (1.52-5.22)    | 2.25 (1.2-4.24)              | X                             | 0.56 (0.37-0.84)                         |
| Southeast                        | X                               | x                                  | 1 (-)               | 1 (-)                        | X                             | 1                                        |
| <b>Location</b>                  |                                 |                                    |                     |                              |                               |                                          |
| No capital                       | X                               | x                                  | 1.62 (1.01-2.60)    | 2.24 (1.46-3.46)             | 1.66 (1.23-2.22)              | X                                        |
| Capital                          | X                               | x                                  | 1 (-)               | 1 (-)                        | 1                             | X                                        |
| <b>Type of funding</b>           |                                 |                                    |                     |                              |                               |                                          |
| Private                          | 0.71 (0.55-0.93)                | 0.55 (0.31-0.97)                   | 3.36 (1.75-6.49)    | 0.47 (0.29-0.77)             | X                             | 1.87 (1.28-2.74)                         |
| Public                           | 1 (-)                           | 1 (-)                              | 1 (-)               | 1 (-)                        | X                             | 1 (-)                                    |
| <b>Mother's age (years)</b>      |                                 |                                    |                     |                              |                               |                                          |
| 12 to 19                         | 1.17 (1.06-1.29)                |                                    | 0.85 (0.74-0.97)    | 0.75 (0.64-0.88)             |                               | 1.07 (0.95-1.20)                         |
| 20 to 34                         | 1 (-)                           | X                                  | 1 (-)               | 1 (-)                        | X                             | 1 (-)                                    |
| 35 or more                       | 1.00 (0.88-1.13)                | X                                  | 1.30 (1.07-1.58)    | 0.97 (0.84-1.11)             | x                             | 1.20 (1.05-1.36)                         |
| <b>Mother's years' schooling</b> |                                 |                                    |                     |                              |                               |                                          |
| ≤ 7                              | 1.47 (1.22-1.78)                | X                                  | X                   | 1.76 (1.36-2.27)             | x                             | 0.76 (0.62-0.95)                         |
| 8 to 10                          | 1.32 (1.10-1.60)                | X                                  | X                   | 1.88 (1.46-2.42)             | x                             | 0.79 (0.64-0.97)                         |
| 11 to 14                         | 1.20 (1.01-1.42)                | X                                  | X                   | 1.65 (1.34-2.03)             | x                             | 0.90 (0.75-1.08)                         |
| 15 or more                       | 1 (-)                           | X                                  | X                   | 1 (-)                        | x                             | 1 (-)                                    |

**Social Class**

|       |   |   |   |                  |   |   |
|-------|---|---|---|------------------|---|---|
| A + B | X | X | X | 1 (-)            | X | X |
| C     | X | X | X | 1.40 (1.19-1.65) | X | X |
| D + E | X | X | X | 1.77 (1.28-2.44) | X | X |

**Antenatal care**

|            |                  |   |                  |                  |   |                  |
|------------|------------------|---|------------------|------------------|---|------------------|
| Inadequate | 1.67 (1.47-1.89) | X | 1.25 (1.04-1.49) | 1.38 (1.13-1.68) | x | 0.96 (0.84-1.09) |
| Adequate   | 1 (-)            | X | 1 (-)            | 1 (-)            | x | 1 (-)            |

**Type of delivery**

|           |                  |                  |                  |   |                  |                  |
|-----------|------------------|------------------|------------------|---|------------------|------------------|
| Caesarean | 0.84 (0.77-0.91) | 0.55 (0.36-0.84) | 4.93 (3.77-6.46) | X | 3.07 (3.37-4.90) | 2.55 (2.21-2.96) |
| Vaginal   | 1 (-)            | 1 (-)            | 1 (-)            | X | 1 (-)            | 1 (-)            |

**Material resources ≥ 80%**

|            |   |                  |   |                  |   |   |
|------------|---|------------------|---|------------------|---|---|
| Inadequate | X | 2.16 (1.17-4.01) | X | 3.70 (2.08-6.61) | X | X |
| Adequate   | X | 1 (-)            | X | 1 (-)            | X | X |

**Neonatal ICU beds**

|     |   |                  |                  |   |   |   |
|-----|---|------------------|------------------|---|---|---|
| No  | X | 3.93 (2.34-6.66) | 2.08 (1.24-3.48) | x | X | X |
| Yes | X | 1 (-)            | 1 (-)            | x | X | X |

---

Items filled with x are variables excluded from the model.

## DISCUSSION

In Brazil, neonatal morbidity and mortality remains high despite the availability of universal antenatal care and hospital delivery, highlighting the low quality in delivery and birth assistance. A widespread use of ENC items can effectively contribute to improving this situation.

However, our study has confirmed that the coverage of the ENC items in Brazil is low and that it varies, depending on the characteristics of both the mother and the health facility, where the delivery occurs.

The requirement for pregnant women to be enrolled with a referral health facility during the antenatal period has been regulated in Brazil since 2007 [18]. However, the percentage of pregnant women informed of the referral maternity, where they will be admitted to give birth, is still small. Pregnant women in labour may have to visit more than one hospital in order to be admitted for delivery and this may contribute to the fact that only 10% of high-risk births occur in public maternities considered adequate for neonatal care in Brazil. This situation was highlighted by a prior study using data from the "Birth in Brazil" survey [19]. Such situations certainly put the health of women at risk, in addition to increasing the likelihood of neonatal death [7], and point to a failure in the integration between antenatal services and childbirth care.

Antenatal corticosteroids were used in only 41% of indicated cases and is another marked deficiency in the quality of antenatal care offered in Brazil. Every year, thousands of preterm babies are exposed to neonatal respiratory distress syndrome and to the risk of death from causes considered preventable if women received adequate care during pregnancy [20][14]. Corticosteroid use can avert 20 to 40% of neonatal deaths related to complications from preterm birth [21]. The fact that hospitals with private funding were more likely to use antenatal corticosteroids could be explained by mothers having greater access to antenatal

1  
2  
3 care and by a more formal link between antenatal and childbirth care compared with publicly  
4  
5 funded hospitals. The rate of corticosteroid antenatal use in our study was lower than those  
6  
7 previously reported in other countries, e.g., Japan (58%), Peru (75%) [22] and the USA (87%)  
8  
9 [23]. Intensive efforts are needed to scale up the use of antenatal corticosteroids in facilities  
10  
11 across Brazil.

12  
13  
14 It is estimated that the use of a partograph can reduce early neonatal deaths from  
15  
16 asphyxia by 40% [21]. We found the use of partographs is still very far from the recommended  
17  
18 level of 90% [21]. Worryingly, women who underwent caesarean delivery were less likely to  
19  
20 have been monitored during labour and were consequently more likely to suffer undesirable  
21  
22 maternal and/or neonatal outcomes. We found that births in privately funded facilities were a  
23  
24 risk factor for not using a partograph, probably due to the fact that prelabour caesarean  
25  
26 section is frequent (78,3%) in those facilities [24].

27  
28  
29 In Brazil, all women are entitled to a companion during their hospital stay for delivery  
30  
31 [25]. However, this item had the lowest coverage (< 20%). A previous study [26], based on the  
32  
33 “Birth in Brazil” project and focussing on the implementation of the requirement of continuous  
34  
35 social support during hospital stays for childbirth, found that the main reason for not having a  
36  
37 companion present during delivery was due to prohibition by the hospital and that only 1.4%  
38  
39 of women did not wish to be accompanied. Our results demonstrate the positive effect of  
40  
41 adequate structures at facilities on ECN practices. These facilities have probably more physical  
42  
43 capacity and material resources to support a companion.

44  
45  
46  
47 The coverage of early skin-to-skin contact in Brazil is lower than in Argentina (83%),  
48  
49 similar to Nagpur (32%) and Kenya (25.1%), and is higher than Pakistan (2%) [27]. In the USA,  
50  
51 early skin-to-skin rates were 83% in vaginal deliveries and 69.9% in uncomplicated caesarean  
52  
53 births [28]. Our results show that in health facilities in capital cities, newborns by vaginal  
54  
55 delivery were more likely to experience skin-to-skin contact and protection from hypothermia,  
56  
57  
58  
59



1  
2  
3 which reduces the risk of infection, coagulation disorders, neonatal respiratory distress  
4 syndrome, and cerebroventricular haemorrhage, directly influencing neonatal mortality and  
5 morbidity [29]. It is estimated that proper prevention and management of hypothermia could  
6 avert 40% of neonatal mortality [30].  
7  
8  
9

10  
11  
12 Early breast feeding within the first hour of birth is an important factor associated with  
13 lower neonatal mortality [31], averting around 10% of neonatal deaths [30]. This study found  
14 the coverage to be around 59% in Brazil, which is slightly higher than the mean of 50% found  
15 by Requejo et al. [3] for the 75 countries responsible for 95% of all neonatal deaths. The  
16 coverage in Brazil is classified as good according to the WHO [32], lower than the coverage in  
17 Zambia (92%)[27], and higher than in India (36.4%), Bangladesh (24%), or Pakistan (8.5%) [33].  
18  
19  
20  
21  
22  
23

24  
25 A study in India [34], examining over 12,000 births after training in the ENC program,  
26 reported that the coverage of breast feeding in the first hour after birth increased from 73.1%  
27 to 88.4% and early skin-to-skin contact increased from 50.2% to 81.7%, whilst neonatal  
28 mortality decreased.  
29  
30  
31  
32  
33

34  
35 Our results demonstrate the negative effect of caesarean sections on early breast  
36 feeding. Data from a meta-analysis [35], covering more than half a million women in 31  
37 countries, suggested an inverse association between caesarean delivery and early breast  
38 feeding, corroborating the association found in this study. This fact may be related to  
39 anaesthesia and post-partum surgical procedures [36]. As the frequency of caesarean delivery  
40 in Brazil has reached high levels of around 56% [6], the situation calls for interventions to  
41 evaluate more judiciously the options available for this kind of delivery. In Brazil, it was verified  
42 that caesarean section was associated with the birth of preterm and early term babies and  
43 these babies are more likely to be admitted to neonatal ICU, hindering early lactation [37][38].  
44  
45  
46  
47  
48  
49  
50  
51  
52  
53  
54  
55  
56  
57  
58  
59  
60  
To reduce neonatal mortality in Brazil, all mothers, regardless of mode of delivery, should be  
encouraged to breastfeed early. Caesarean delivery can delay the onset of lactation, disrupt

1  
2  
3 mother-infant interaction, or inhibit infant suckling [35]. Lassi et al. describe a 44% reduction  
4  
5 in neonatal mortality when breast feeding began in the first 24 hours after birth [39]. In  
6  
7 another study of more than 10,000 newborns in Brazil [36], the delivery location was described  
8  
9 as a pivotal factor for breast feeding, which was not found in this study.  
10

## 11 12 13 14 15 LIMITATIONS

16  
17 The “Birth in Brazil” study was conducted in hospitals with more than 500 deliveries  
18  
19 per year and 80% of childbirths in the country are in these hospitals. Smaller hospitals are  
20  
21 likely to have worse structures, which would result in an underestimation of the inadequacies  
22  
23 of health care. The study data were based on information provided by women early after  
24  
25 delivery, by managers and from medical records, rather than from observation of the  
26  
27 performance of the essential care items. This study was not originally designed to examine the  
28  
29 ENC and thus did not include all the items of the program. Nonetheless, the items investigated  
30  
31 here are described worldwide as evidence-based cost-effective interventions in reducing  
32  
33 neonatal mortality and morbidity [21][39].  
34  
35  
36  
37  
38  
39

## 40 41 42 CONCLUSION AND RECOMMENDATIONS

43  
44 We found a positive effect of adequate structure at health facilities on the use of  
45  
46 antenatal corticosteroids and partographs during labour. We found a negative effect of  
47  
48 caesarean section on early skin-to-skin contact and early breast feeding.  
49

50  
51 In Brazil, the South and Southeast regions have the lowest rate of neonatal mortality  
52  
53 [7] and these regions have more reference hospitals for the care of high-risk pregnancies and  
54  
55 neonates [13]. The North and Northeast regions have the highest rate of neonatal mortality  
56  
57  
58  
59

1  
2  
3 [7], have fewer reference hospitals [13], have less access to antenatal care services, and, in  
4 these regions, the majority of hospitals are located in state capitals [40]. The regional  
5 differences, as observed in other countries [41], reveal inequalities in the distribution of health  
6 funding and exemplify the phenomenon described as the Inverse Care Law [42], where  
7 individuals with fewer financial resources and with greater need receive worse and lower  
8 quality health care.  
9  
10  
11  
12  
13  
14  
15

16 The essential interventions investigated here are simple and inexpensive and should be  
17 integrated into existing health policies. The low and uneven coverage of such simple health  
18 technologies indicates the necessity for more widespread interventions to improve perinatal  
19 outcomes. Related coverage data should also be collected frequently in routine national  
20 surveys to guide the allocation of funding in priority areas, such as health facilities without  
21 NICU and with inadequate material resources.  
22  
23  
24  
25  
26  
27  
28  
29  
30  
31

#### 32 CONFLICT OF INTERESTS

33  
34  
35 There are no conflicts of interest.  
36  
37

#### 38 CONTRIBUTORSHIP STATEMENT

39  
40  
41 MASM, RQG, RC and SDA participated in the design, analysis, data interpretation, and  
42 in the drafting and final approval of the manuscript; VEP collaborated in the database  
43 organisation and statistical analysis; MCL participated in the design of the article, oversaw the  
44 analysis, and made the final revision of the article. All co-authors contributed to the  
45 improvement of the article.  
46  
47  
48  
49  
50

#### 51 FUNDING

52  
53  
54  
55  
56  
57  
58  
59  
60

1  
2  
3 This work was supported by the Ministério da Ciência, Tecnologia e Inovação -  
4 Conselho Nacional de Desenvolvimento Científico e Tecnológico; Fundação Carlos Chagas Filho  
5 de Amparo à Pesquisa do Estado do Rio de Janeiro and Fundação Oswaldo Cruz. The funders  
6 had no role in the study design, data collection and analysis, decision to publish or preparation  
7 of the manuscript.  
8  
9  
10  
11  
12

#### 13 14 ACKNOWLEDGEMENTS

15  
16  
17 This paper was professionally edited by The Scientific Editing Company Ltd., UK.  
18

19  
20 We thank the regional and state coordinators, supervisors, data collectors, and all the  
21 staff at the participating health facilities from the 'Birth in Brazil' study. We also thank the  
22 mothers who participated and made this study possible.  
23  
24  
25  
26  
27  
28  
29

#### 30 DATA SHARING STATEMENT

31  
32 No additional data available.  
33  
34  
35  
36  
37  
38  
39  
40  
41  
42  
43  
44  
45  
46  
47  
48  
49  
50  
51  
52  
53  
54  
55  
56  
57  
58  
59  
60

## LIST OF REFERENCES

- 1 NATIONS U. Sustainable Development. <https://sustainabledevelopment.un.org/sdg3>. 2017.<https://sustainabledevelopment.un.org/sdg3>
- 2 UNICEF. Committing to Child Survival : A Promise Renewed. Progress Report. *WwwApromiserenewedOrg* 2014;;104. doi:978-92-806-4706-8
- 3 Requejo JH, Bryce J, Barros AJD, *et al*. Countdown to 2015 and beyond: fulfilling the health agenda for women and children. *Lancet (London, England)* Published Online First: 2015. doi:10.1016/S0140-6736(14)60925-9
- 4 Bhutta ZA, Das JK, Bahl R, *et al*. Can available interventions end preventable deaths in mothers, newborn babies, and stillbirths, and at what cost? *Lancet* 2014;**384**. doi:10.1016/S0140-6736(14)60792-3
- 5 Narayanan I, Rose M, Cordero D, *et al*. The Components of Essential Newborn Care. *Basics Support Institutionalizing Child Surviv Proj (BASICS II) United States Agency Int Dev* 2004.
- 6 Leal MDC, Szwarcwald CL, Almeida PVB, *et al*. Reproductive , maternal , neonatal and child health in the 30 years since the creation of the Unified Health System ( SUS ). *Ciência e Saúde Coletiva* 2018;**23**:1915–28. doi:10.1590/1413-81232018236.03942018
- 7 Lansky S, Friche AA de L, Silva AAM da, *et al*. Birth in Brazil survey : neonatal mortality profile, and maternal and child care. *Cad Saúde Pública* 2014;**30**:192–207. doi:10.1590/0102-311X00133213

- 1  
2  
3 8 Black RE, Cousens S, Johnson HL, *et al.* Global, regional, and national causes of child  
4 mortality in 2008: a systematic analysis. *Lancet* 2010;**375**:1969–87. doi:10.1016/S0140-  
5 6736(10)60549-1  
6  
7  
8  
9 9 Danzhen You, Lucia Hug, Simon Ejdemyr, Jan Beise PI, World. Child Mortality 2015.  
10 *UNICEF WHO World Bank Gr United Nations* 2015;:74.www.childmortality.org  
11  
12  
13  
14 10 Leal MDC, Da Silva AA, Dias MA, *et al.* Birth in Brazil: national survey into labour and  
15 birth. *Reprod Health* 2012;**9**. doi:10.1186/1742-4755-9-15  
16  
17  
18  
19 11 Vasconcellos MTL, Silva PL do N, Pereira APE, *et al.* Sampling design for the Birth in  
20 Brazil : National Survey into Labor and Birth. *Cad Saude Publica* 2014;**30**:S49–58.  
21  
22  
23  
24  
25  
26  
27 12 Haldane JBS. On a Method of Estimating Frequencies. *Biometrika* 1945;**33**:222–5.  
28  
29  
30  
31  
32 13 Bittencourt SDA, Reis LGC, Ramos MM, *et al.* Structure in Brazilian maternity hospitals:  
33 key characteristics for quality of obstetric and neonatal care. *Cad Saude Publica*  
34 2014;**30 Suppl 1**:S1-12. doi:10.1590/0102-311X00176913  
35  
36  
37  
38 14 Roberts D, Brown J, Medley N, *et al.* Antenatal corticosteroids for accelerating fetal lung  
39 maturation for women at risk of preterm birth. *Cochrane Database Syst. Rev.*  
40 2017;**2017**. doi:10.1002/14651858.CD004454.pub3  
41  
42  
43  
44  
45 15 Pereira APE, Leal M do C, da Gama SGN, *et al.* Determining gestational age based on  
46 information from the Birth in Brazil study. *Cad saúde pública* 2014;**30 Suppl 1**:S1-12.  
47  
48  
49  
50  
51  
52 16 Ministério da Saúde. Portaria nº 1071, de 04 de julho de 2005. Institui a Política  
53 Nacional de Atenção ao Paciente Crítico. *Diário Of da União* 2005.  
54  
55  
56  
57  
58  
59  
60

- 1  
2  
3 17 ABEP. Brazilian Criteria 2015 and social class distribution update for 2016.  
4  
5 www.abep.org. 2016;:1–6.  
6  
7  
8 18 BRASIL. Lei nº 11.634, de 27 de dezembro de 2007. Dispõe sobre o direito da gestante  
9  
10 ao conhecimento e a vinculação à maternidade onde receberá assistência, no âmbito  
11  
12 do Sistema Único de Saúde-SUS. 2007.  
13  
14 19 Bittencourt SDA, Gurgel RQ, Menezes MAS, *et al.* Neonatal care in Brazil: hospital  
15  
16 structure and adequacy according to newborn obstetric risk. *Paediatr Int Child Health*  
17  
18 2015;**35**:206–12. doi:10.1179/2046905515Y.0000000028  
19  
20  
21 20 Malta DC, França E, Abreu DX De, *et al.* Update of avoidable causes of death due to  
22  
23 interventions at the Brazilian Health System. *Epidemiol e Serviços Saúde* 2010;**20**:409–  
24  
25 12. doi:10.5123/S1679-49742011000300016  
26  
27  
28 21 Darmstadt GL, Bhutta ZA, Cousens S, *et al.* Evidence-based, cost-effective interventions:  
29  
30 How many newborn babies can we save? *Lancet* 2005;**365**:977–88. doi:10.1016/S0140-  
31  
32 6736(05)71088-6  
33  
34  
35 22 Vogel JP, Souza JP, Gülmezoglu AM, *et al.* Use of antenatal corticosteroids and tocolytic  
36  
37 drugs in preterm births in 29 countries: An analysis of the WHO Multicountry Survey on  
38  
39 Maternal and Newborn Health. *Lancet* 2014;**384**:1869–77. doi:10.1016/S0140-  
40  
41 6736(14)60580-8  
42  
43  
44 23 Stoll BJ, Hansen NI, Bell EF, *et al.* Trends in care practices, morbidity, and mortality of  
45  
46 extremely preterm Neonates, 1993-2012. *JAMA - J Am Med Assoc* 2015;**314**:1039–51.  
47  
48 doi:10.1001/jama.2015.10244  
49  
50  
51 24 Domingues RMSM, Dias MAB, Nakamura-Pereira M, *et al.* Process of decision-making  
52  
53 regarding the mode of birth in Brazil: from the initial preference of women to the final  
54  
55 mode of birth. *Cad Saude Publica* 2014;**30**:1–16. doi:S0102-311X2014001300017 [pii]  
56  
57  
58  
59  
60

- 1  
2  
3 25 Brasil. Lei nº 11.108, de 07 de abril de 2005. Dispõe sobre o direito da parturiente à  
4 presença de acompanhante durante o trabalho de parto, parto e pós-parto imediato,  
5 no âmbito do Sistema Único de Saúde-SUS. *Diário Of da União* 2005.  
6  
7  
8  
9  
10 26 Diniz CSG, D’Orsi E, Domingues RMSM, *et al.* Implementation of the presence of  
11 companions during hospital admission for childbirth: data from the Birth in Brazil  
12 national survey. *Cad Saude Publica* 2014;**30**:S140–53. doi:10.1590/0102-311X00127013  
13  
14  
15  
16 27 Dhaded SM, Somannavar MS, Vernekar SS, *et al.* Neonatal mortality and coverage of  
17 essential newborn interventions 2010 - 2013: a prospective, population-based study  
18 from low-middle income countries. *Reprod Health* 2015;**12**:S6. doi:10.1186/1742-4755-  
19 12-S2-S6  
20  
21  
22  
23  
24  
25  
26 28 Prevention C for DC and. Breastfeeding: Report Card.  
27  
28 [https://www.cdc.gov/breastfeeding/data/mpinc/data/2015/tables2\\_1a-2\\_4a.htm](https://www.cdc.gov/breastfeeding/data/mpinc/data/2015/tables2_1a-2_4a.htm).  
29  
30 2015.[https://www.cdc.gov/breastfeeding/data/mpinc/data/2015/tables2\\_1a-2\\_4a.htm](https://www.cdc.gov/breastfeeding/data/mpinc/data/2015/tables2_1a-2_4a.htm)  
31  
32  
33 29 Lyu Y, Shah PS, Ye XY, *et al.* Association Between Admission Temperature and Mortality  
34 and Major Morbidity in Preterm Infants Born at Fewer Than 33 Weeks’ Gestation. *JAMA*  
35 *Pediatr* 2015;**169**:e150277. doi:10.1001/jamapediatrics.2015.0277  
36  
37  
38  
39  
40 30 Darmstadt GL, Walker N, Lawn JE, *et al.* Saving newborn lives in Asia and Africa: Cost  
41 and impact of phased scale-up of interventions within the continuum of care. *Health*  
42 *Policy Plan* 2008;**23**:101–17. doi:10.1093/heapol/czn001  
43  
44  
45  
46 31 Khan J, Vesel L, Bahl R, *et al.* Timing of Breastfeeding Initiation and Exclusivity of  
47 Breastfeeding During the First Month of Life: Effects on Neonatal Mortality and  
48 Morbidity—A Systematic Review and Meta-analysis. *Matern Child Health J*  
49  
50 2015;**19**:468–79.  
51  
52  
53  
54  
55 32 WHO (World Health Organization), UNICEF (United Nations Children’s Fund). Global  
56  
57  
58  
59  
60



- 1  
2  
3 Strategy for Infant and Young Child Feeding. *World Heal Organ* 2003;:1–30. doi:ISBN 92  
4 4 156221 8  
5  
6  
7  
8 33 Adhikari M, Khanal V, Karkee R, *et al.* Factors associated with early initiation of  
9  
10 breastfeeding among Nepalese mothers: further analysis of Nepal Demographic and  
11  
12 Health Survey, 2011. *Int Breastfeed J* 2014;9:21. doi:10.1186/1746-4358-7-1  
13  
14  
15 34 Goudar SS, Dhaded SM, McClure EM, *et al.* ENC training reduces perinatal mortality in  
16  
17 Karnataka, India. *J Matern Neonatal Med* 2012;25:568–74.  
18  
19 doi:10.3109/14767058.2011.584088  
20  
21  
22 35 Prior E, Santhakumaran S, Gale C, *et al.* Breastfeeding after cesarean delivery: A  
23  
24 systematic review and meta-analysis of world literature. *Am J Clin Nutr* 2012;95:1113–  
25  
26 35. doi:10.3945/ajcn.111.030254  
27  
28  
29 36 Boccolini CS, Carvalho ML, Oliveira MIC, *et al.* Factors associated with breastfeeding in  
30  
31 the first hour of life. *Rev Saude Publica* 2011;45:69–78. www.scielo.br/rsp  
32  
33  
34 37 Leal MDC, Esteves-Pereira AP, Nakamura-Pereira M, *et al.* Burden of early-term birth on  
35  
36 adverse infant outcomes: a population-based cohort study in Brazil. *BMJ Open*  
37  
38 2017;7:e017789. doi:10.1136/bmjopen-2017-017789  
39  
40  
41 38 Leal MDC, Esteves-Pereira AP, Nakamura-Pereira M, *et al.* Prevalence and risk factors  
42  
43 related to preterm birth in Brazil. *Reprod Health* 2016;13. doi:10.1186/s12978-016-  
44  
45 0230-0  
46  
47  
48 39 Lassi ZS, Middleton PF, Crowther C, *et al.* Interventions to Improve Neonatal Health and  
49  
50 Later Survival: An Overview of Systematic Reviews. *EBioMedicine* Published Online First:  
51  
52 2015. doi:10.1016/j.ebiom.2015.05.023  
53  
54  
55 40 Viellas EF, Domingues RMSM, Dias MAB, *et al.* Prenatal care in Brazil. *Cad Saude Publica*  
56  
57 2014;30 **Suppl 1**:S1-15. doi:S0102-311X2014001300016 [pii]

- 1  
2  
3 41 Lassi ZS, Salam RA, Das JK, *et al.* Essential interventions for maternal, newborn and child  
4 health: background and methodology. *Reprod Health* 2014;**11**:S1. doi:10.1186/1742-  
5 4755-11-S1-S1  
6  
7  
8  
9  
10 42 Tudor Hart J. THE INVERSE CARE LAW. *Lancet* 1971;**297**:405–12. doi:10.1016/S0140-  
11 6736(71)92410-X  
12  
13  
14  
15  
16  
17  
18  
19  
20  
21  
22  
23  
24  
25  
26  
27  
28  
29  
30  
31  
32  
33  
34  
35  
36  
37  
38  
39  
40  
41  
42  
43  
44  
45  
46  
47  
48  
49  
50  
51  
52  
53  
54  
55  
56  
57  
58  
59  
60

**STROBE 2007 (v4) Statement—Checklist of items that should be included in reports of *cross-sectional studies***

| Section/Topic            | Item # | Recommendation                                                                                                                                                                       | Reported on page #                   |
|--------------------------|--------|--------------------------------------------------------------------------------------------------------------------------------------------------------------------------------------|--------------------------------------|
| Title and abstract       | 1      | (a) Indicate the study's design with a commonly used term in the title or the abstract                                                                                               | Page 1, lines 3-4                    |
|                          |        | (b) Provide in the abstract an informative and balanced summary of what was done and what was found                                                                                  | Page 2                               |
| <b>Introduction</b>      |        |                                                                                                                                                                                      |                                      |
| Background/rationale     | 2      | Explain the scientific background and rationale for the investigation being reported                                                                                                 | Page 5                               |
| Objectives               | 3      | State specific objectives, including any prespecified hypotheses                                                                                                                     | Page 6, lines 12-18                  |
| <b>Methods</b>           |        |                                                                                                                                                                                      |                                      |
| Study design             | 4      | Present key elements of study design early in the paper                                                                                                                              | Page 6, lines 29-38                  |
| Setting                  | 5      | Describe the setting, locations, and relevant dates, including periods of recruitment, exposure, follow-up, and data collection                                                      | Page 6, line 34; page 7, lines 42-43 |
| Participants             | 6      | (a) Give the eligibility criteria, and the sources and methods of selection of participants                                                                                          | Page 6, line 44 to page 7, line 29   |
| Variables                | 7      | Clearly define all outcomes, exposures, predictors, potential confounders, and effect modifiers. Give diagnostic criteria, if applicable                                             | Page 8, line 13 to page 9, line 5    |
| Data sources/measurement | 8*     | For each variable of interest, give sources of data and details of methods of assessment (measurement). Describe comparability of assessment methods if there is more than one group | Page 7, line 34 to page 8, line 5    |
| Bias                     | 9      | Describe any efforts to address potential sources of bias                                                                                                                            | <u>Page 10, line 9-22</u>            |
| Study size               | 10     | Explain how the study size was arrived at                                                                                                                                            | Page 6, line 44                      |
| Quantitative variables   | 11     | Explain how quantitative variables were handled in the analyses. If applicable, describe which groupings were chosen and why                                                         | Page 9, lines 11-21                  |
| Statistical methods      | 12     | (a) Describe all statistical methods, including those used to control for confounding                                                                                                | Page 9, line 54 to page 10, line 22  |
|                          |        | (b) Describe any methods used to examine subgroups and interactions                                                                                                                  | Page 9, line 11 to page 10, line 22  |
|                          |        | (c) Explain how missing data were addressed                                                                                                                                          | Page 7, line 27-28                   |
|                          |        | (d) If applicable, describe analytical methods taking account of sampling strategy                                                                                                   | Page 10, lines 18-22                 |

|                          |     |                                                                                                                                                                                                              |                                      |
|--------------------------|-----|--------------------------------------------------------------------------------------------------------------------------------------------------------------------------------------------------------------|--------------------------------------|
|                          |     | (e) Describe any sensitivity analyses                                                                                                                                                                        | Page 10, lines 3-18                  |
| <b>Results</b>           |     |                                                                                                                                                                                                              |                                      |
| Participants             | 13* | (a) Report numbers of individuals at each stage of study—eg numbers potentially eligible, examined for eligibility, confirmed eligible, included in the study, completing follow-up, and analysed            | Page 10, line 54 to page 11, line 35 |
|                          |     | (b) Give reasons for non-participation at each stage                                                                                                                                                         | NA                                   |
|                          |     | (c) Consider use of a flow diagram                                                                                                                                                                           | NA                                   |
| Descriptive data         | 14* | (a) Give characteristics of study participants (eg demographic, clinical, social) and information on exposures and potential confounders                                                                     | Page 10, line 54 to page 11, line 35 |
|                          |     | (b) Indicate number of participants with missing data for each variable of interest                                                                                                                          | NA                                   |
| Outcome data             | 15* | Report numbers of outcome events or summary measures                                                                                                                                                         | Pages 10, line 54 to page 18         |
| Main results             | 16  | (a) Give unadjusted estimates and, if applicable, confounder-adjusted estimates and their precision (eg, 95% confidence interval). Make clear which confounders were adjusted for and why they were included | Pages 11, lines 37-46; pages 15-16   |
|                          |     | (b) Report category boundaries when continuous variables were categorized                                                                                                                                    | NA                                   |
|                          |     | (c) If relevant, consider translating estimates of relative risk into absolute risk for a meaningful time period                                                                                             | NA                                   |
| Other analyses           | 17  | Report other analyses done—eg analyses of subgroups and interactions, and sensitivity analyses                                                                                                               | Page 11, line 48 to page 12, line 17 |
| <b>Discussion</b>        |     |                                                                                                                                                                                                              |                                      |
| Key results              | 18  | Summarise key results with reference to study objectives                                                                                                                                                     | Page 19, lines 15-19                 |
| Limitations              | 19  | Discuss limitations of the study, taking into account sources of potential bias or imprecision. Discuss both direction and magnitude of any potential bias                                                   | Page 22, lines 18-35                 |
| Interpretation           | 20  | Give a cautious overall interpretation of results considering objectives, limitations, multiplicity of analyses, results from similar studies, and other relevant evidence                                   | Page 19, line 22 to page 22, line 9  |
| Generalisability         | 21  | Discuss the generalisability (external validity) of the study results                                                                                                                                        | Page 19, line 22 to page 22, line 9  |
| <b>Other information</b> |     |                                                                                                                                                                                                              |                                      |
| Funding                  | 22  | Give the source of funding and the role of the funders for the present study and, if applicable, for the original study on which the present article is based                                                | Page 24, line 3-11                   |

\*Give information separately for cases and controls in case-control studies and, if applicable, for exposed and unexposed groups in cohort and cross-sectional studies.

1  
2  
3  
4  
5  
6  
7  
8  
9  
10  
11  
12  
13  
14  
15  
16  
17  
18  
19  
20  
21  
22  
23  
24  
25  
26  
27  
28  
29  
30  
31  
32  
33  
34  
35  
36  
37  
38  
39  
40  
41  
42  
43  
44  
45  
46  
47

**Note:** An Explanation and Elaboration article discusses each checklist item and gives methodological background and published examples of transparent reporting. The STROBE checklist is best used in conjunction with this article (freely available on the Web sites of PLoS Medicine at <http://www.plosmedicine.org/>, Annals of Internal Medicine at <http://www.annals.org/>, and Epidemiology at <http://www.epidem.com/>). Information on the STROBE Initiative is available at [www.strobe-statement.org](http://www.strobe-statement.org).

For peer review only
